# Supplementary material
Source: PubMed Central journal article supplement (PMC10127554)
Supplement: NIHMS1889067-supplement-supinfo.pdf [file NIHMS1889067-supplement-supinfo.pdf]

# Supplementary Information

## 1,3-Diarylpyrazolones as Potential Anti-Lung Cancer Agents: Synthesis and Antiproliferative Activity Evaluation

Achyut Dahal<sup>2</sup>, Mary Lo<sup>1</sup>, Sitanshu Singh<sup>2</sup>, Huu Vo<sup>1</sup>, Denzel ElHaze<sup>1</sup>, Seetharama D. Jois<sup>2</sup>, Siva Murru<sup>1,\*</sup>

<sup>1</sup>School of Sciences, College of Arts, Education & Sciences, University of Louisiana Monroe, Monroe, LA 71201. <sup>2</sup>School of Basic Pharmaceutical and Toxicological Sciences, College of Pharmacy, University of Louisiana Monroe, Monroe, LA, 71201. \*Address for Correspondence: Dr. Siva Murru

### Table of Contents

|                                                    |      |
|----------------------------------------------------|------|
| 1. Antiproliferative activity dose-response curves | 2-5  |
| 2. Cell cycle analysis data                        | 6-7  |
| 3. NMR and HR-MS Spectra of the Products           | 8-60 |

# 1. Antiproliferative activity dose-response curves against A549 and NCI-H522 cells after 72 h:

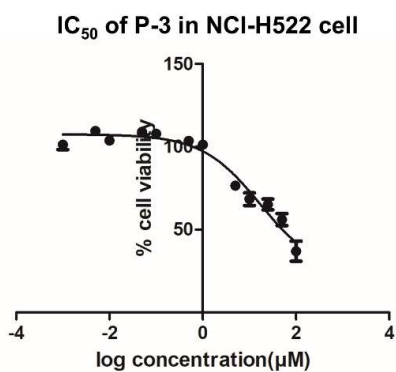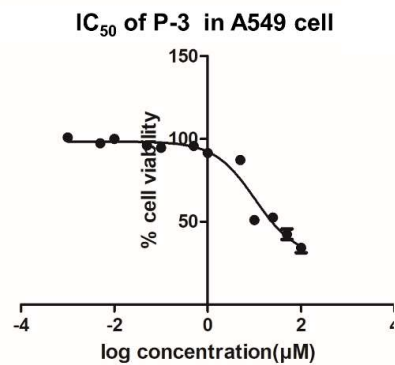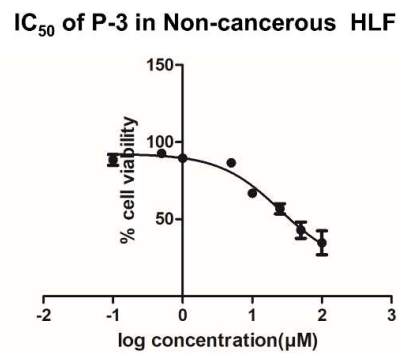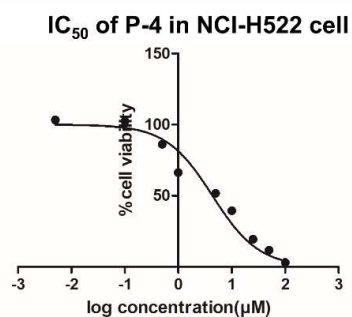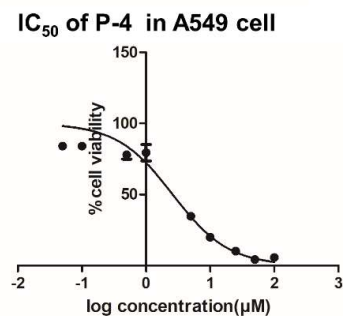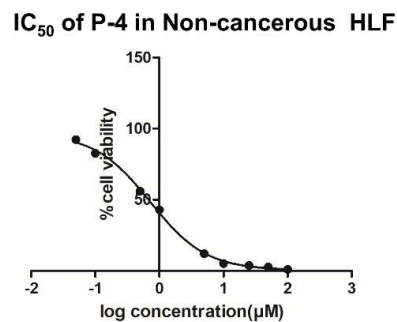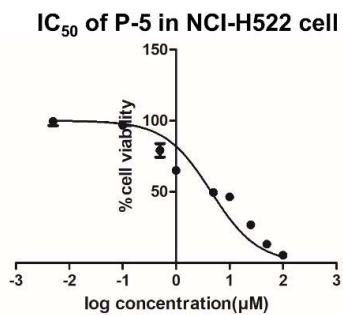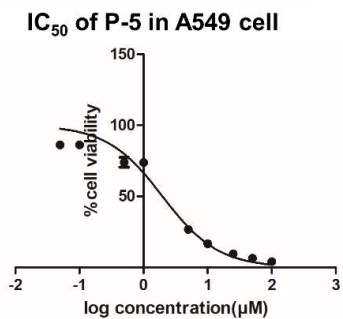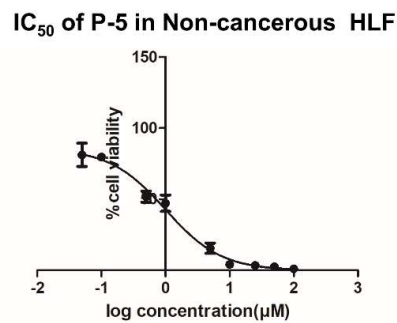

**IC<sub>50</sub> of P-7 in NCI-H522 cell**

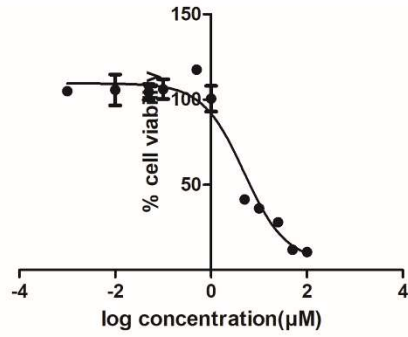

**IC<sub>50</sub> of P-7 in A549 cell**

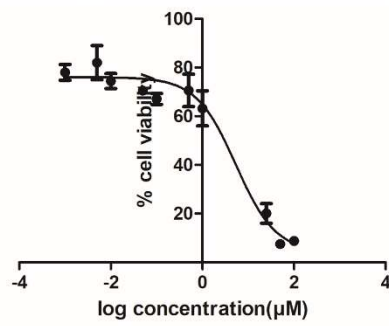

**IC<sub>50</sub> of P-7 in Non-cancerous HLF**

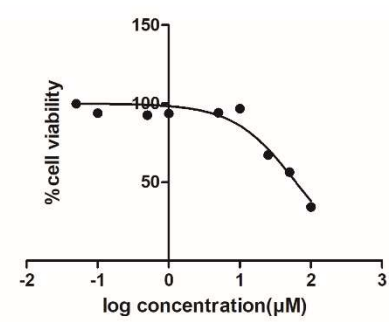

**IC<sub>50</sub> of P-13 in NCI-H522 cell**

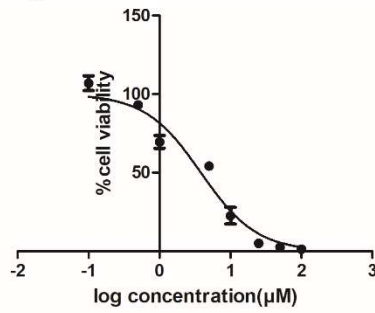

**IC<sub>50</sub> of P-13 in A549 cell**

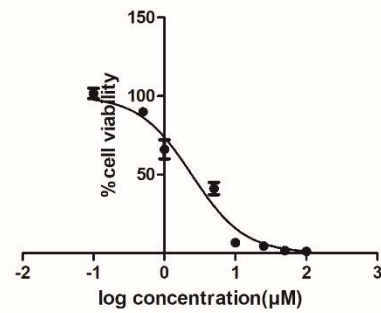

**IC<sub>50</sub> of P-13 in Non-cancerous HLF**

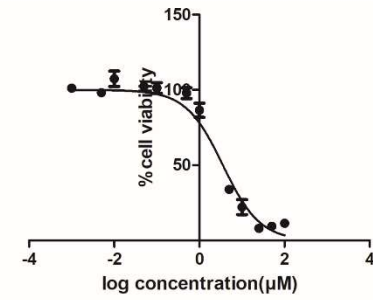

**IC<sub>50</sub> of P-14 in NCI-H522 cell**

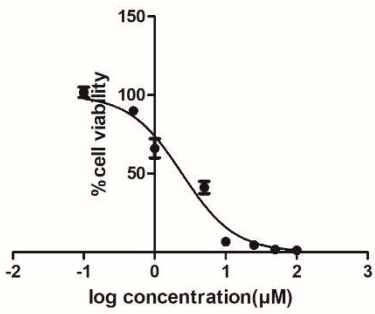

**IC<sub>50</sub> of P-14 in A549 cell**

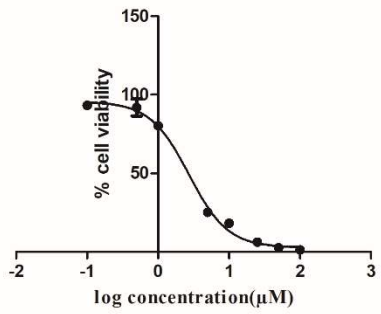

**IC<sub>50</sub> of P-14 in Non-cancerous HLF**

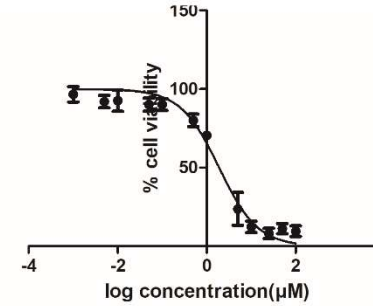

**IC<sub>50</sub> of P-15 in NCI-H522 cell**

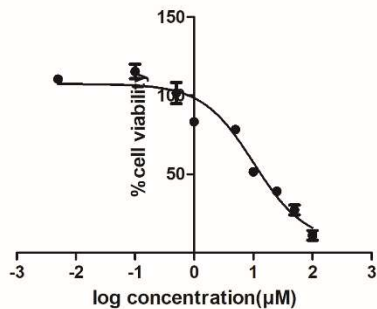

**IC<sub>50</sub> of P-15 in A549 cell**

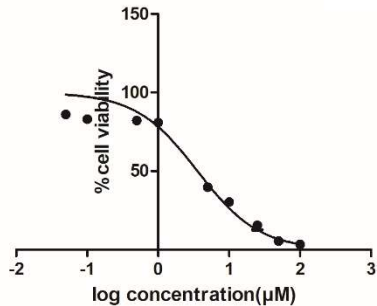

**IC<sub>50</sub> of P-15 in Non-cancerous HLF**

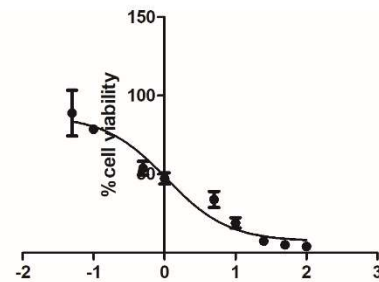

**IC<sub>50</sub> of P-16 in NCI-H522 cell**

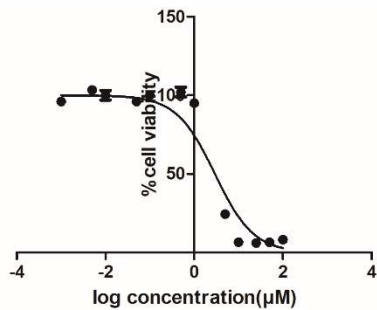

**IC<sub>50</sub> of P-16 in A549 cell**

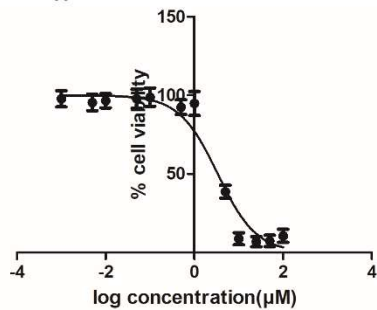

**IC<sub>50</sub> of P-16 in Non-cancerous HLF**

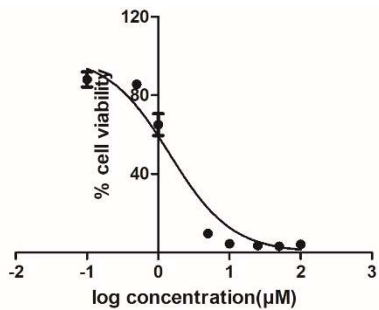

**IC<sub>50</sub> of P-17 in NCI-H522 cell**

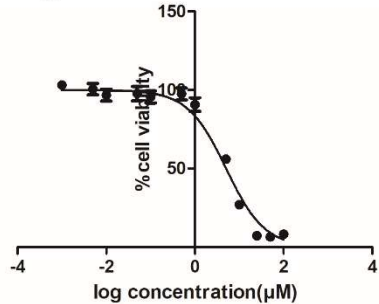

**IC<sub>50</sub> of P-17 in A549 cell**

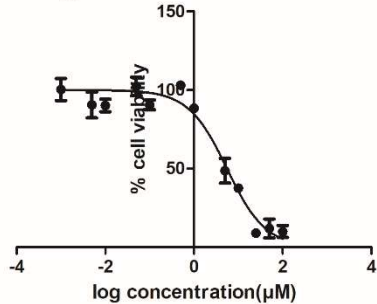

**IC<sub>50</sub> of P-17 in Non-cancerous HLF**

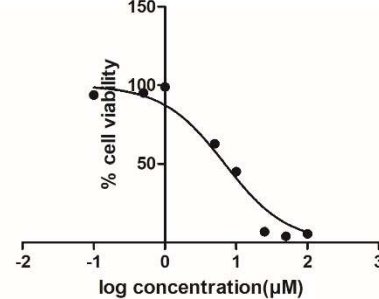

**Afatinib (IC<sub>50</sub>):**

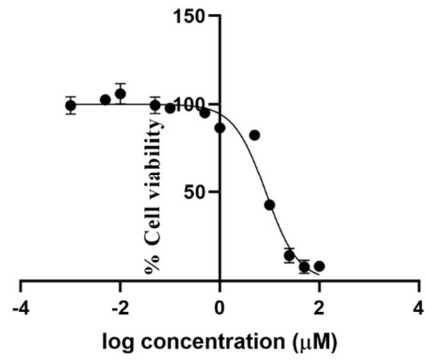

**A549 Cells**

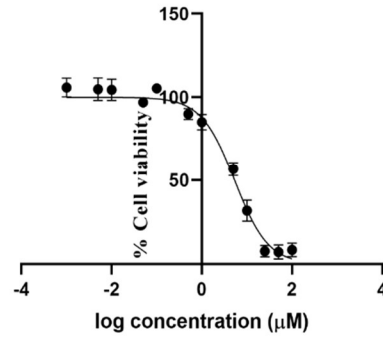

**NCI-5H22 Cells**

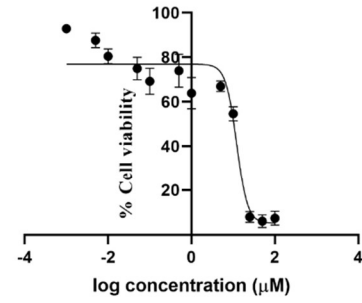

**Normal lung fibroblast cells**

**Gefitinib (IC<sub>50</sub>):**

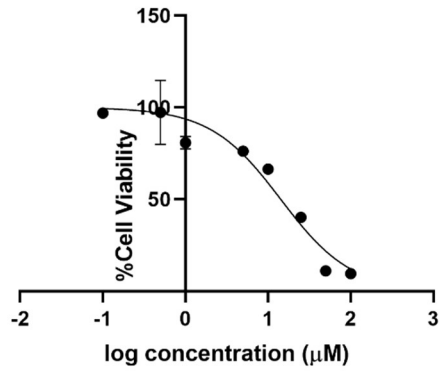

**A549 Cells**

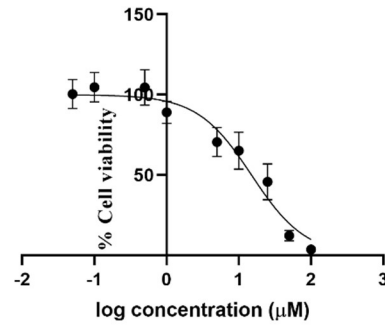

**NCI-5H22 Cells**

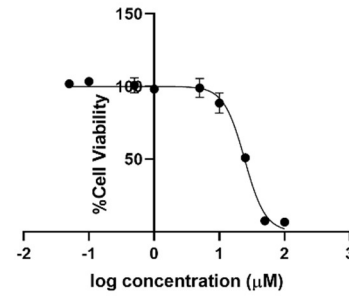

**Normal lung fibroblast cells**

## 2. Cell cycle analysis data

### a) Effects of pyrazolone P7 on the cell cycle progression of NCI-H522 cells:

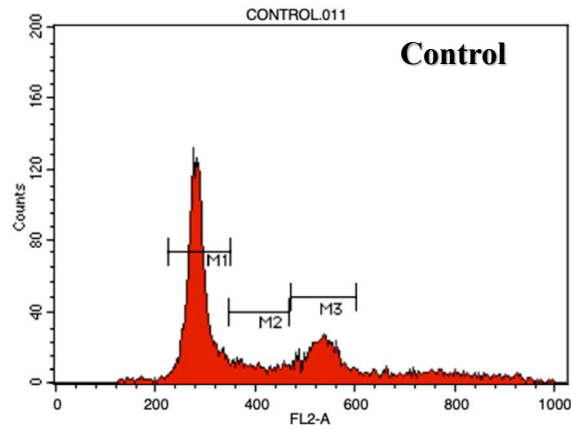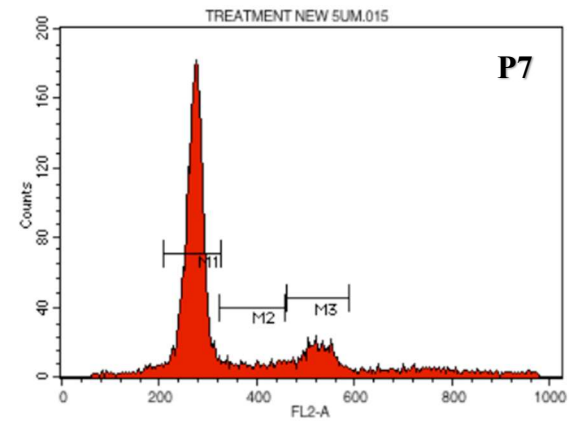

### b) Effects of pyrazolone P11 on the cell cycle progression of NCI-H522 cells:

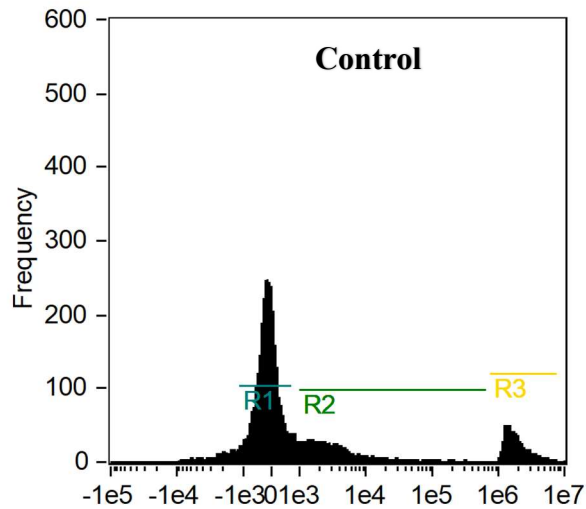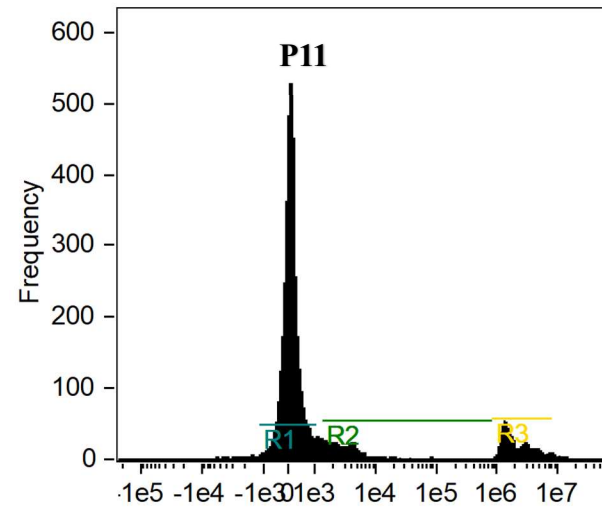

c) Effects of pyrazolones P13 and P14 on the cell cycle progression of NCI-H522 cells:

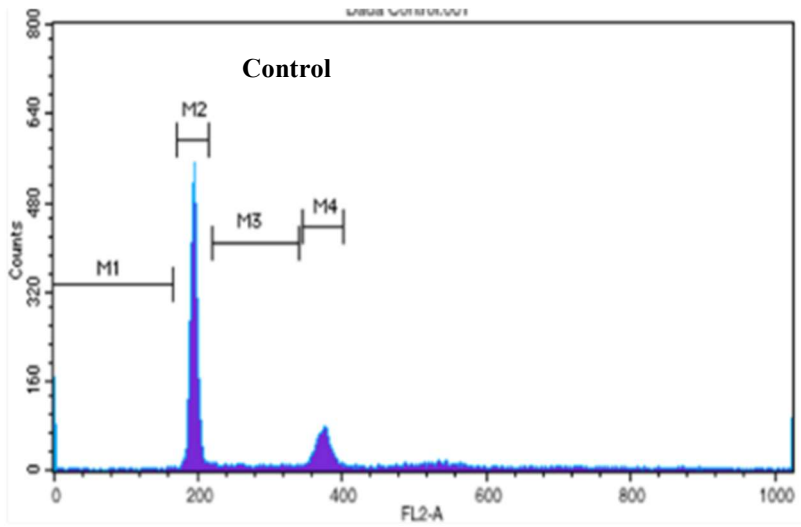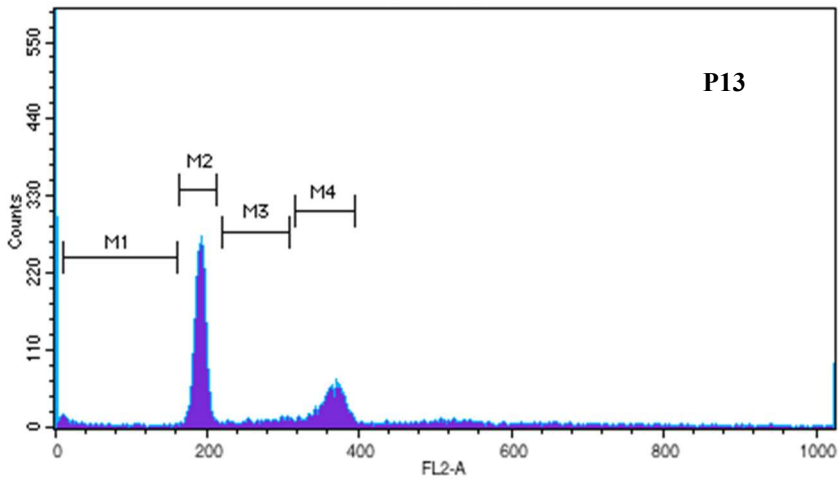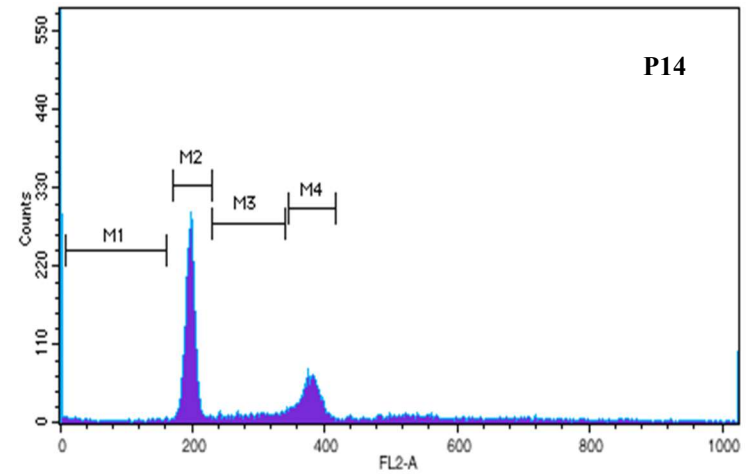

#### 4. NMR and HRMS (ESI-MS) Spectra of the Products

##### 4-hydroxy-4,5-dimethyl-2-phenyl-2,4-dihydro-3H-pyrazol-3-one (P1): $^1\text{H-NMR}$ ( $\text{CDCl}_3$ )

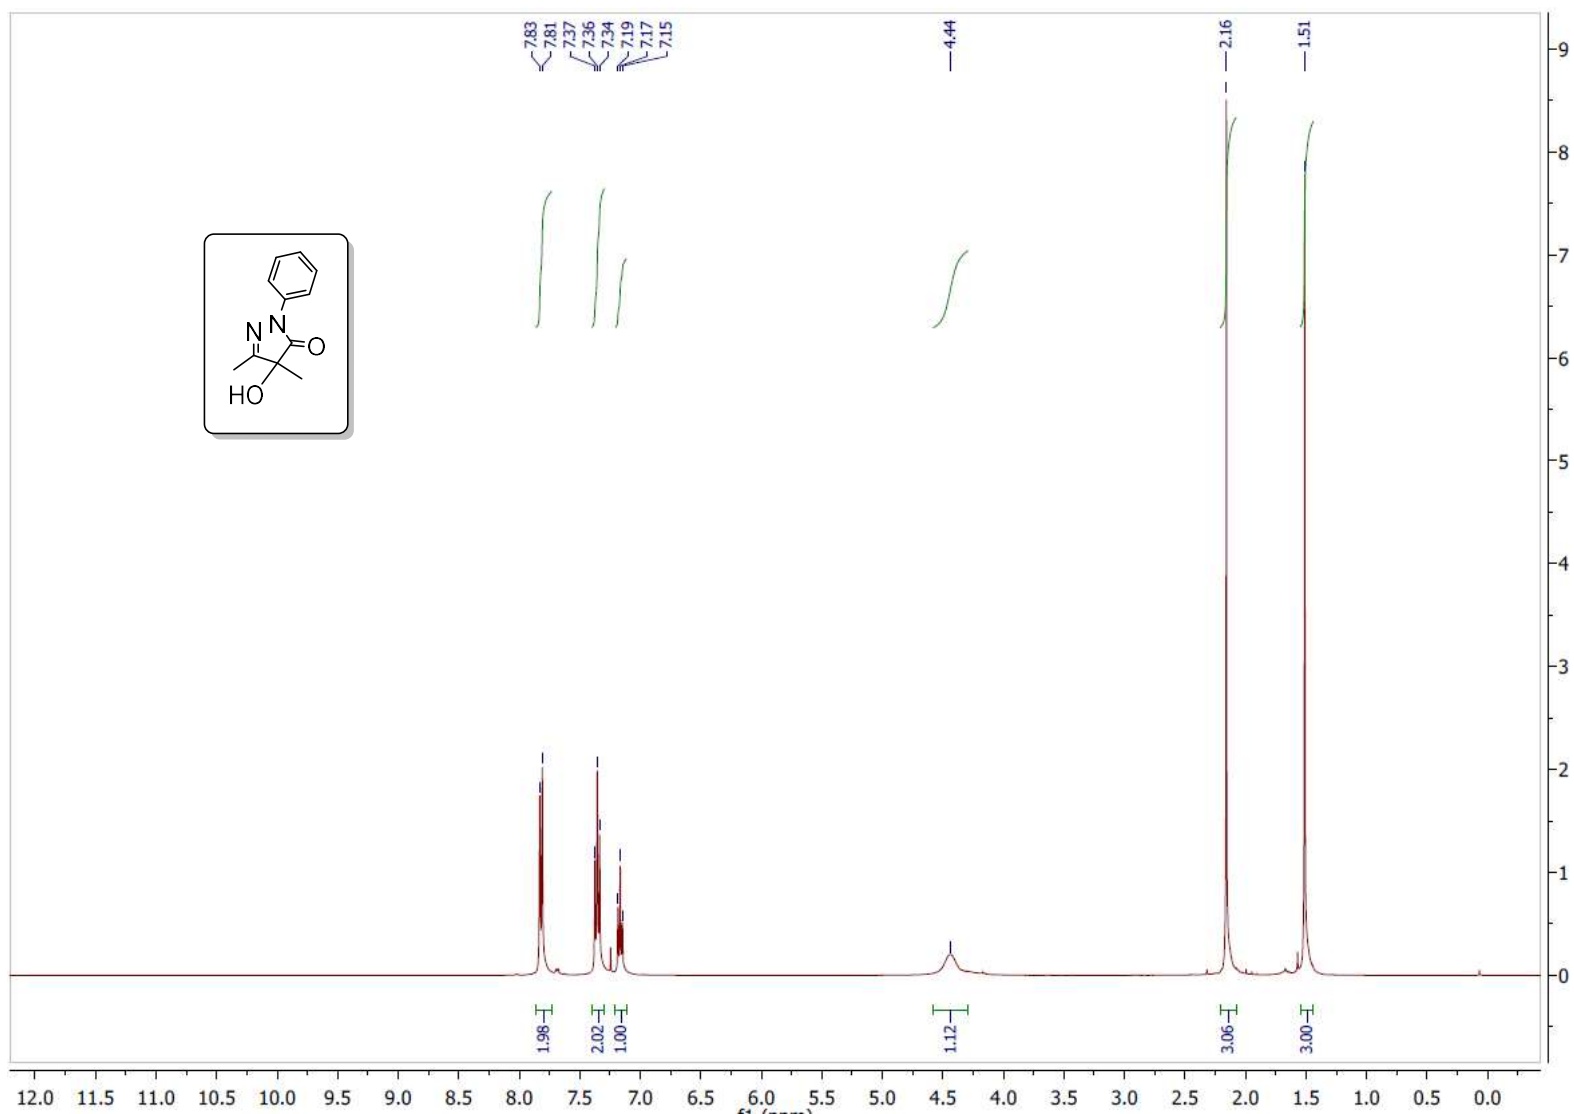



4-hydroxy-4,5-dimethyl-2-phenyl-2,4-dihydro-3H-pyrazol-3-one (P1):  $^{13}\text{C}$ -NMR ( $\text{CDCl}_3$ )

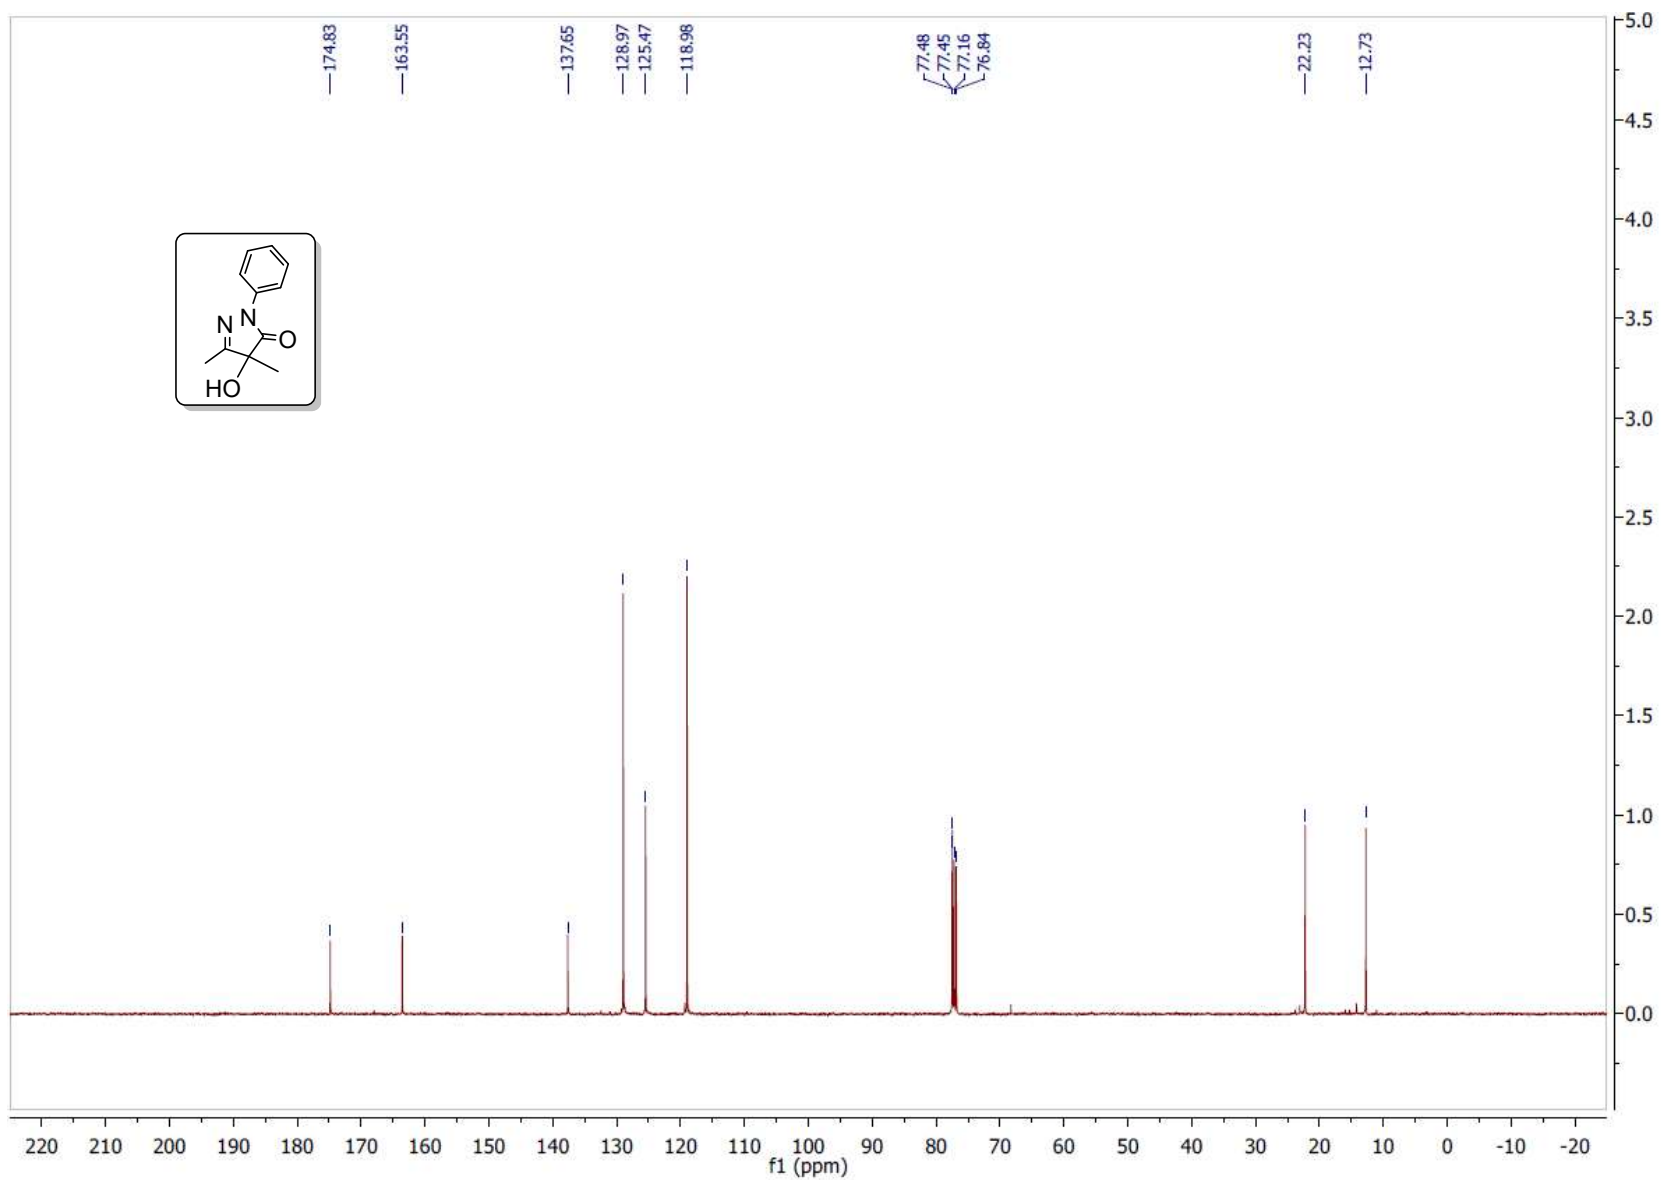

4-hydroxy-4,5-dimethyl-2-phenyl-2,4-dihydro-3H-pyrazol-3-one (P1): ESI-MS

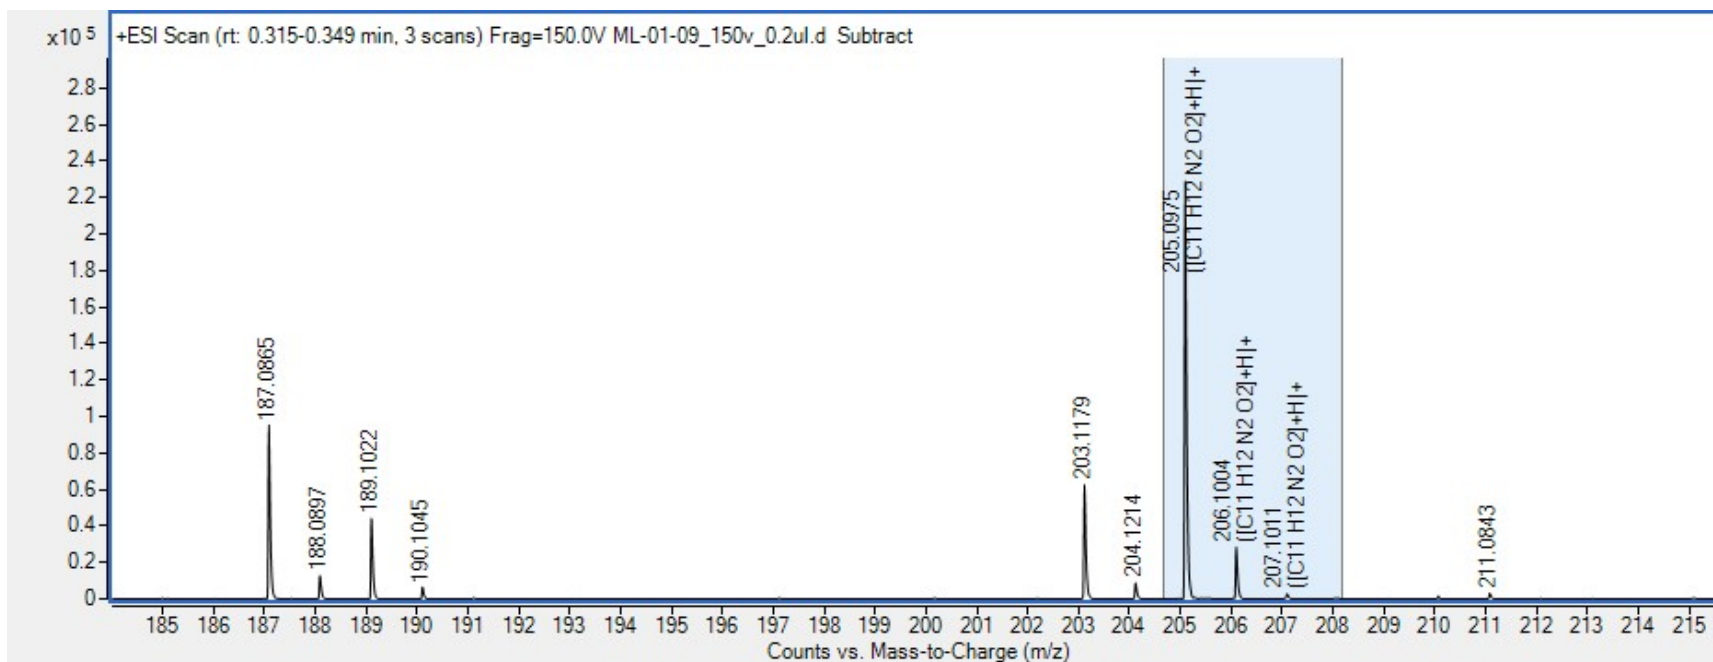

| Formula       | Species            | m/z      | Score | Diff (abs. ppm) | Mass     |
|---------------|--------------------|----------|-------|-----------------|----------|
| C11 H12 N2 O2 | (M+H) <sup>+</sup> | 205.0975 | 99.42 | 1.62            | 204.0902 |

2-phenyl-5-propyl-2,4-dihydro-3H-pyrazol-3-one (P2):  $^1\text{H-NMR}$  ( $\text{CDCl}_3$ )

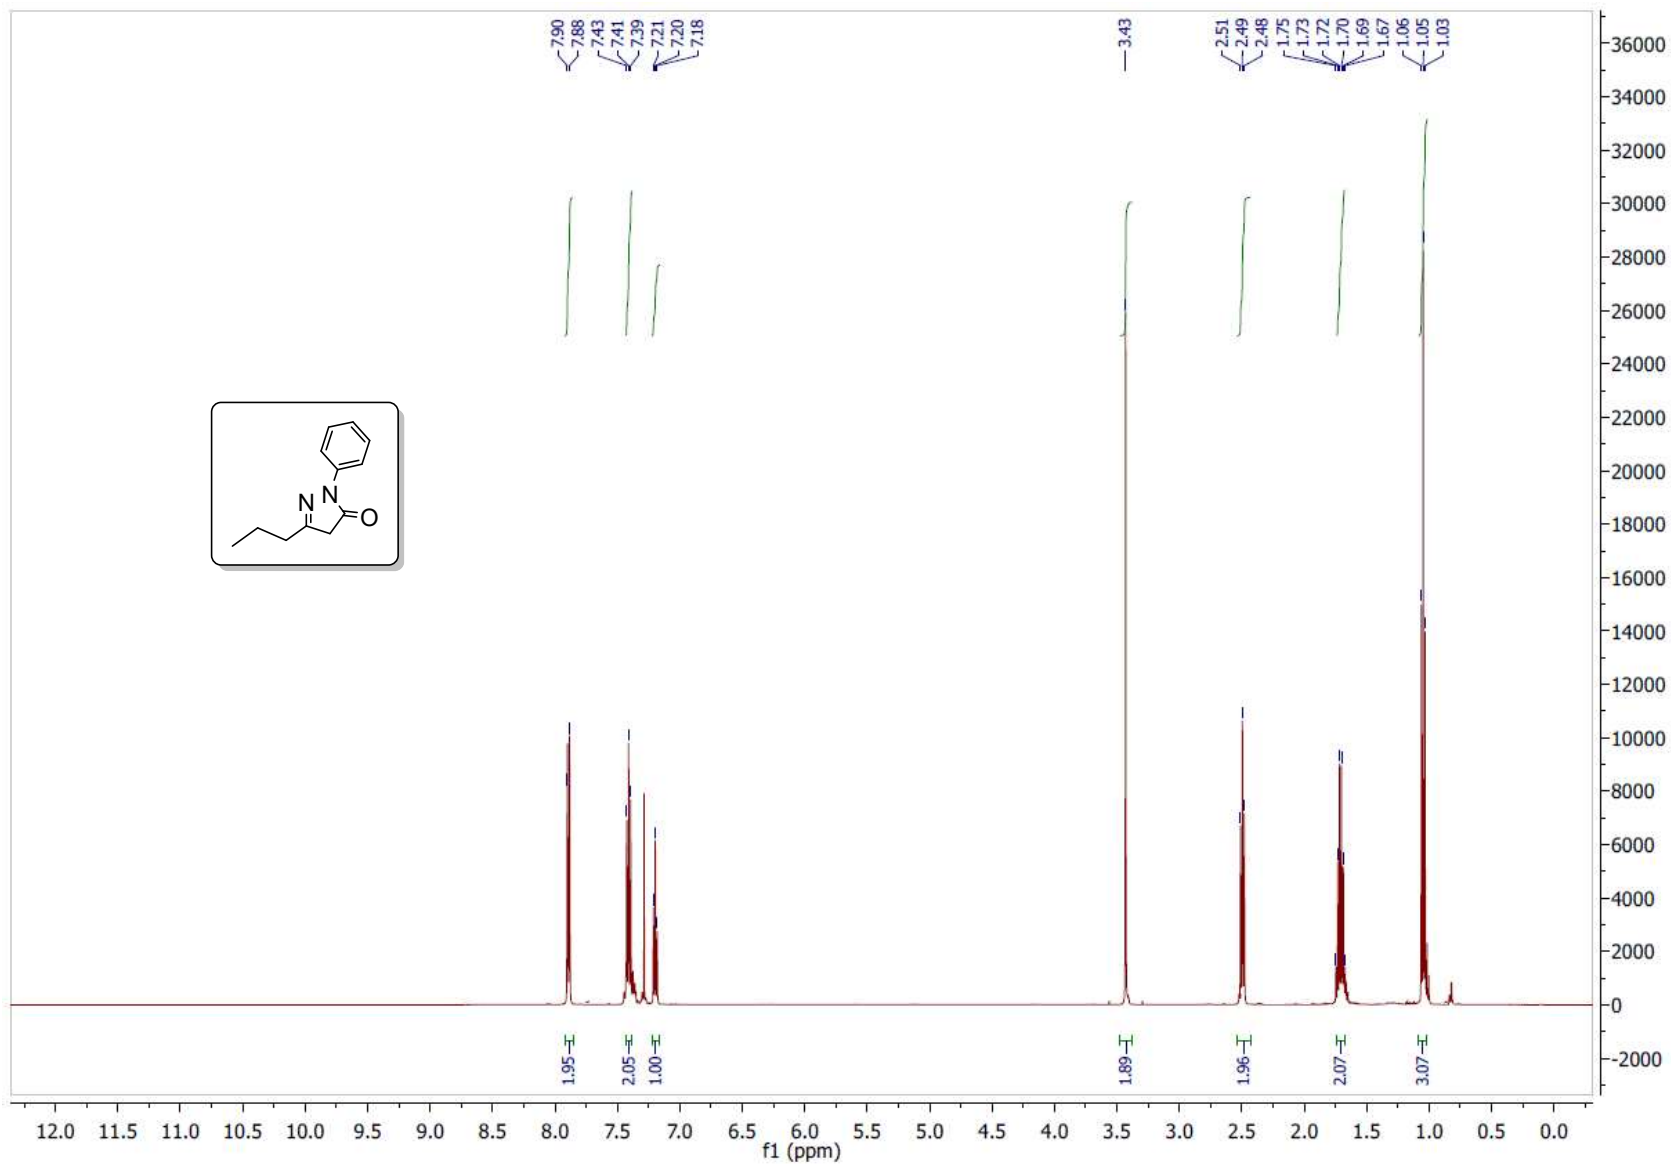

2-phenyl-5-propyl-2,4-dihydro-3H-pyrazol-3-one (P2):  $^{13}\text{C}$ -NMR ( $\text{CDCl}_3$ )

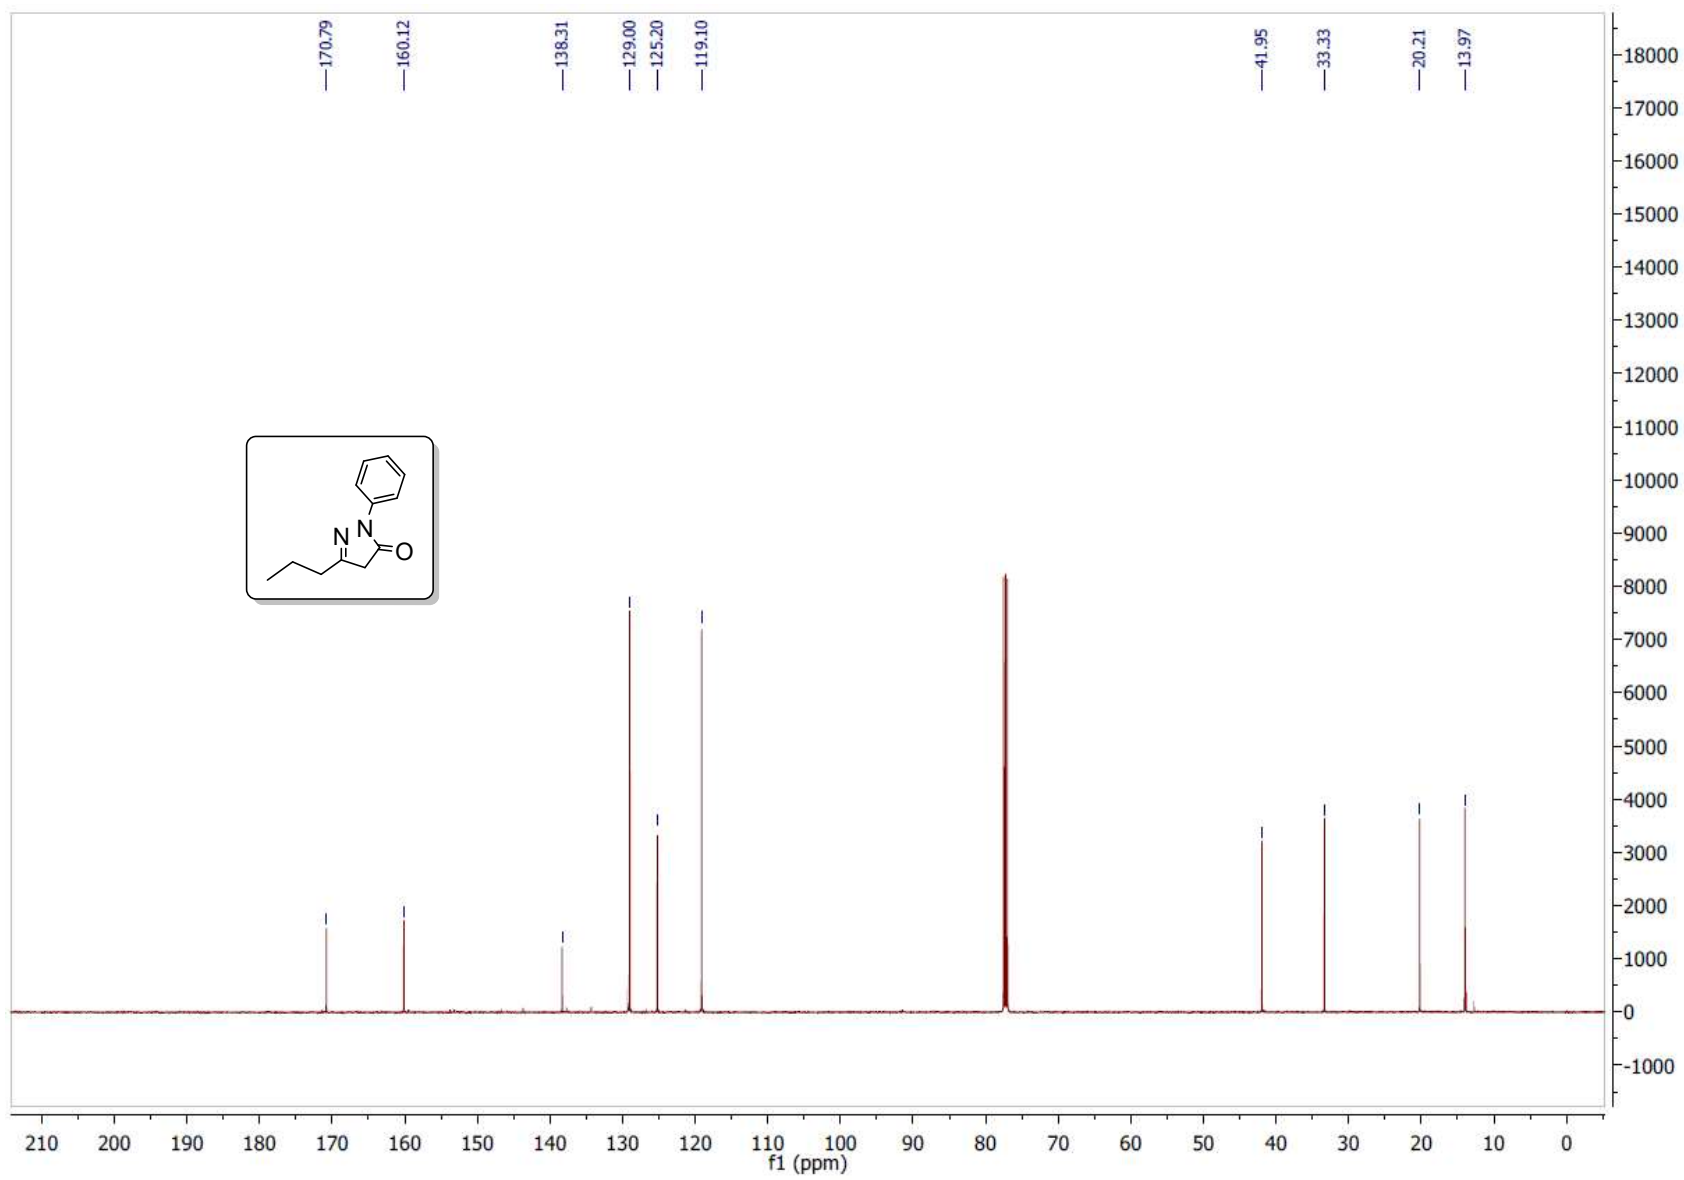

## 2-phenyl-5-propyl-2,4-dihydro-3H-pyrazol-3-one (P2): ESI-MS

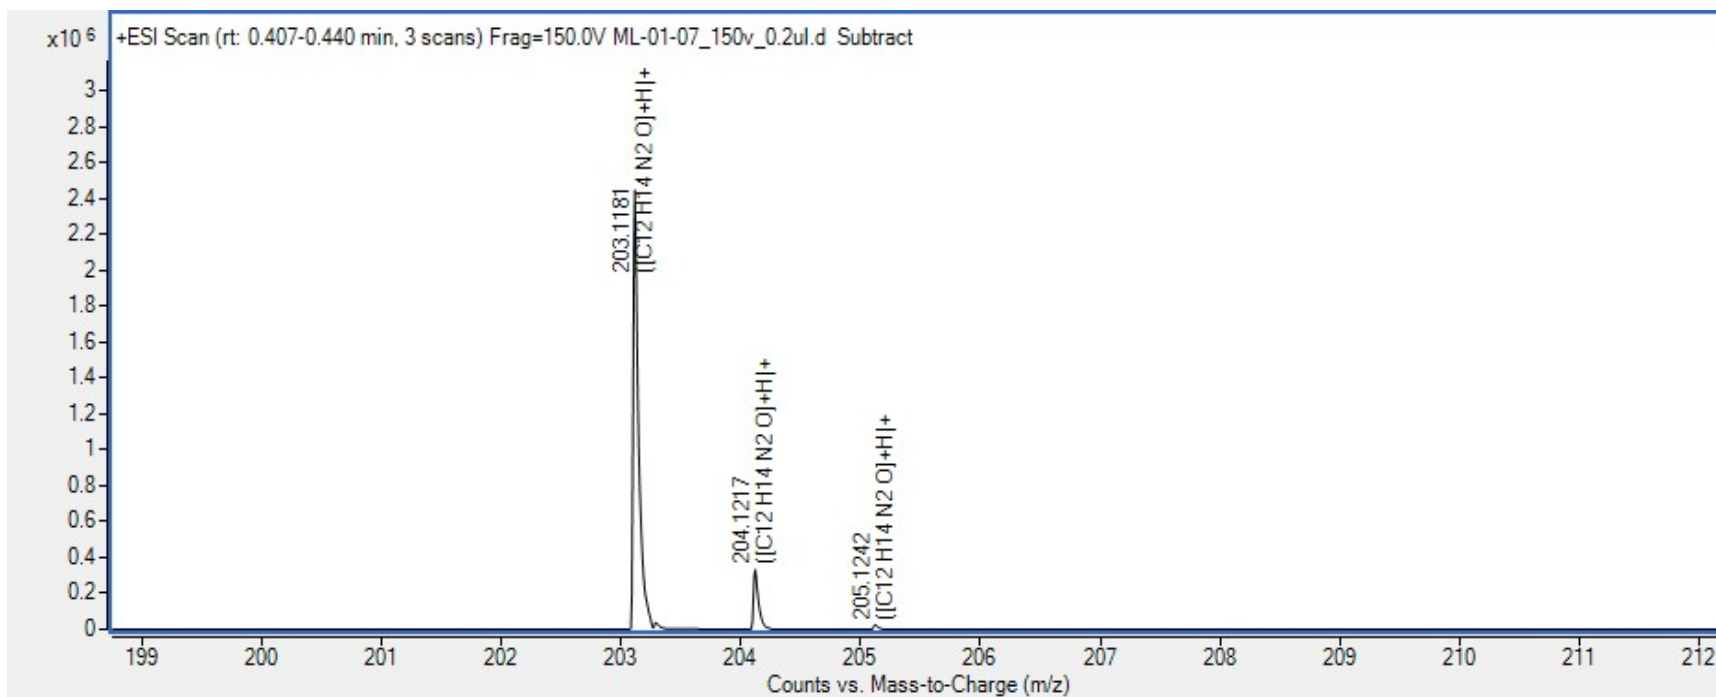

| Formula,      | Species, | m/z,      | Score, | Diff (abs. ppm), | Mass     |
|---------------|----------|-----------|--------|------------------|----------|
| C12 H14 N2 O, | (M+H)+,  | 203.1181, | 98.94, | 1.5,             | 202.1109 |

2,5-diphenyl-2,4-dihydro-3H-pyrazol-3-one (P3):  $^1\text{H-NMR}$  ( $\text{CDCl}_3$ )

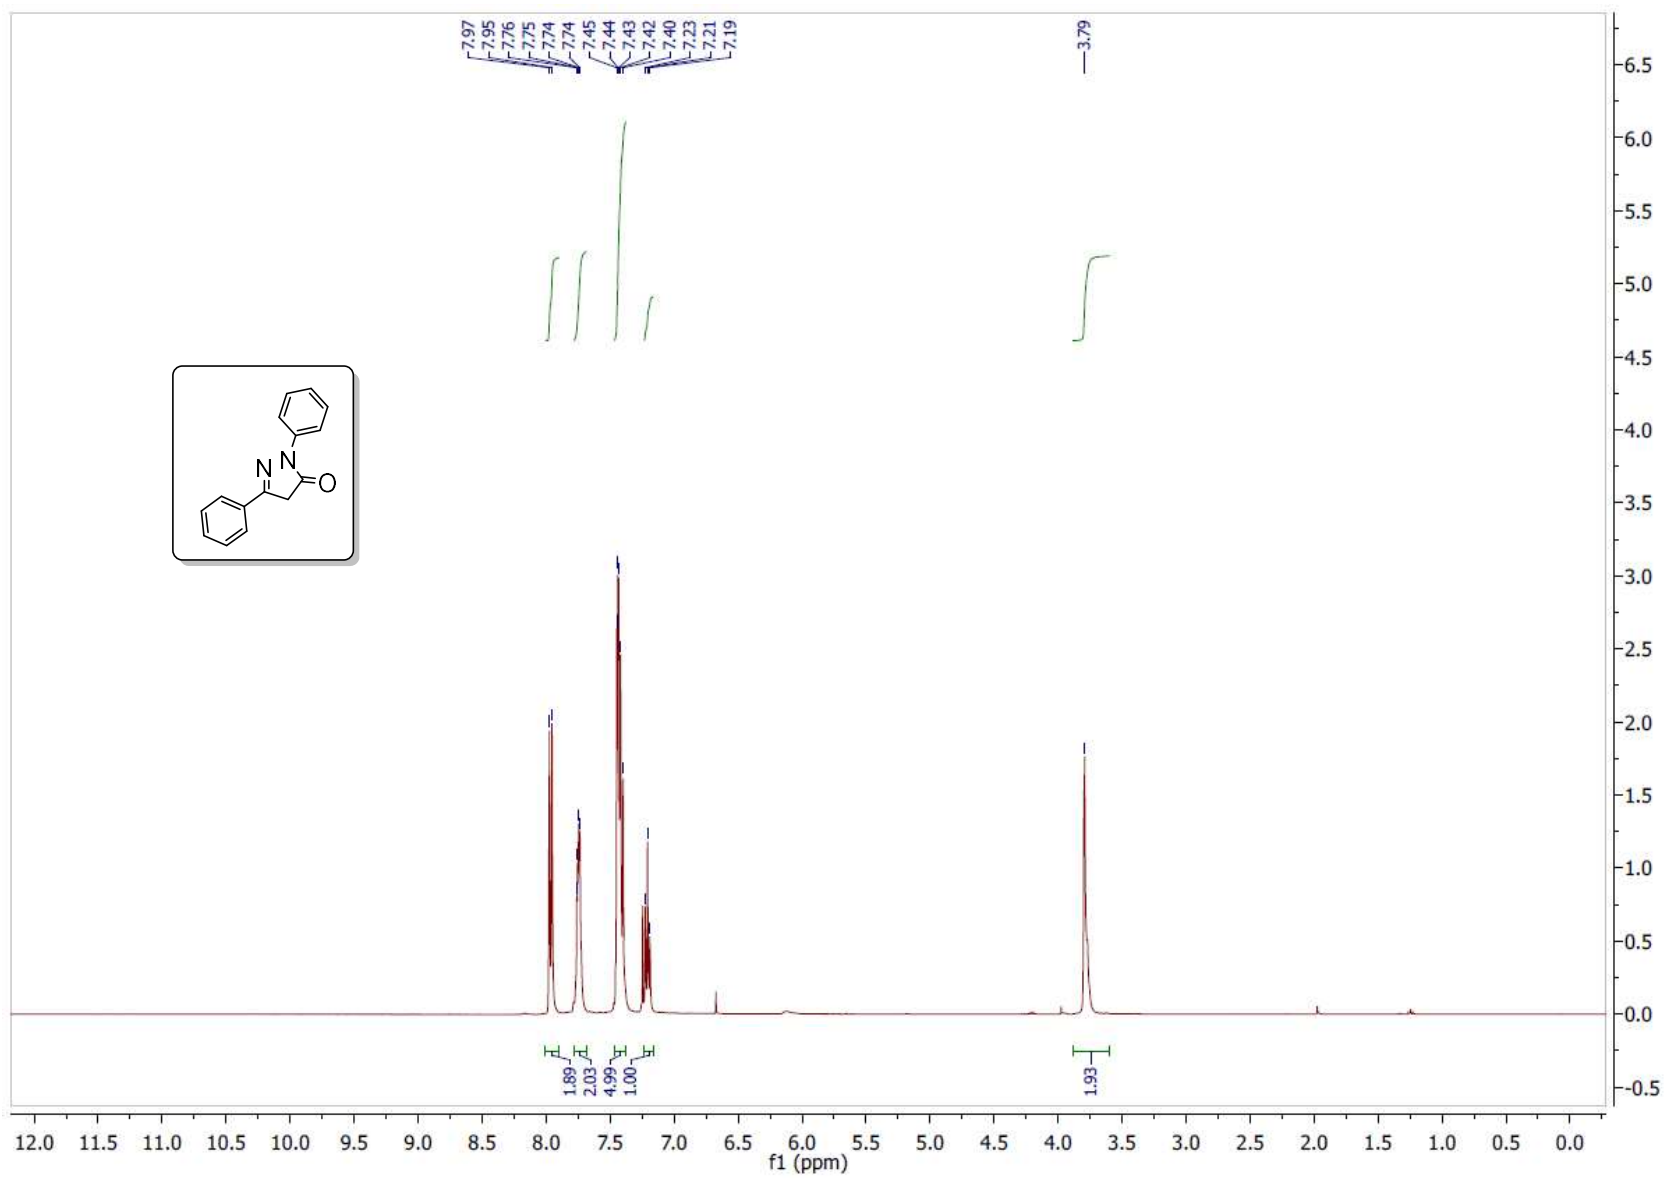

2,5-diphenyl-2,4-dihydro-3H-pyrazol-3-one (P3):  $^{13}\text{C}$ -NMR ( $\text{CDCl}_3$ )

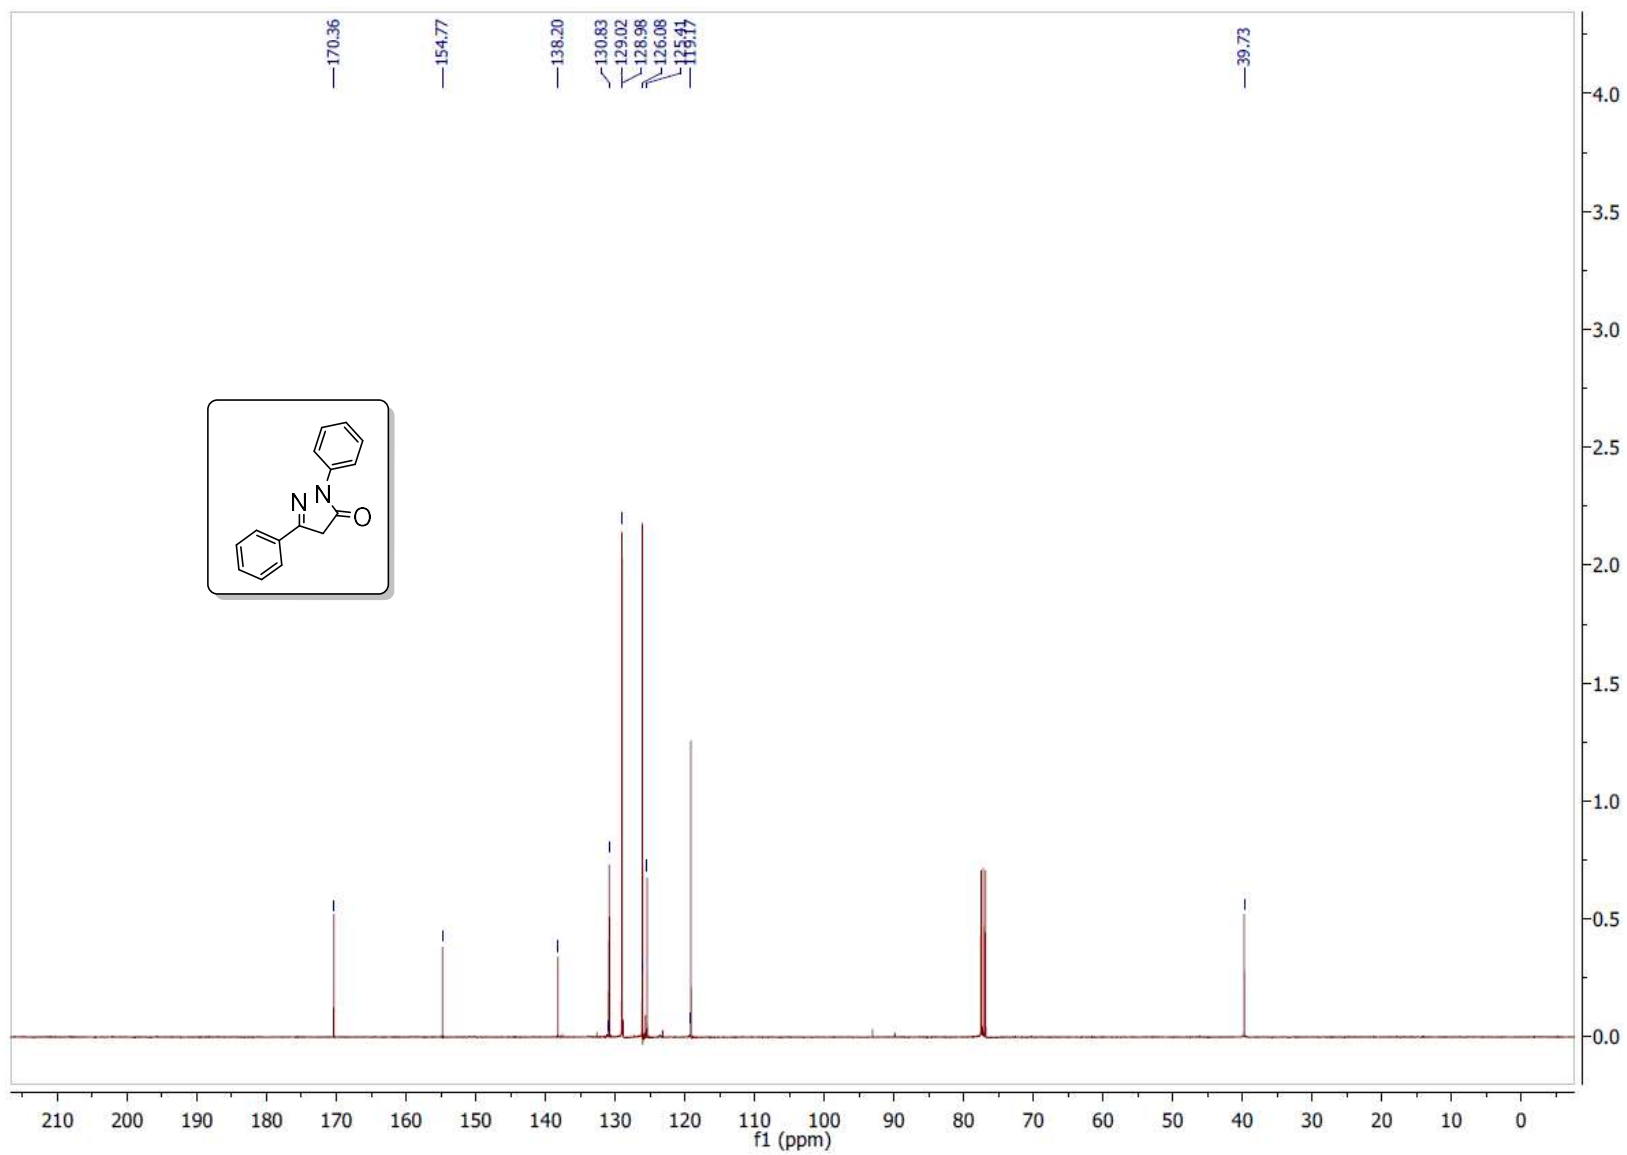

### 2,5-diphenyl-2,4-dihydro-3H-pyrazol-3-one (P3): ESI-MS

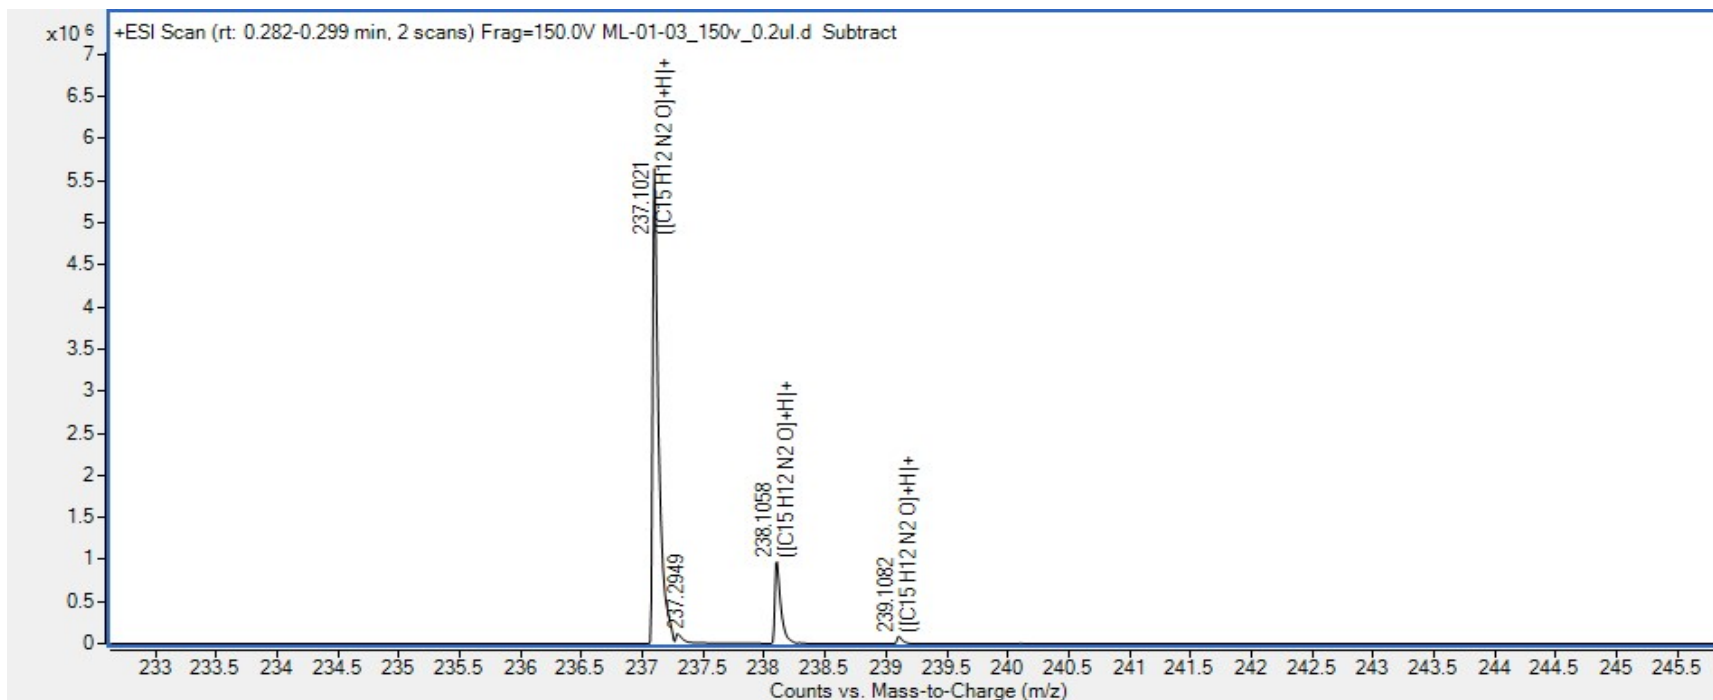

| Formula      | Species            | m/z      | Score | Diff (abs. ppm) | Mass     |
|--------------|--------------------|----------|-------|-----------------|----------|
| C15 H12 N2 O | (M+H) <sup>+</sup> | 237.1021 | 99.46 | 0.16            | 236.0949 |



2-(4-bromophenyl)-5-phenyl-2,4-dihydro-3H-pyrazol-3-one (P4):  $^1\text{H-NMR}$  ( $\text{CDCl}_3$ )

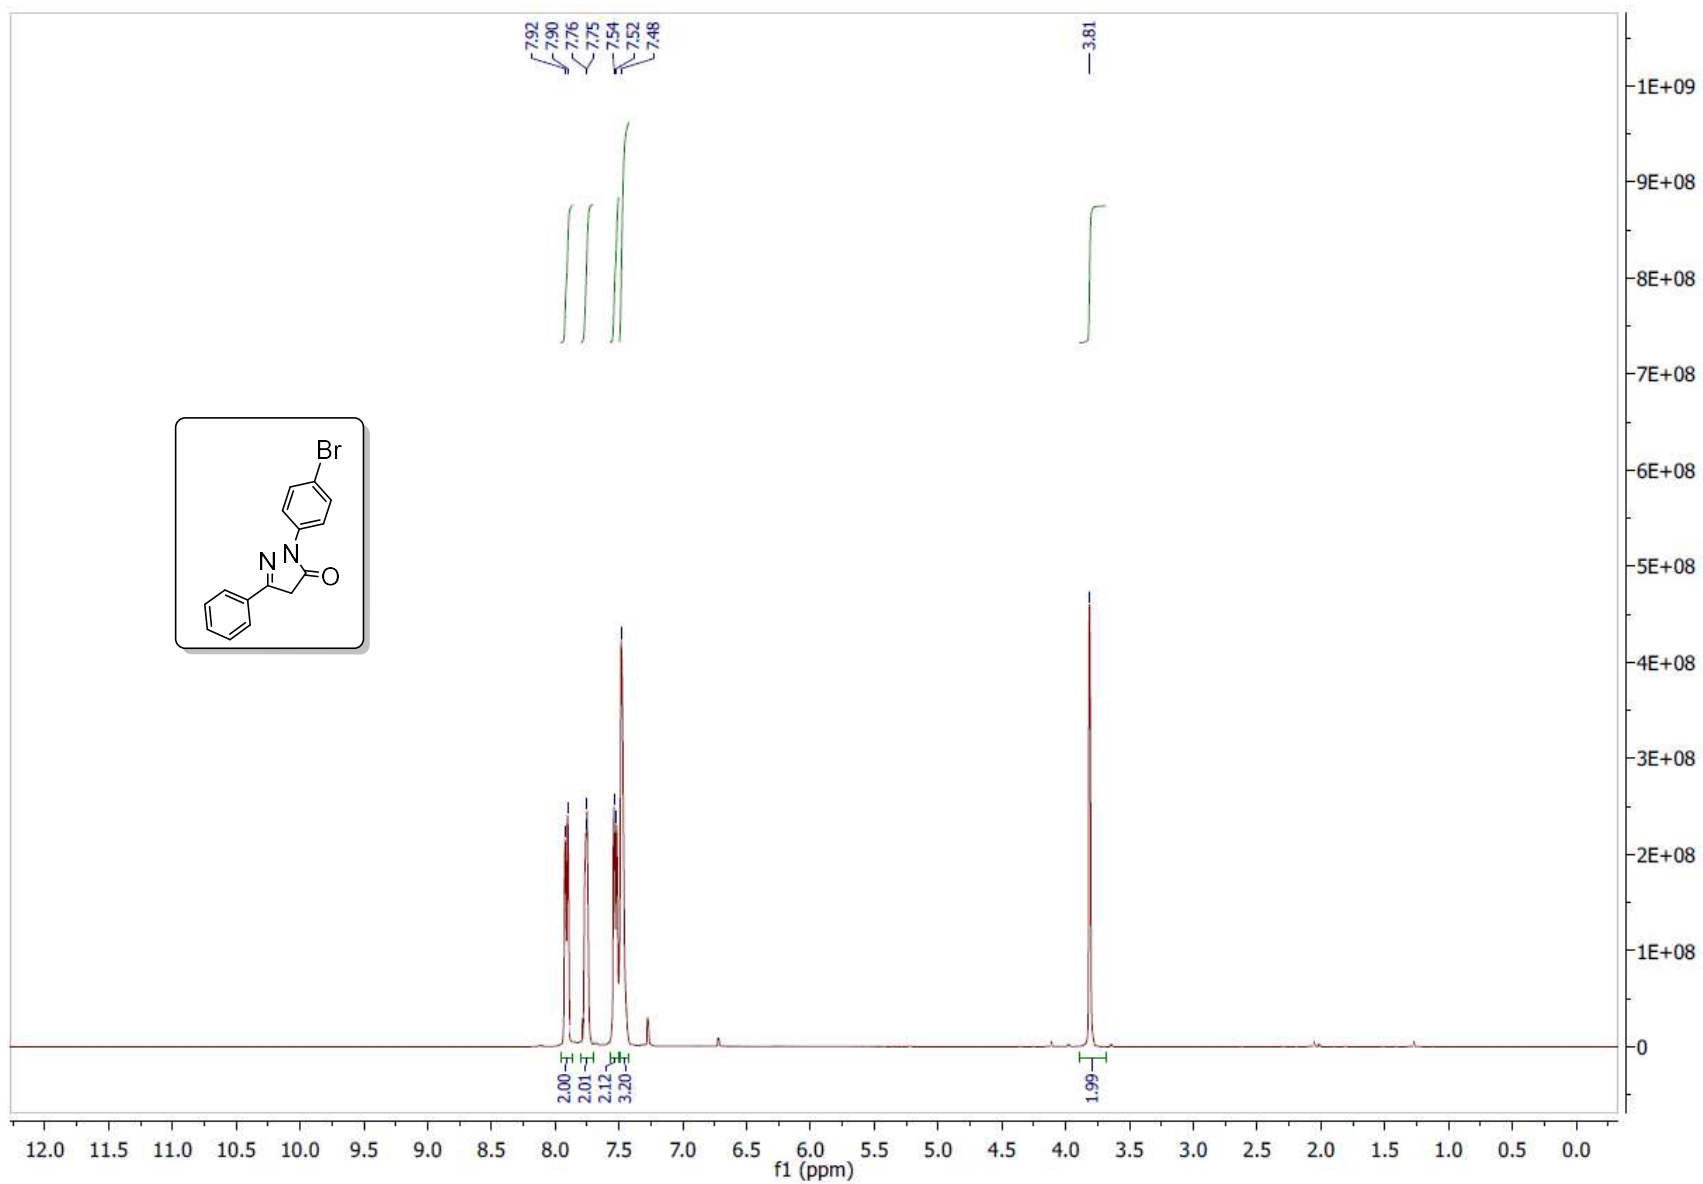

2-(4-bromophenyl)-5-phenyl-2,4-dihydro-3H-pyrazol-3-one (P4):  $^{13}\text{C}$ -NMR ( $\text{CDCl}_3$ )

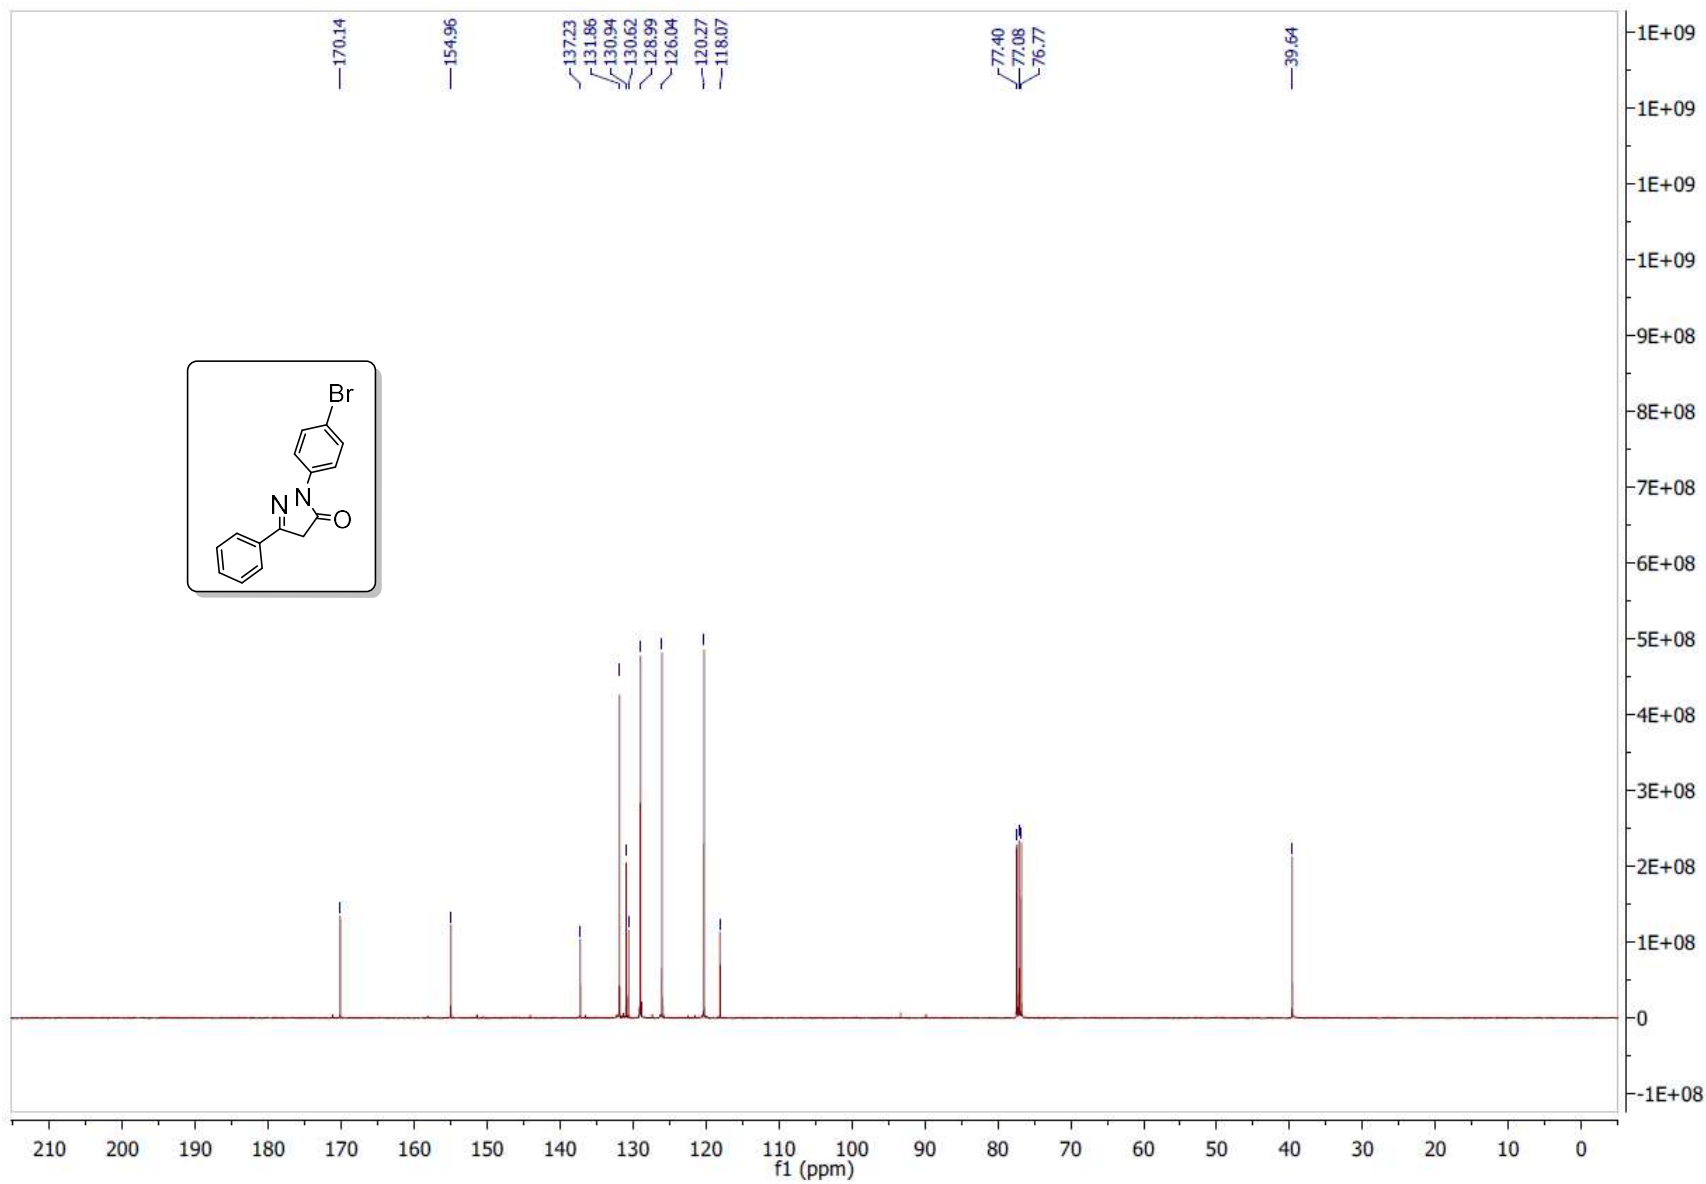

**2-(4-bromophenyl)-5-phenyl-2,4-dihydro-3H-pyrazol-3-one (P4): ESI-MS**

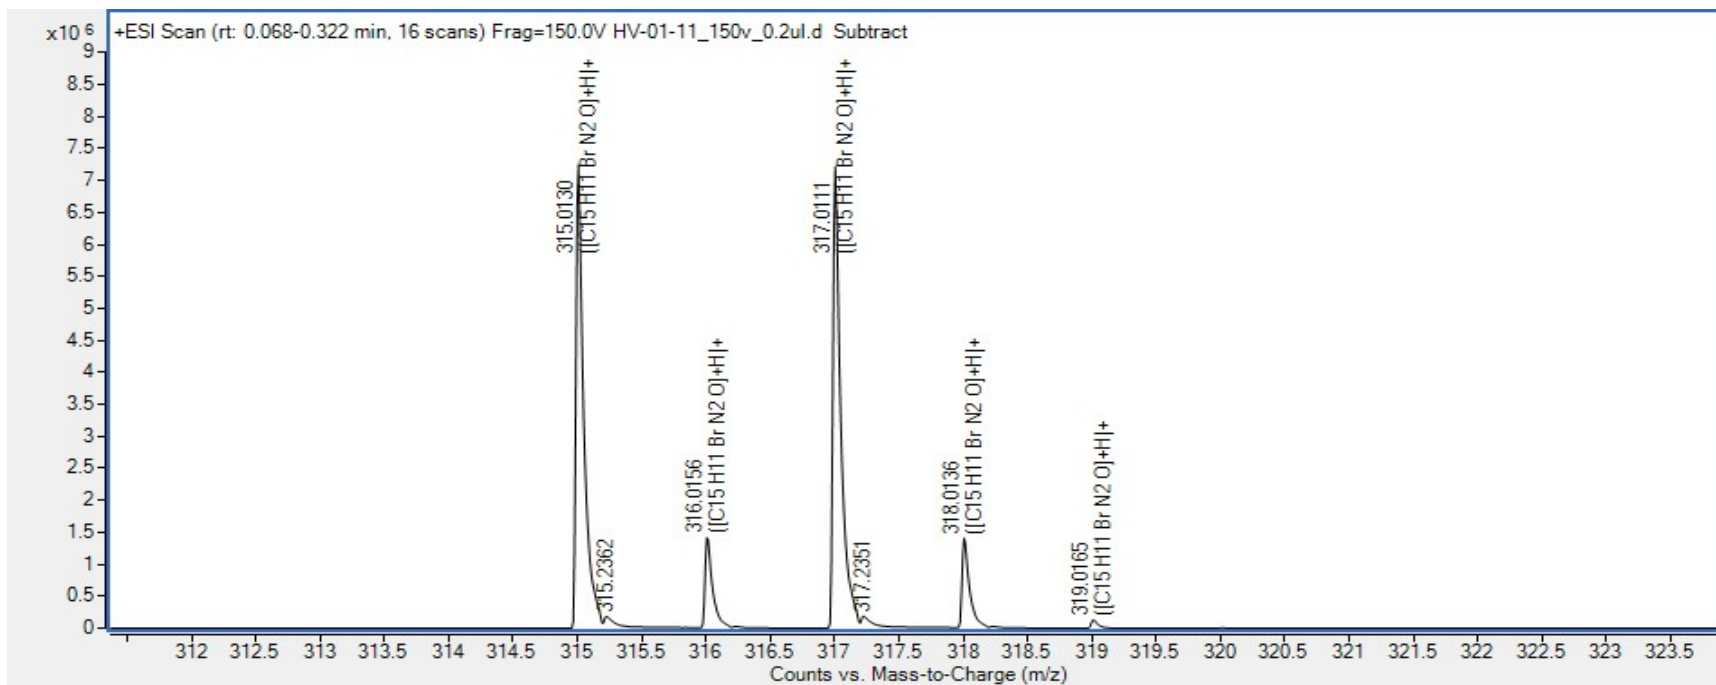

| Formula,         | Species, | m/z,      | Score, | Diff (abs. ppm), | Mass     |
|------------------|----------|-----------|--------|------------------|----------|
| C15 H11 Br N2 O, | (M+H)+,  | 315.0130, | 98.13, | 0.43,            | 314.0056 |

2-(4-chlorophenyl)-5-phenyl-2,4-dihydro-3H-pyrazol-3-one (P5):  $^1\text{H-NMR}$  ( $\text{CDCl}_3$ )

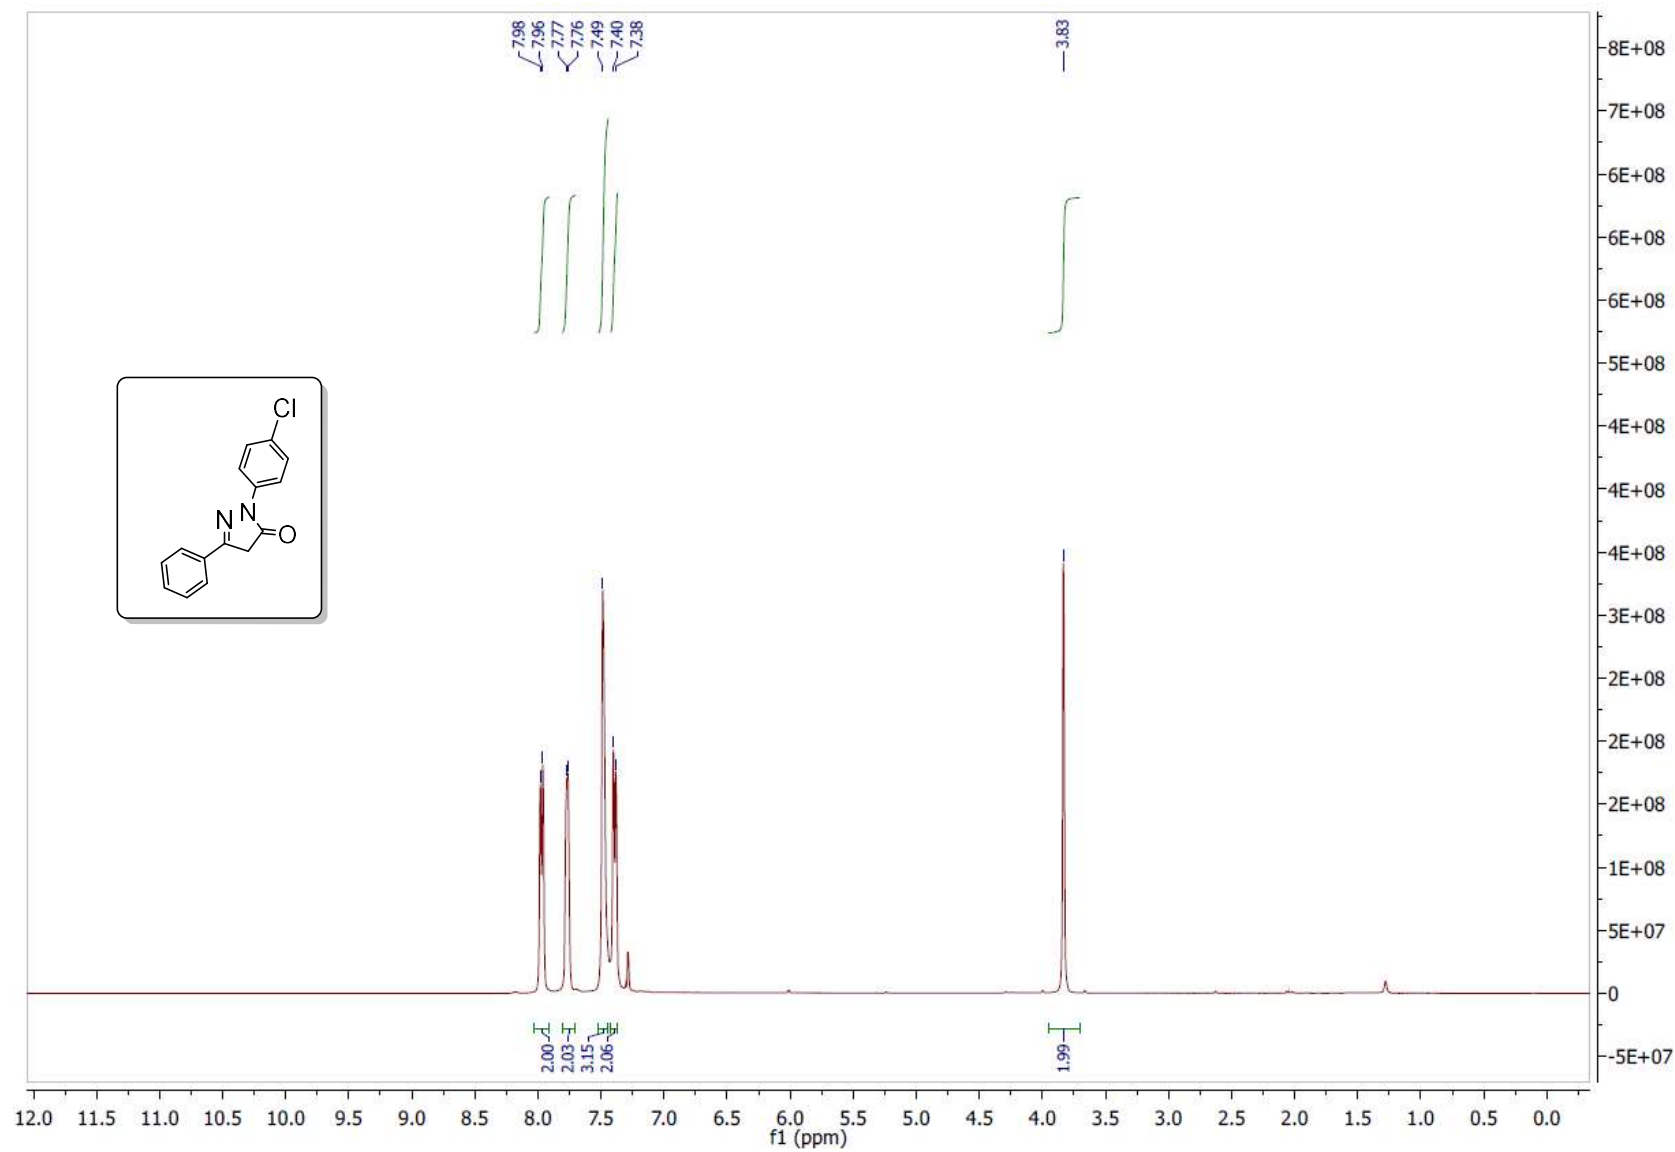

2-(4-chlorophenyl)-5-phenyl-2,4-dihydro-3H-pyrazol-3-one (P5):  $^{13}\text{C}$ -NMR ( $\text{CDCl}_3$ )

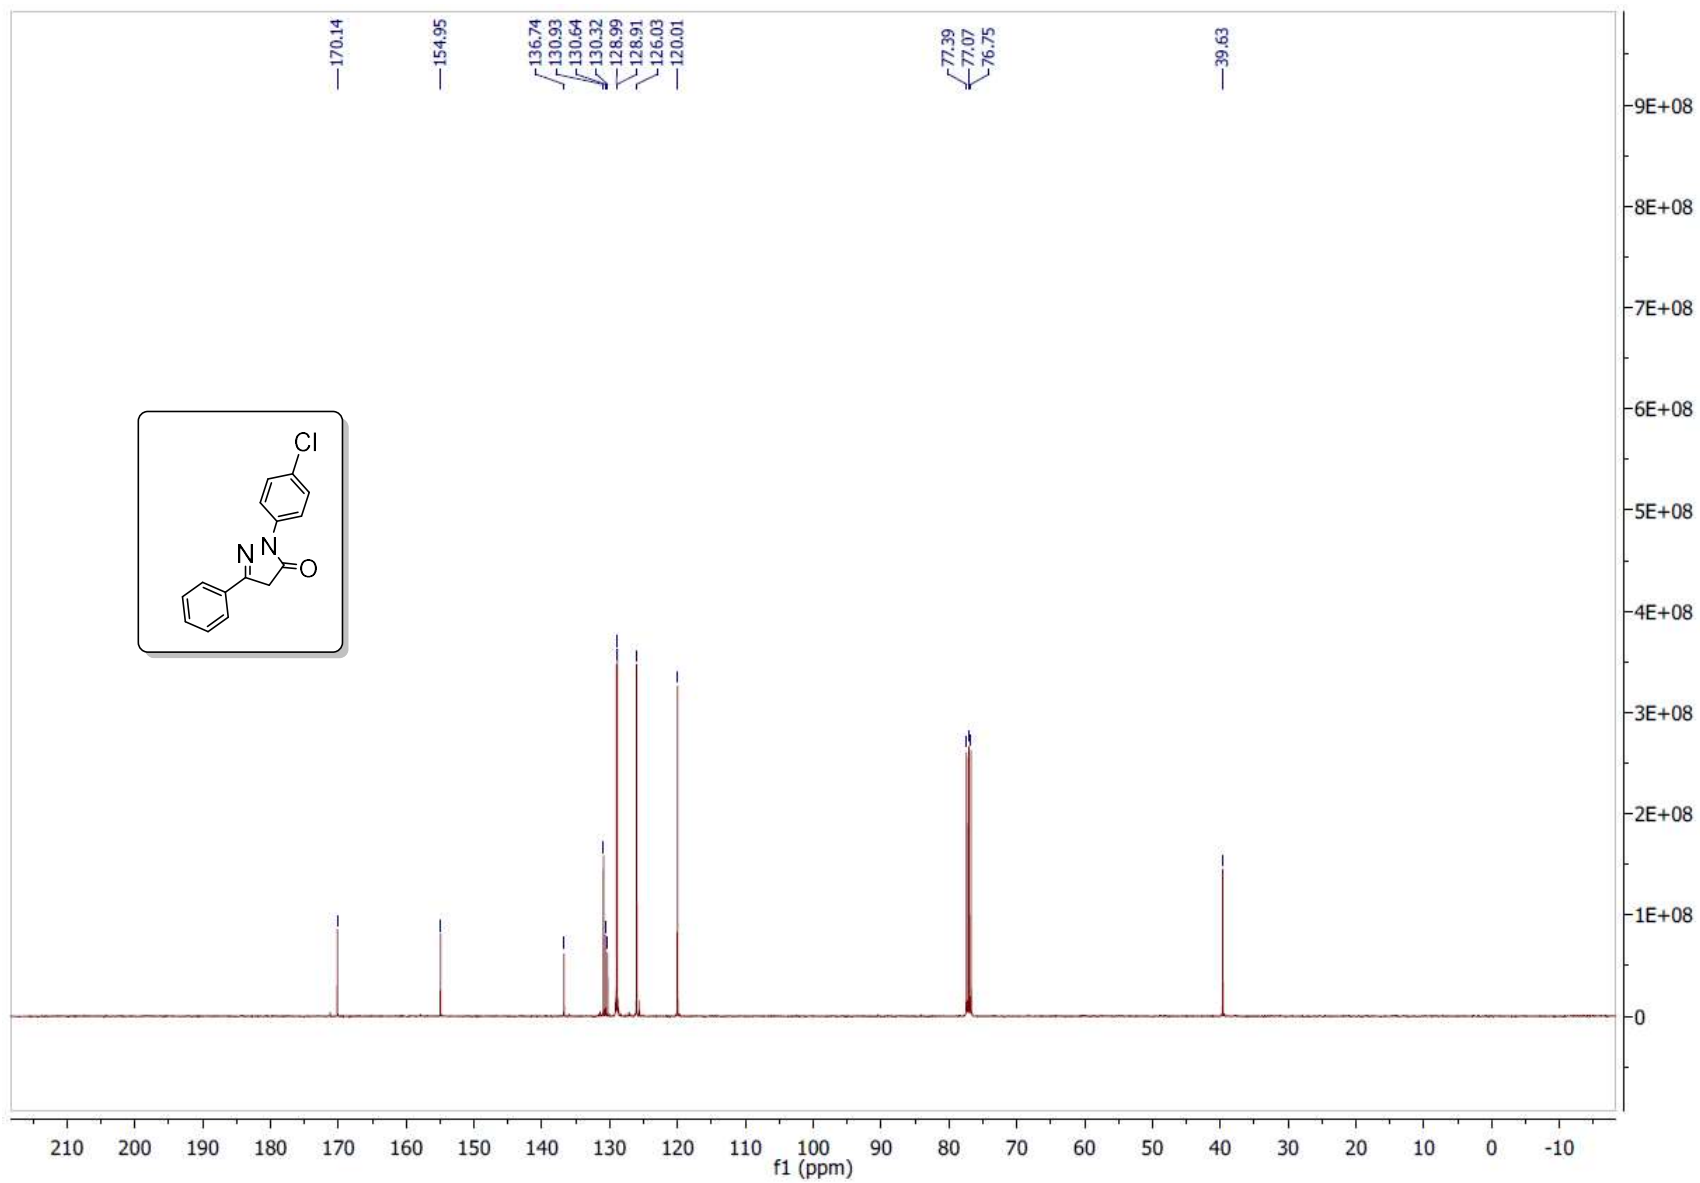

## 2-(4-chlorophenyl)-5-phenyl-2,4-dihydro-3H-pyrazol-3-one (P5): ESI-MS

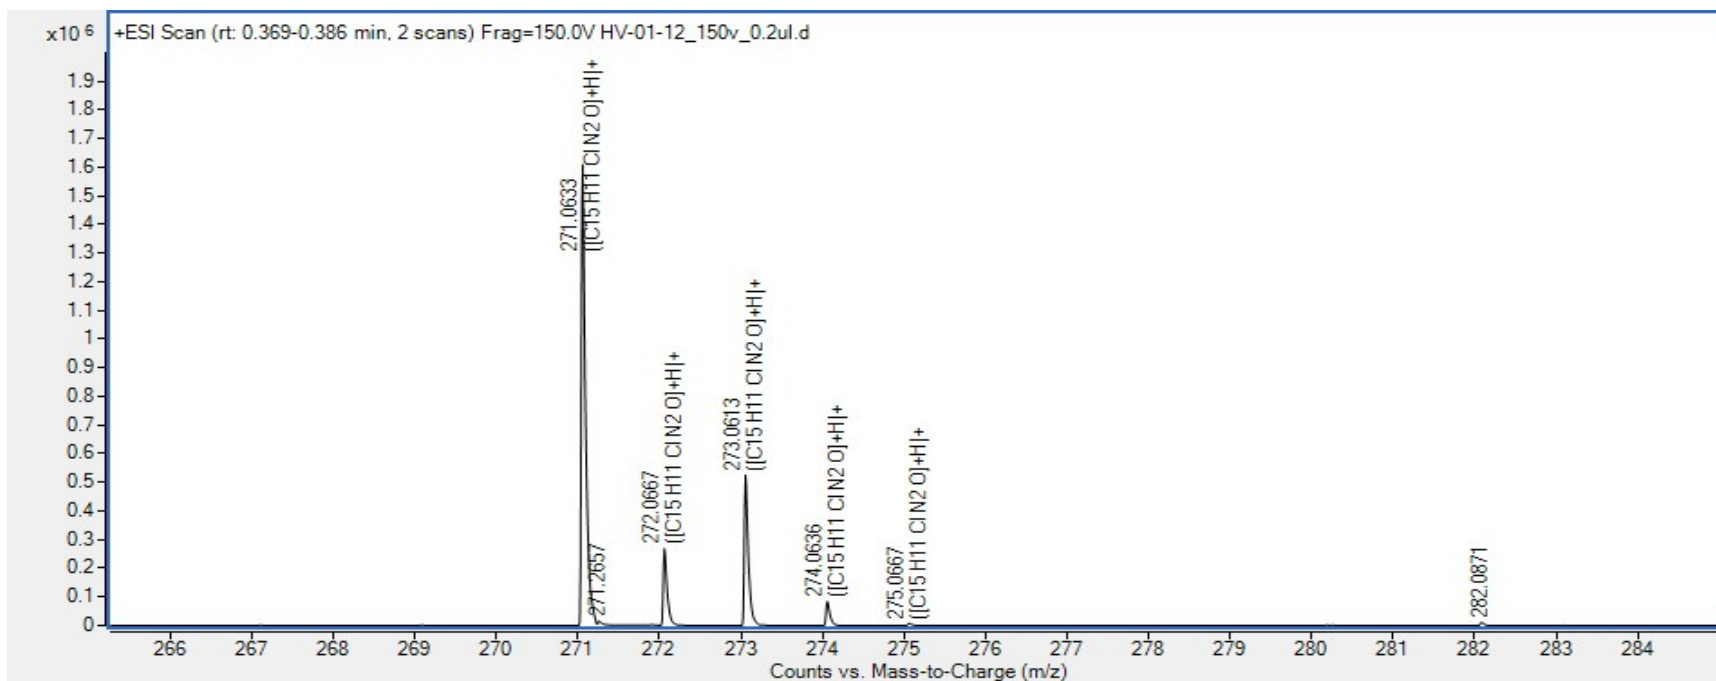

| Formula,         | Species, | m/z,      | Score, | Diff (abs. ppm), | Mass     |
|------------------|----------|-----------|--------|------------------|----------|
| C15 H11 Cl N2 O, | (M+H)+,  | 271.0633, | 99.5,  | 0.76,            | 270.0562 |

5-(4-nitrophenyl)-2-phenyl-2,4-dihydro-3H-pyrazol-3-one (P6):  $^1\text{H-NMR}$  ( $\text{CDCl}_3$ )

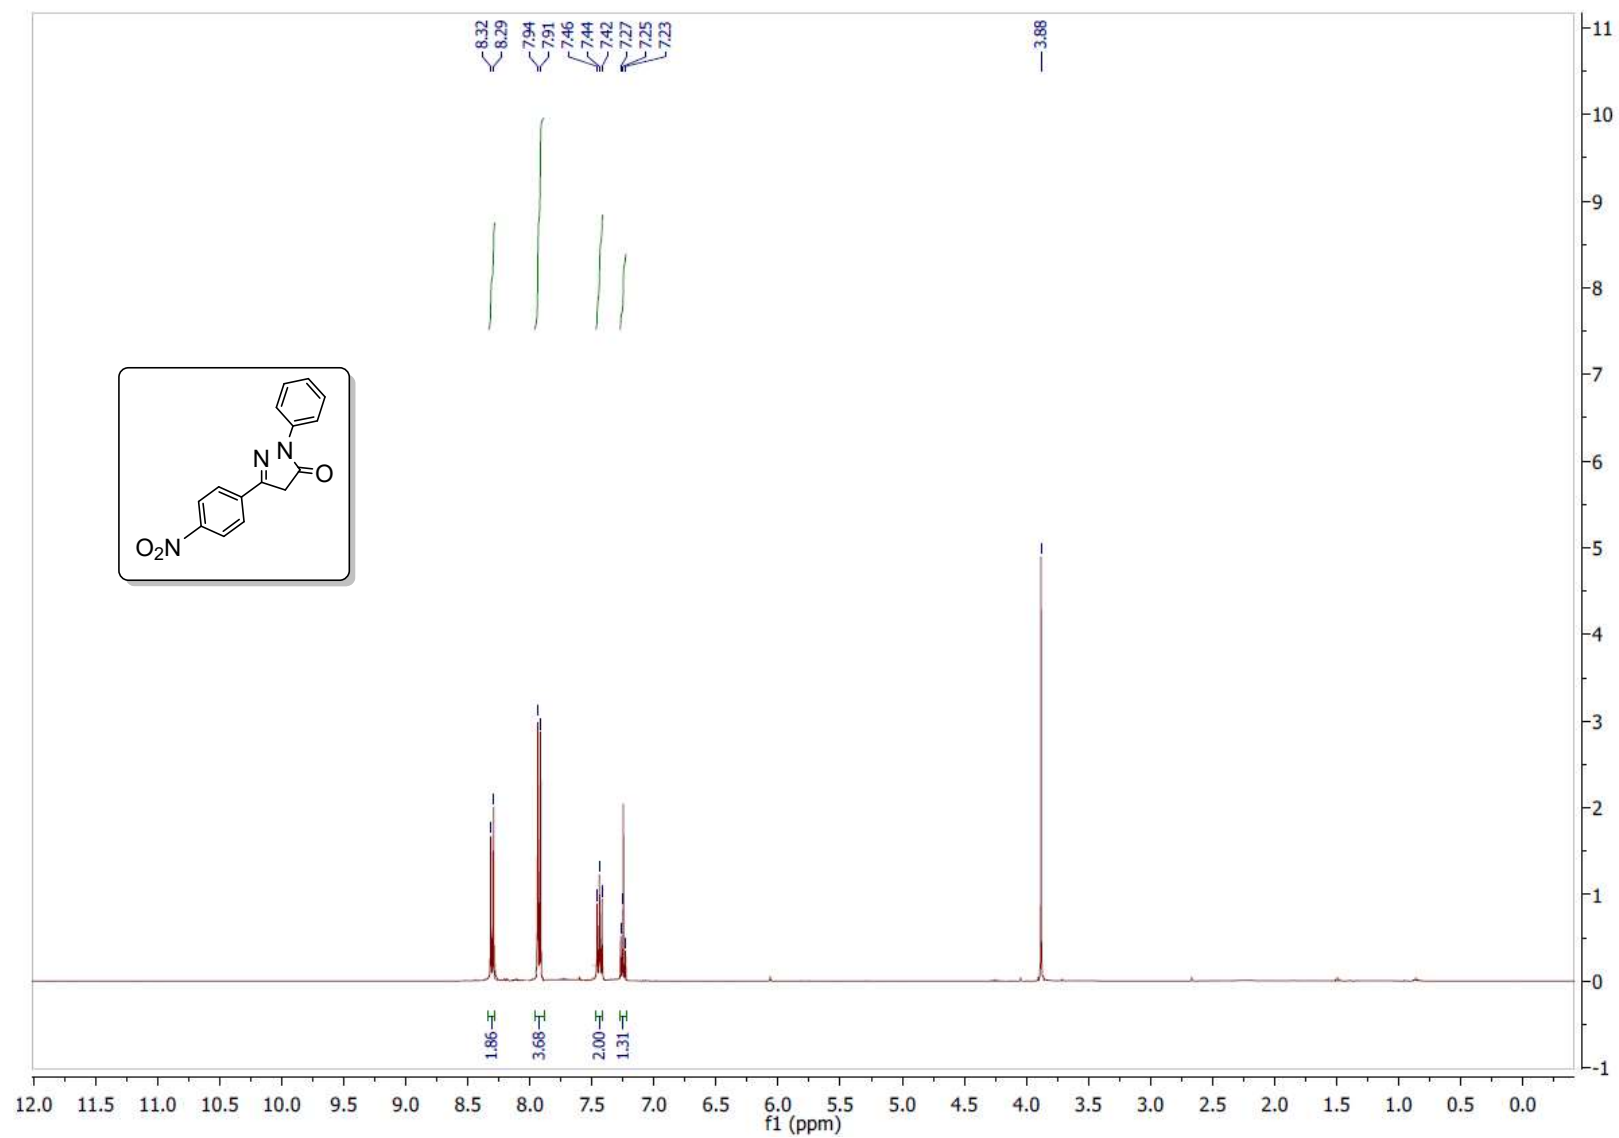

5-(4-nitrophenyl)-2-phenyl-2,4-dihydro-3H-pyrazol-3-one (P6):  $^{13}\text{C}$ -NMR ( $\text{CDCl}_3$ )

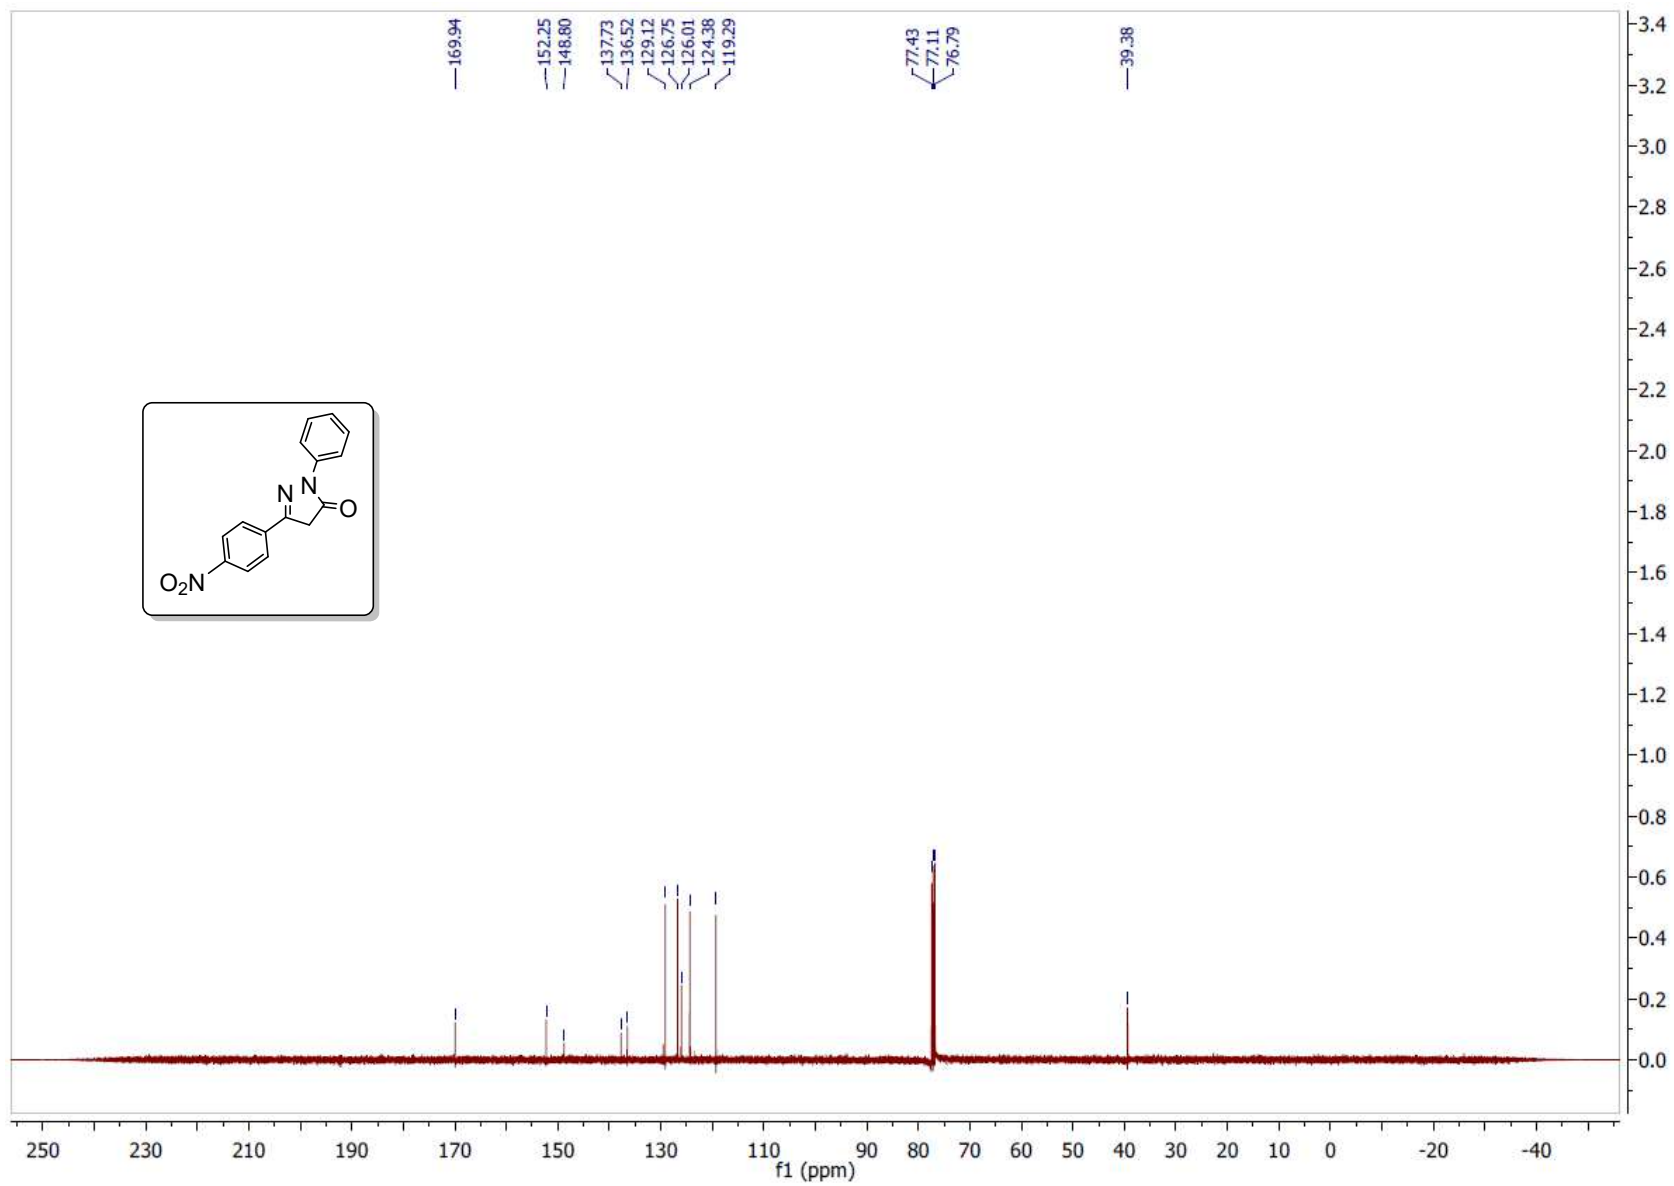



### 5-(4-nitrophenyl)-2-phenyl-2,4-dihydro-3H-pyrazol-3-one (P6): ESI-MS

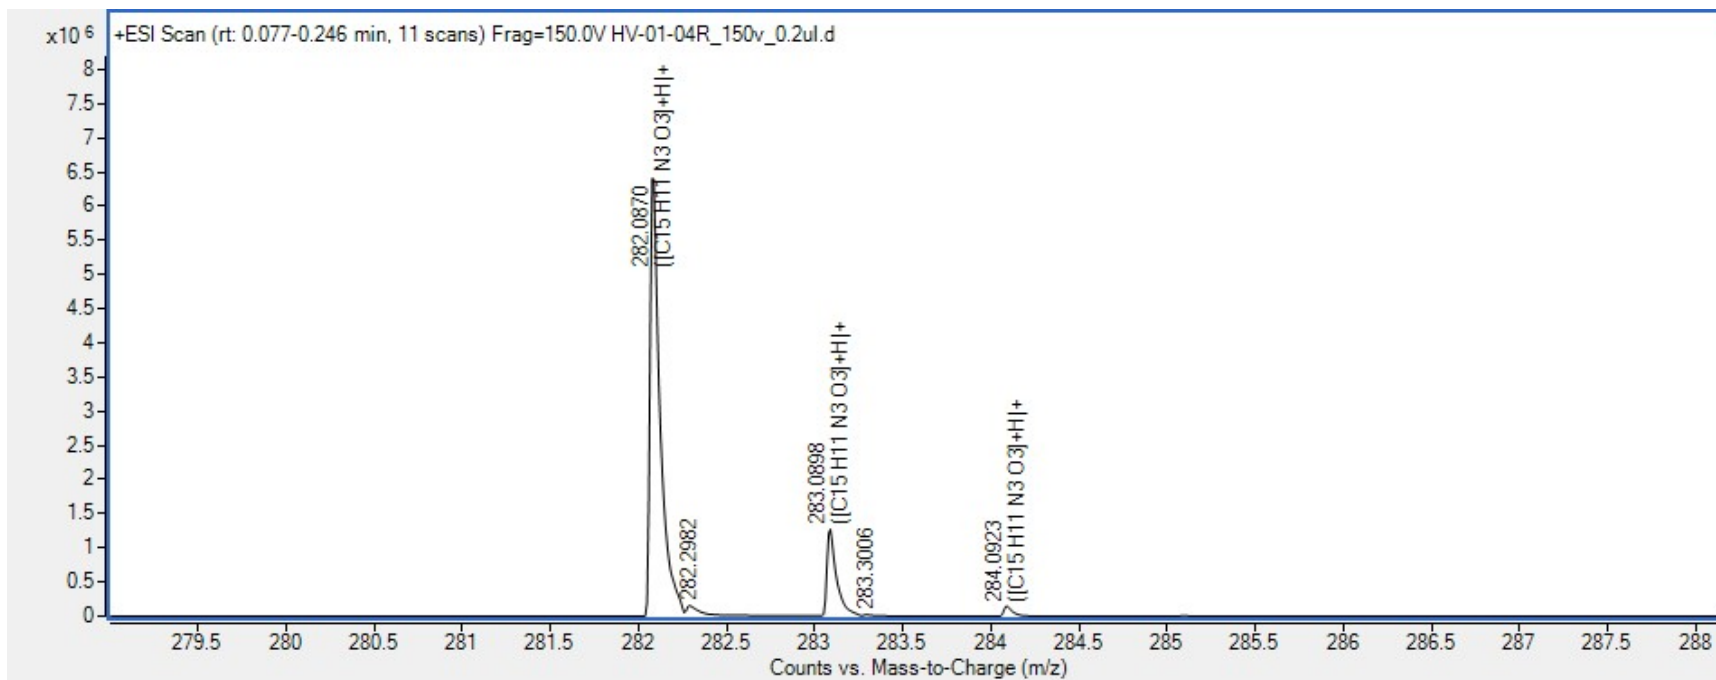

| Formula,       | Species, | m/z,      | Score, | Diff (abs. ppm), | Mass     |
|----------------|----------|-----------|--------|------------------|----------|
| C15 H11 N3 O3, | (M+H)+,  | 282.0870, | 98.66, | 1.35,            | 281.0797 |

5-(4-bromophenyl)-2-phenyl-2,4-dihydro-3H-pyrazol-3-one (P7):  $^1\text{H-NMR}$  ( $\text{CDCl}_3$ )

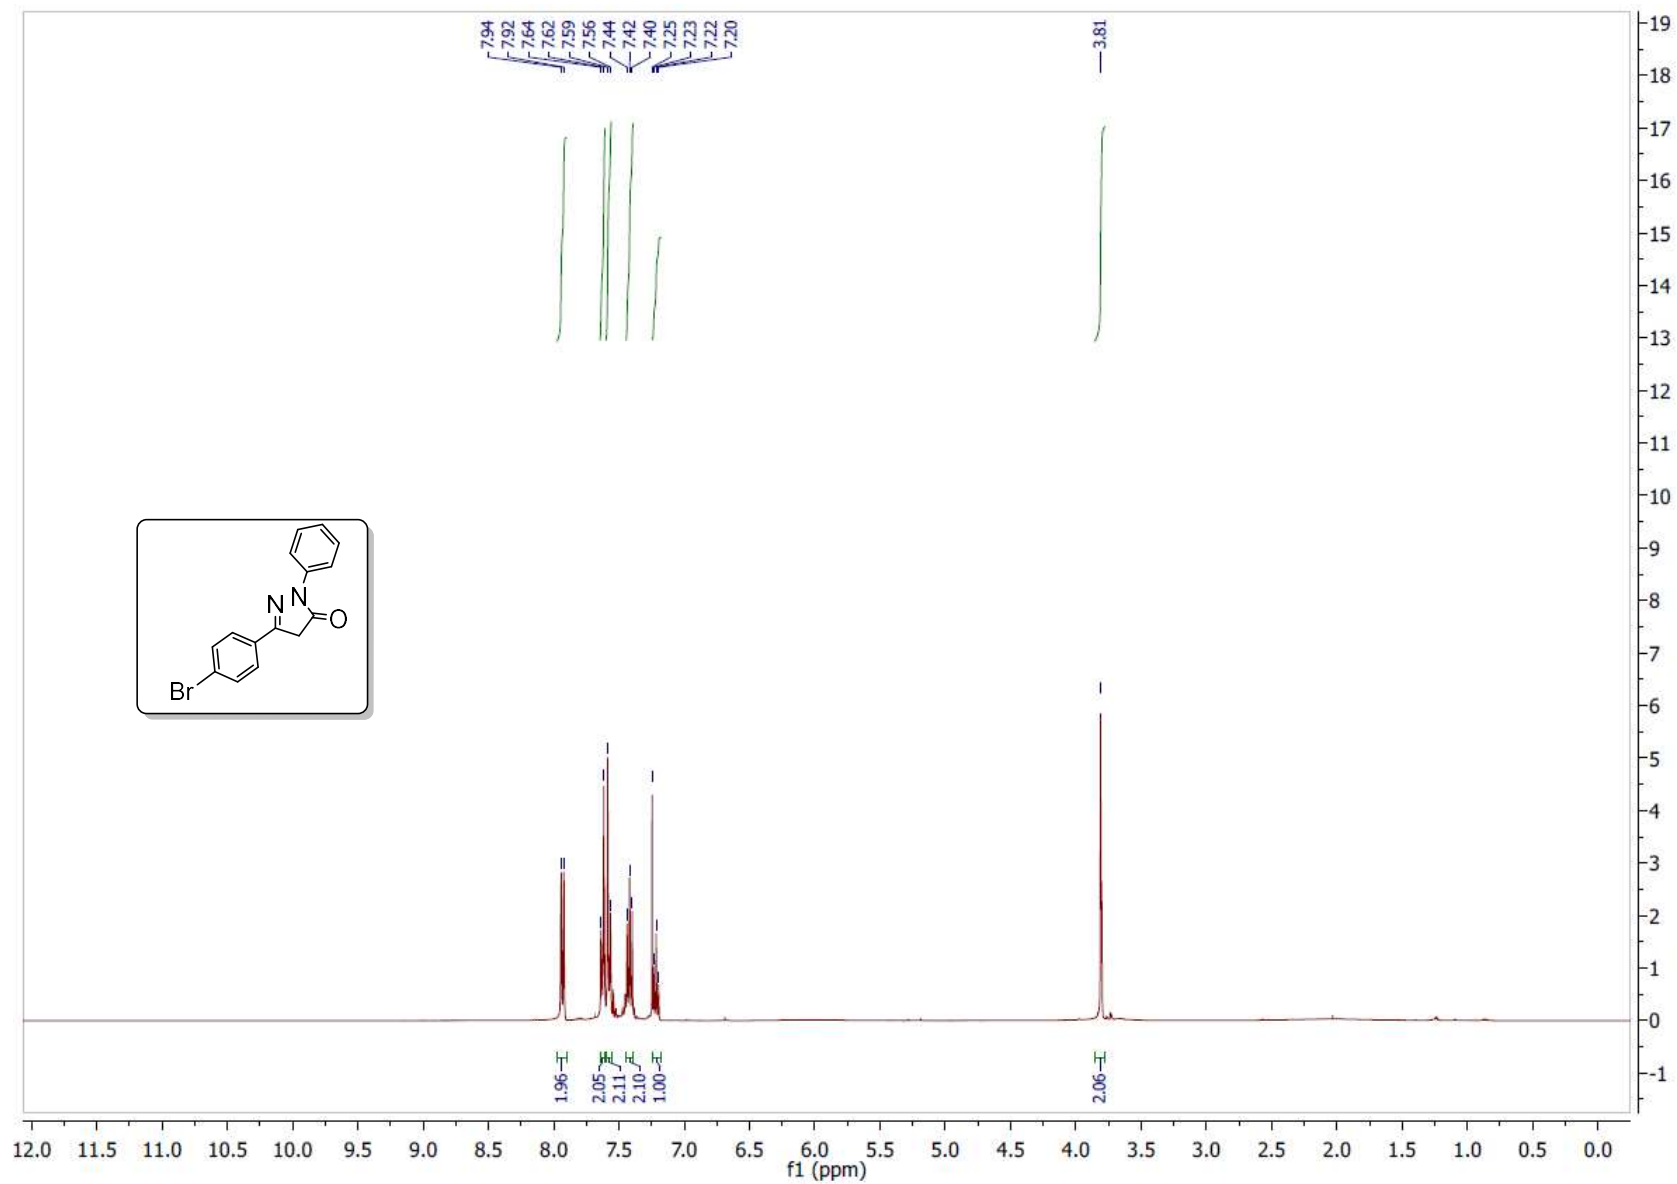

5-(4-bromophenyl)-2-phenyl-2,4-dihydro-3H-pyrazol-3-one (P7):  $^{13}\text{C}$ -NMR ( $\text{CDCl}_3$ )

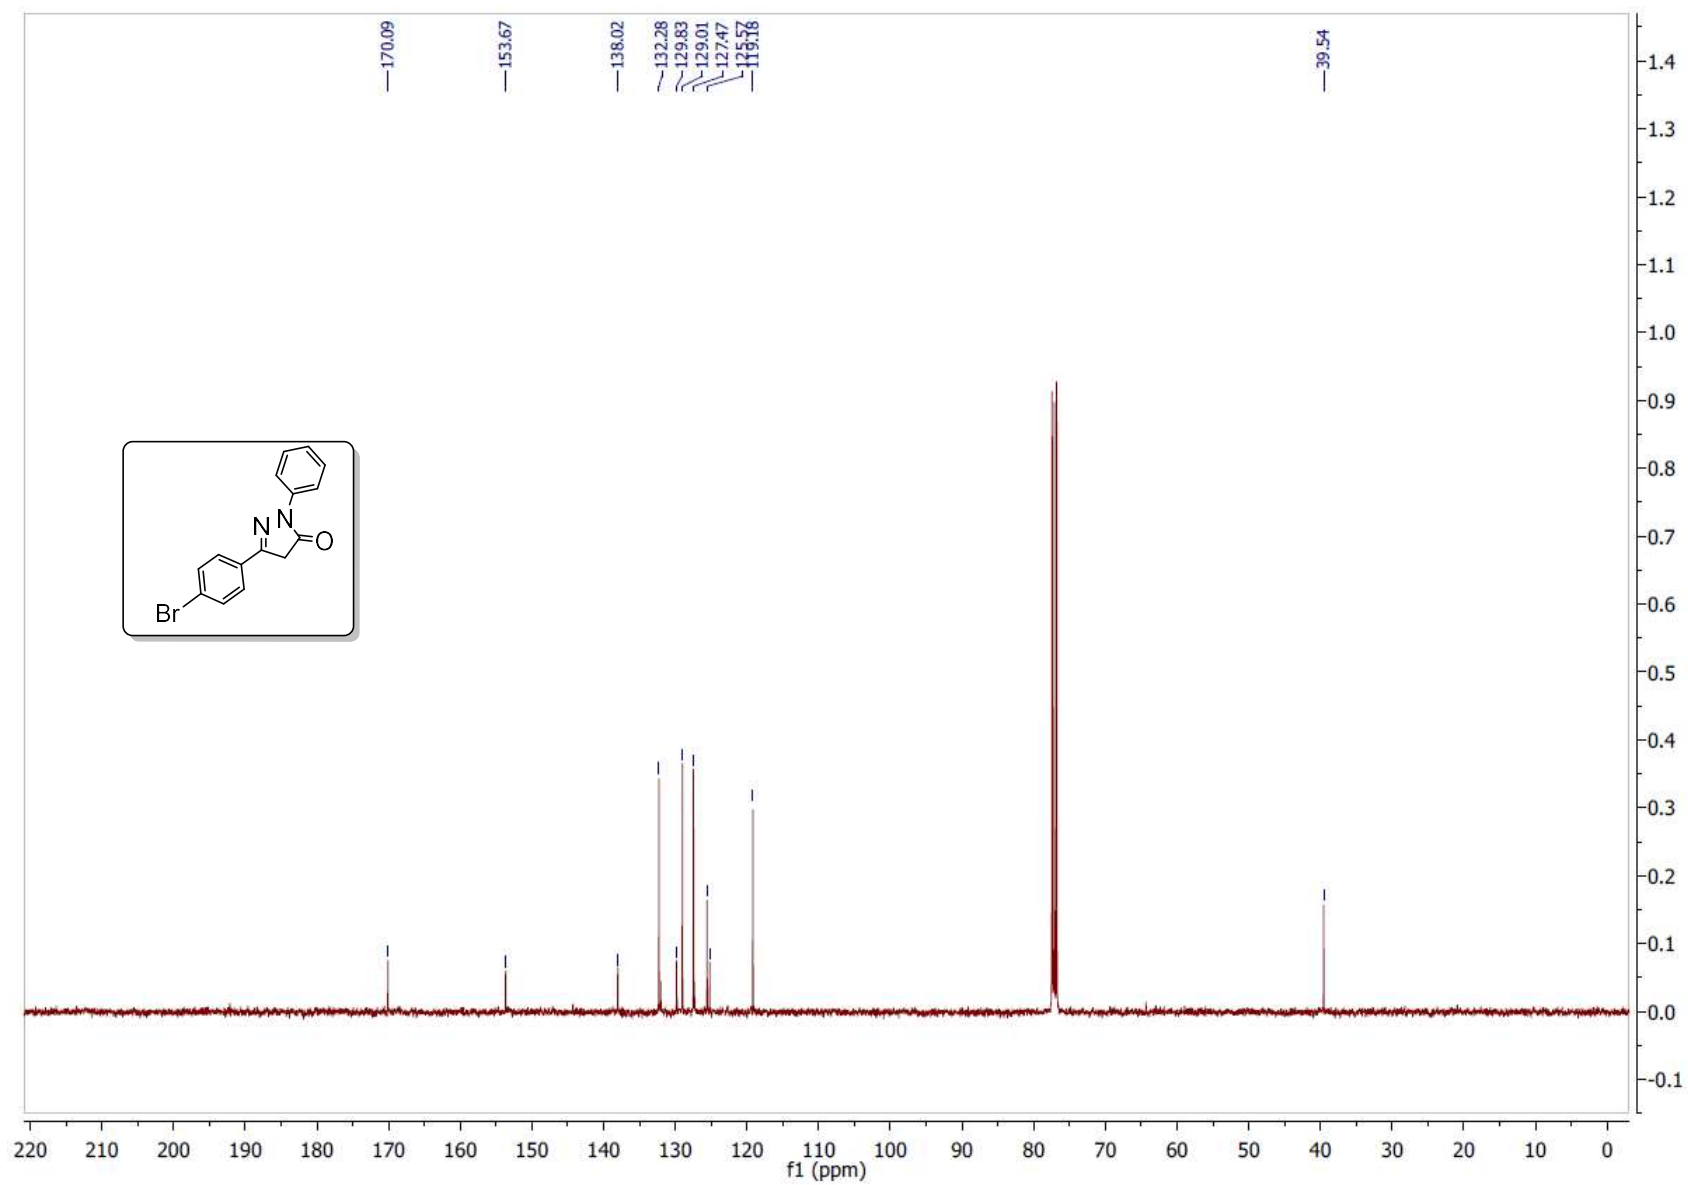

5-(4-bromophenyl)-2-phenyl-2,4-dihydro-3H-pyrazol-3-one (P7): ESI-MS

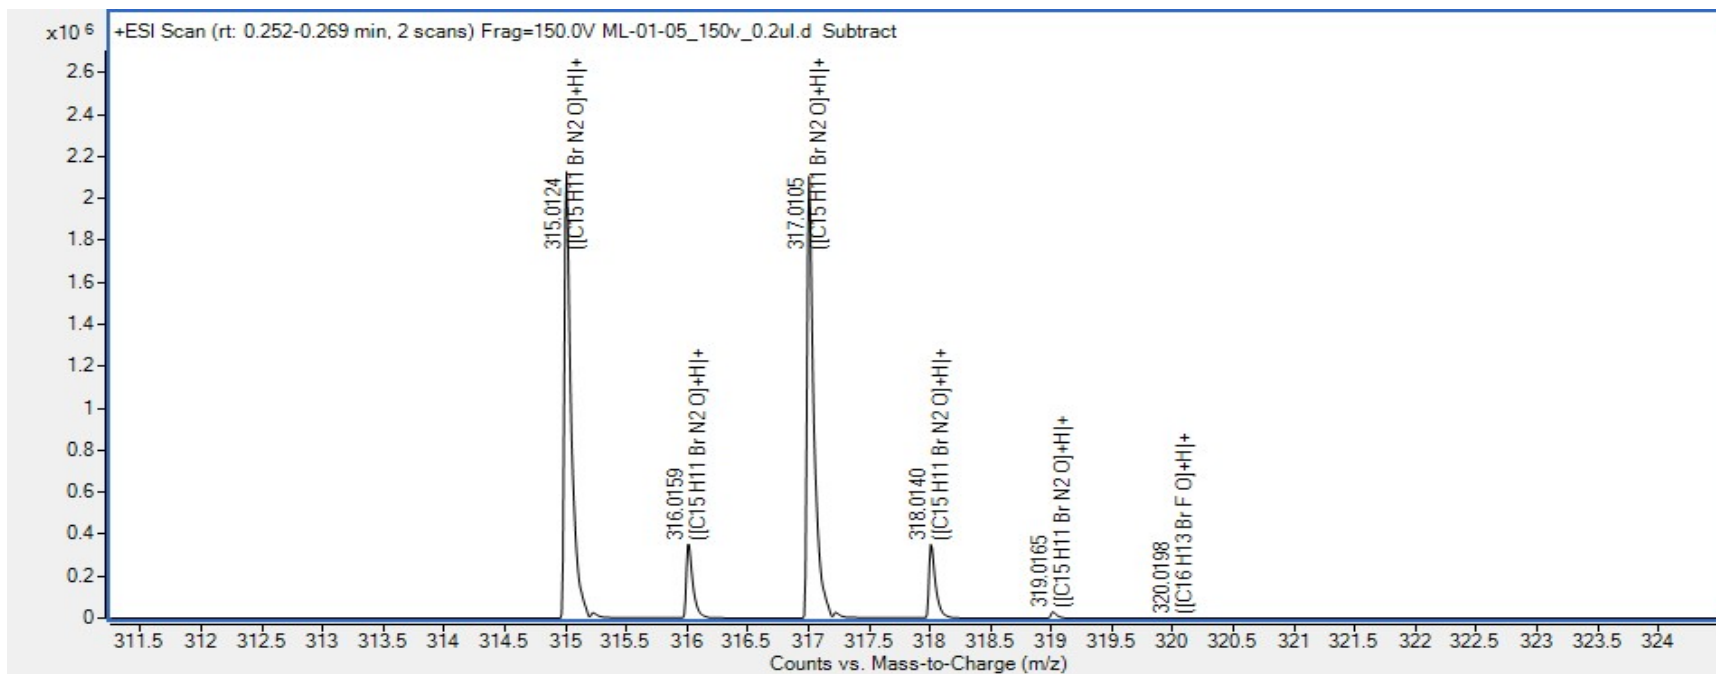

| Formula,                                             | Species,             | m/z,      | Score, | Diff (abs. ppm), | Mass     |
|------------------------------------------------------|----------------------|-----------|--------|------------------|----------|
| C <sub>15</sub> H <sub>11</sub> Br N <sub>2</sub> O, | (M+H) <sup>+</sup> , | 315.0124, | 99.41, | 0.92,            | 314.0052 |

5-(4-fluorophenyl)-2-phenyl-2,4-dihydro-3H-pyrazol-3-one (P8):  $^1\text{H-NMR}$  ( $\text{CDCl}_3$ )

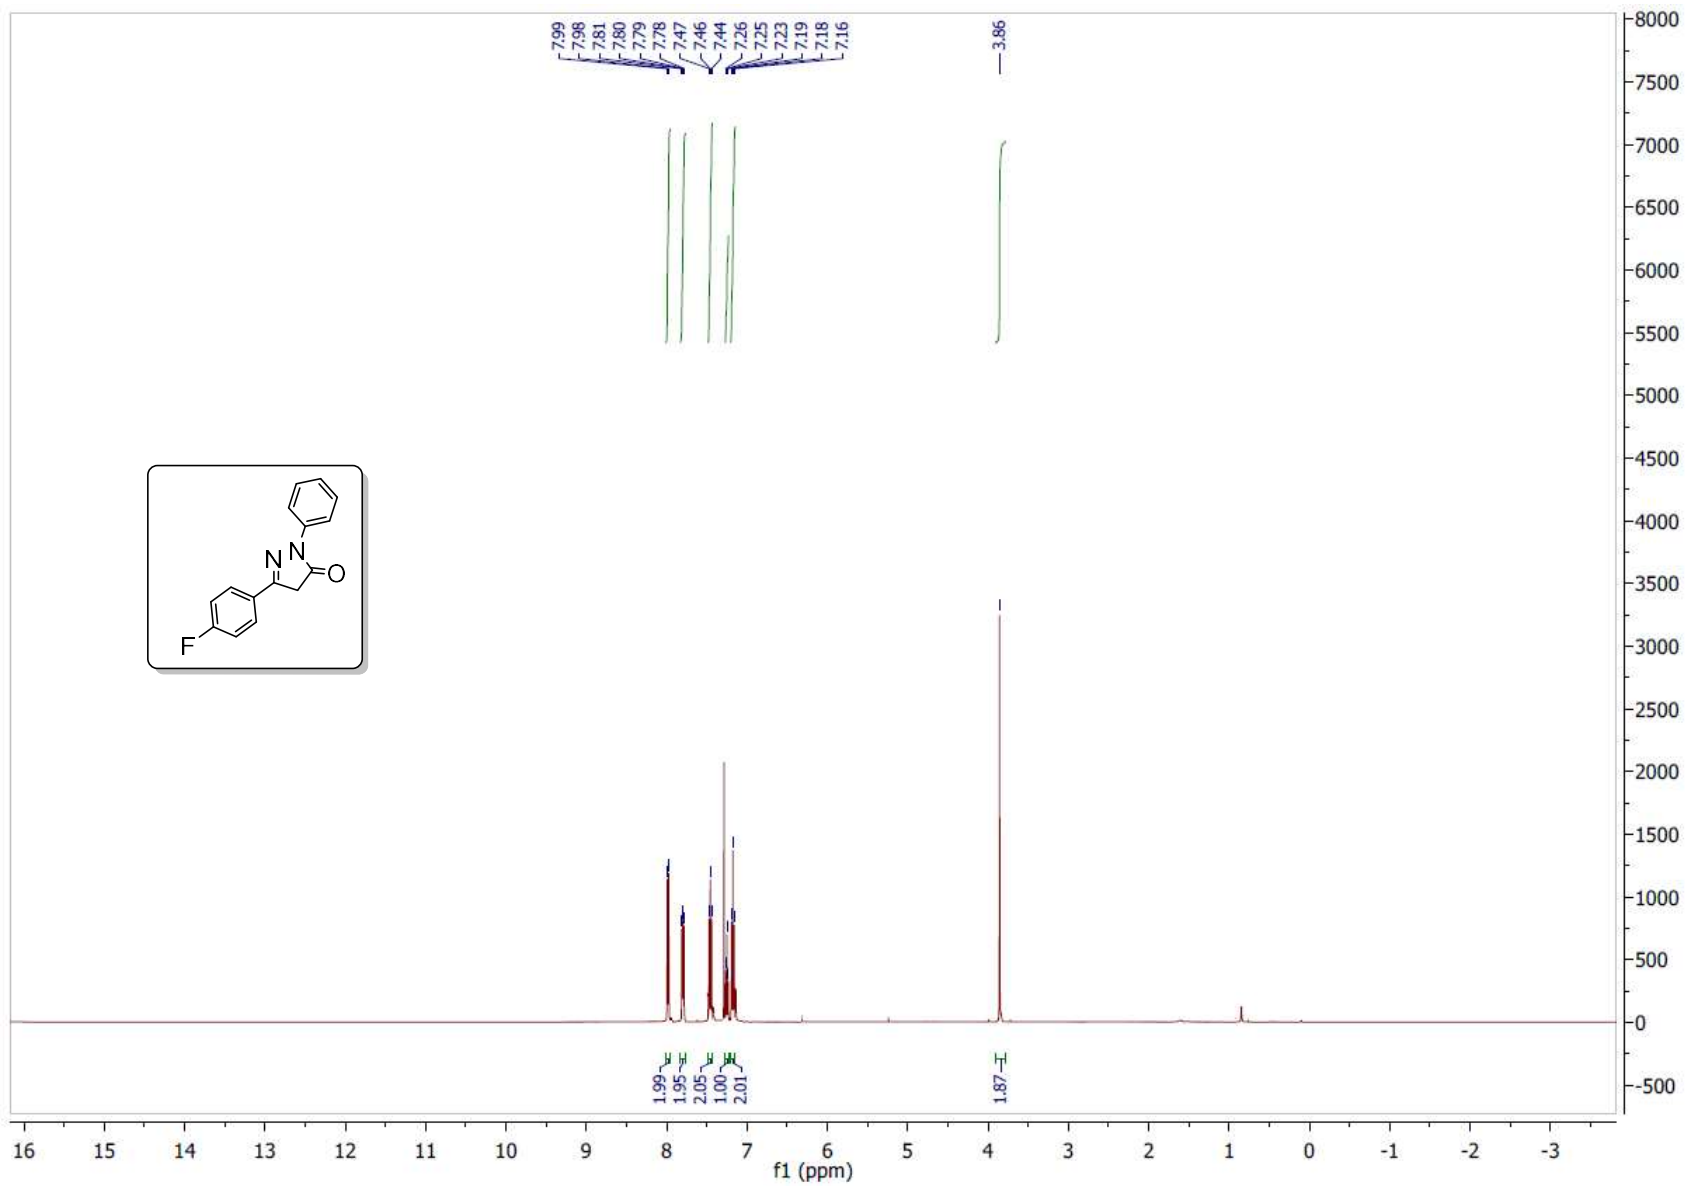

5-(4-fluorophenyl)-2-phenyl-2,4-dihydro-3H-pyrazol-3-one (P8):  $^{13}\text{C}$ -NMR ( $\text{CDCl}_3$ )

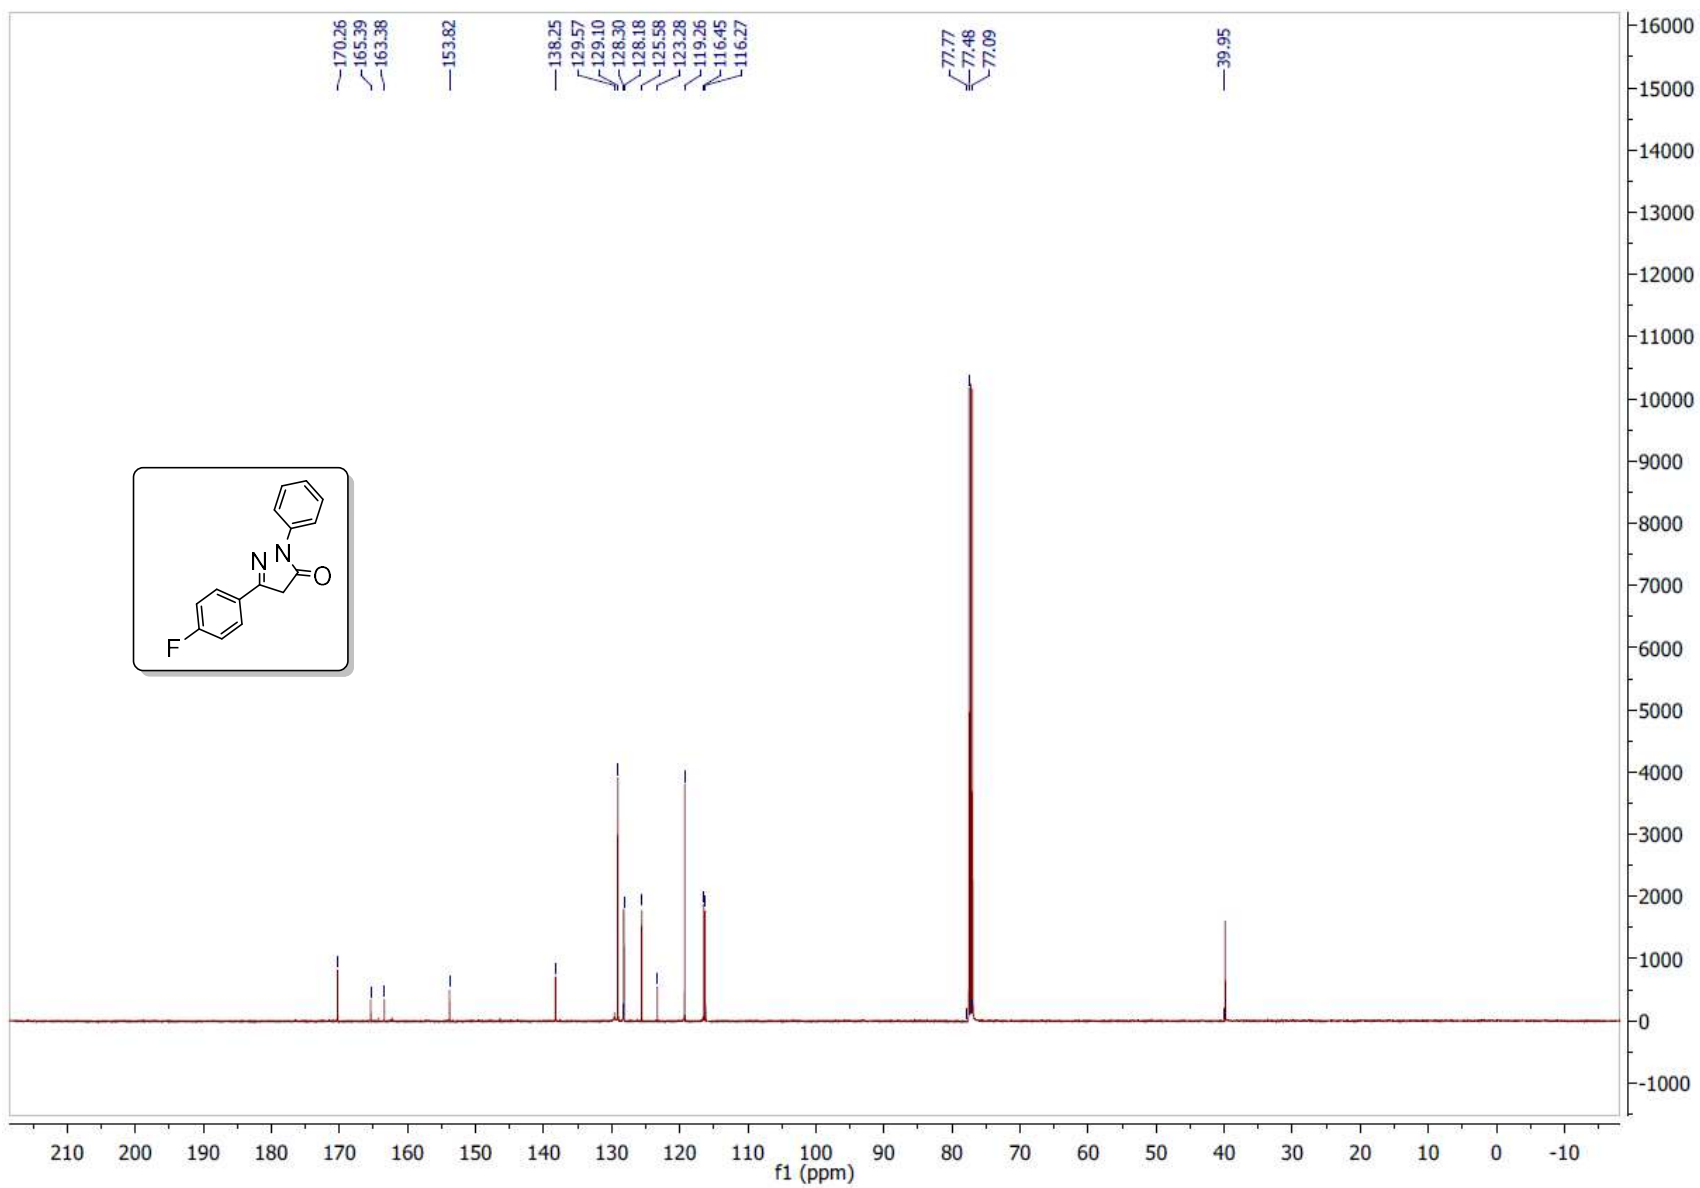

### 5-(4-fluorophenyl)-2-phenyl-2,4-dihydro-3H-pyrazol-3-one (P8): ESI-MS

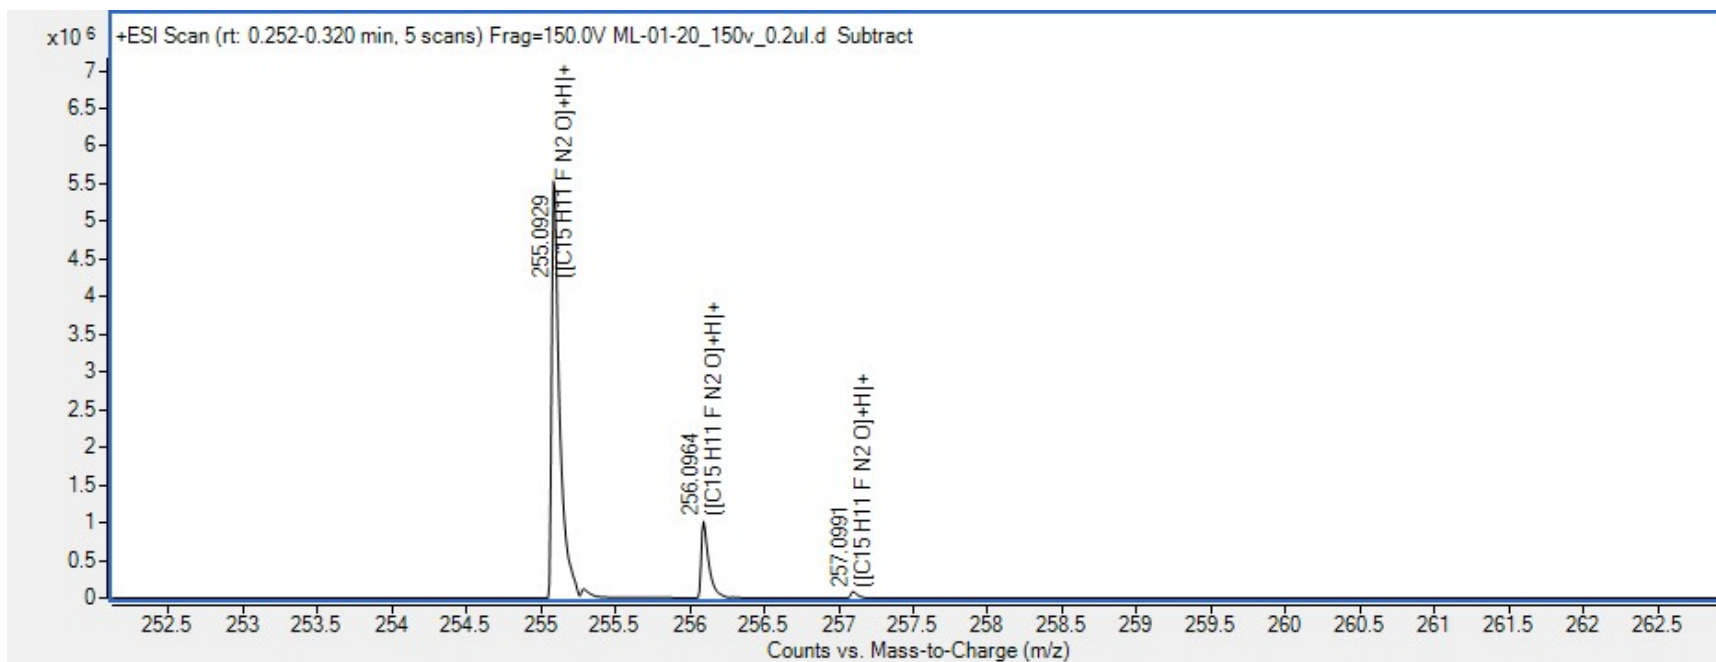

| Formula,        | Species, | m/z,      | Score, | Diff (abs. ppm), | Mass     |
|-----------------|----------|-----------|--------|------------------|----------|
| C15 H11 F N2 O, | (M+H)+,  | 255.0929, | 99.45, | 0.75,            | 254.0857 |

5-(4-methoxyphenyl)-2-phenyl-2,4-dihydro-3H-pyrazol-3-one (P9): <sup>1</sup>H-NMR (CDCl<sub>3</sub>)

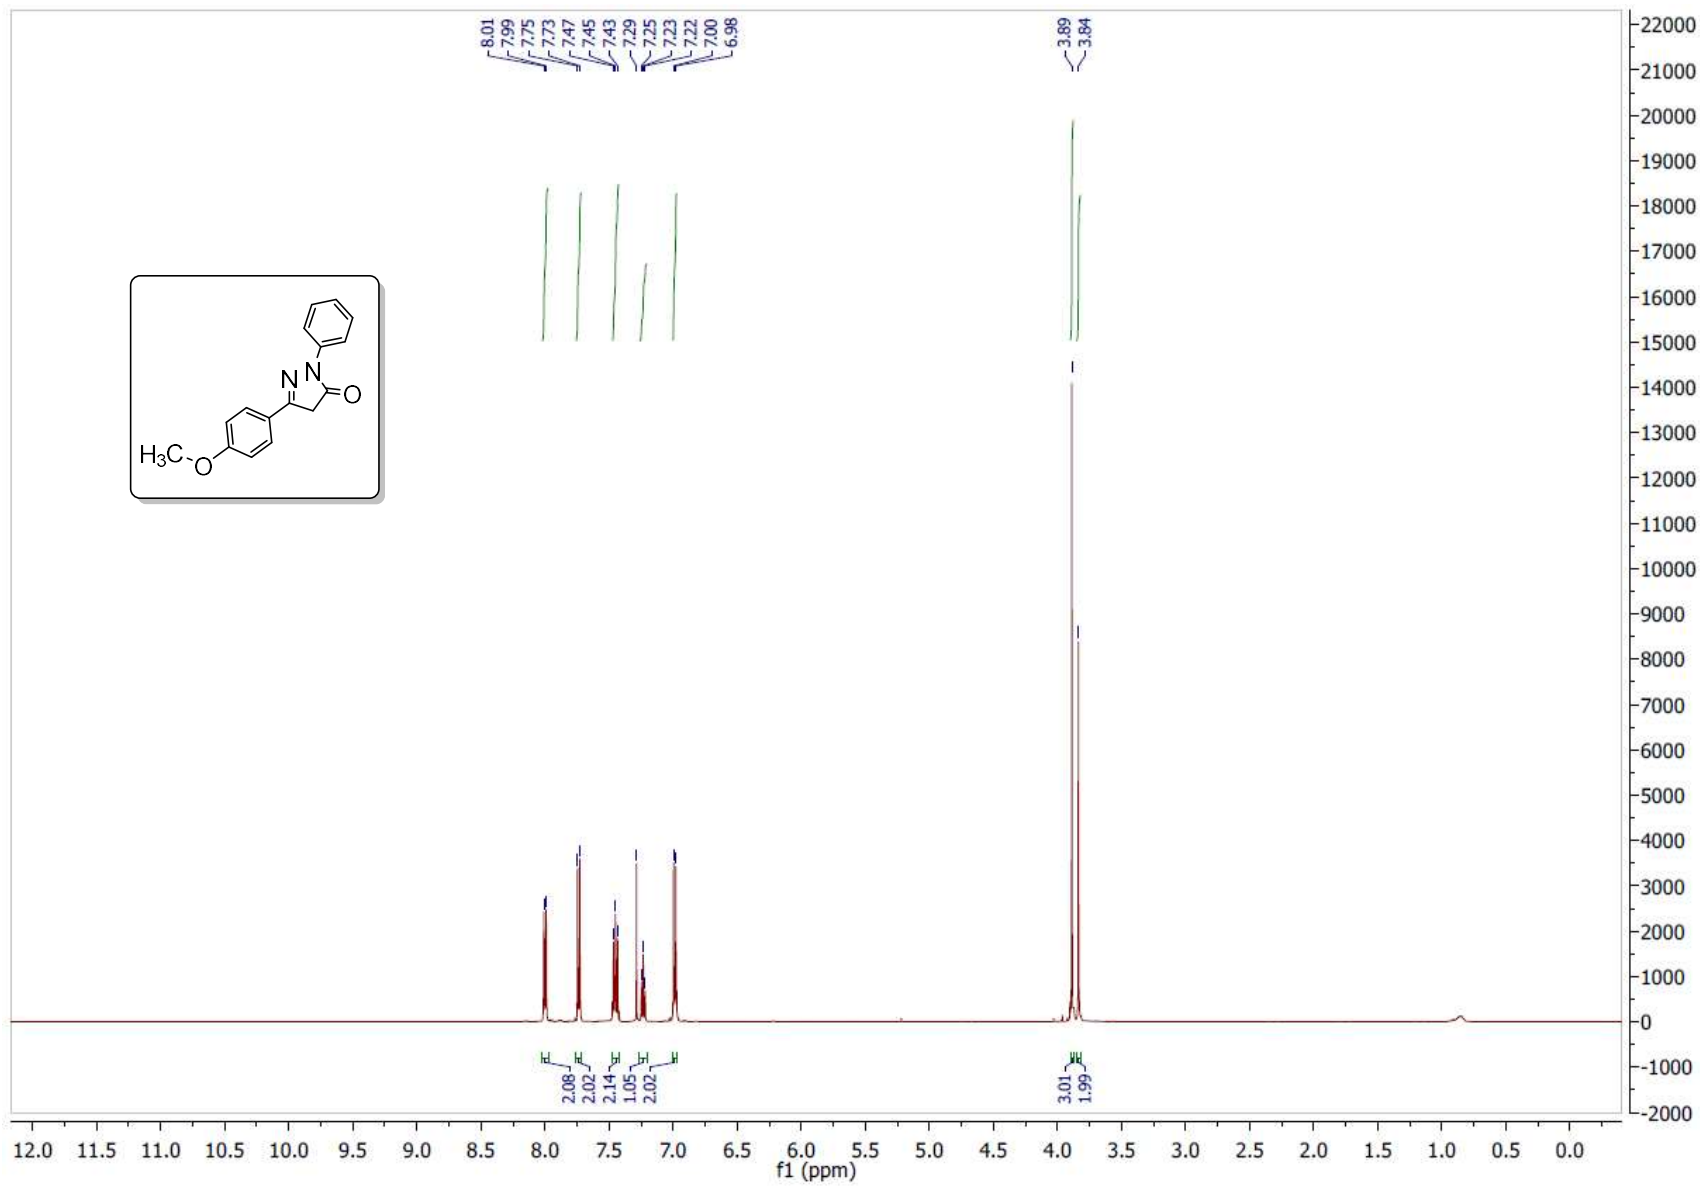



5-(4-methoxyphenyl)-2-phenyl-2,4-dihydro-3H-pyrazol-3-one (P9):  $^{13}\text{C}$ -NMR ( $\text{CDCl}_3$ )

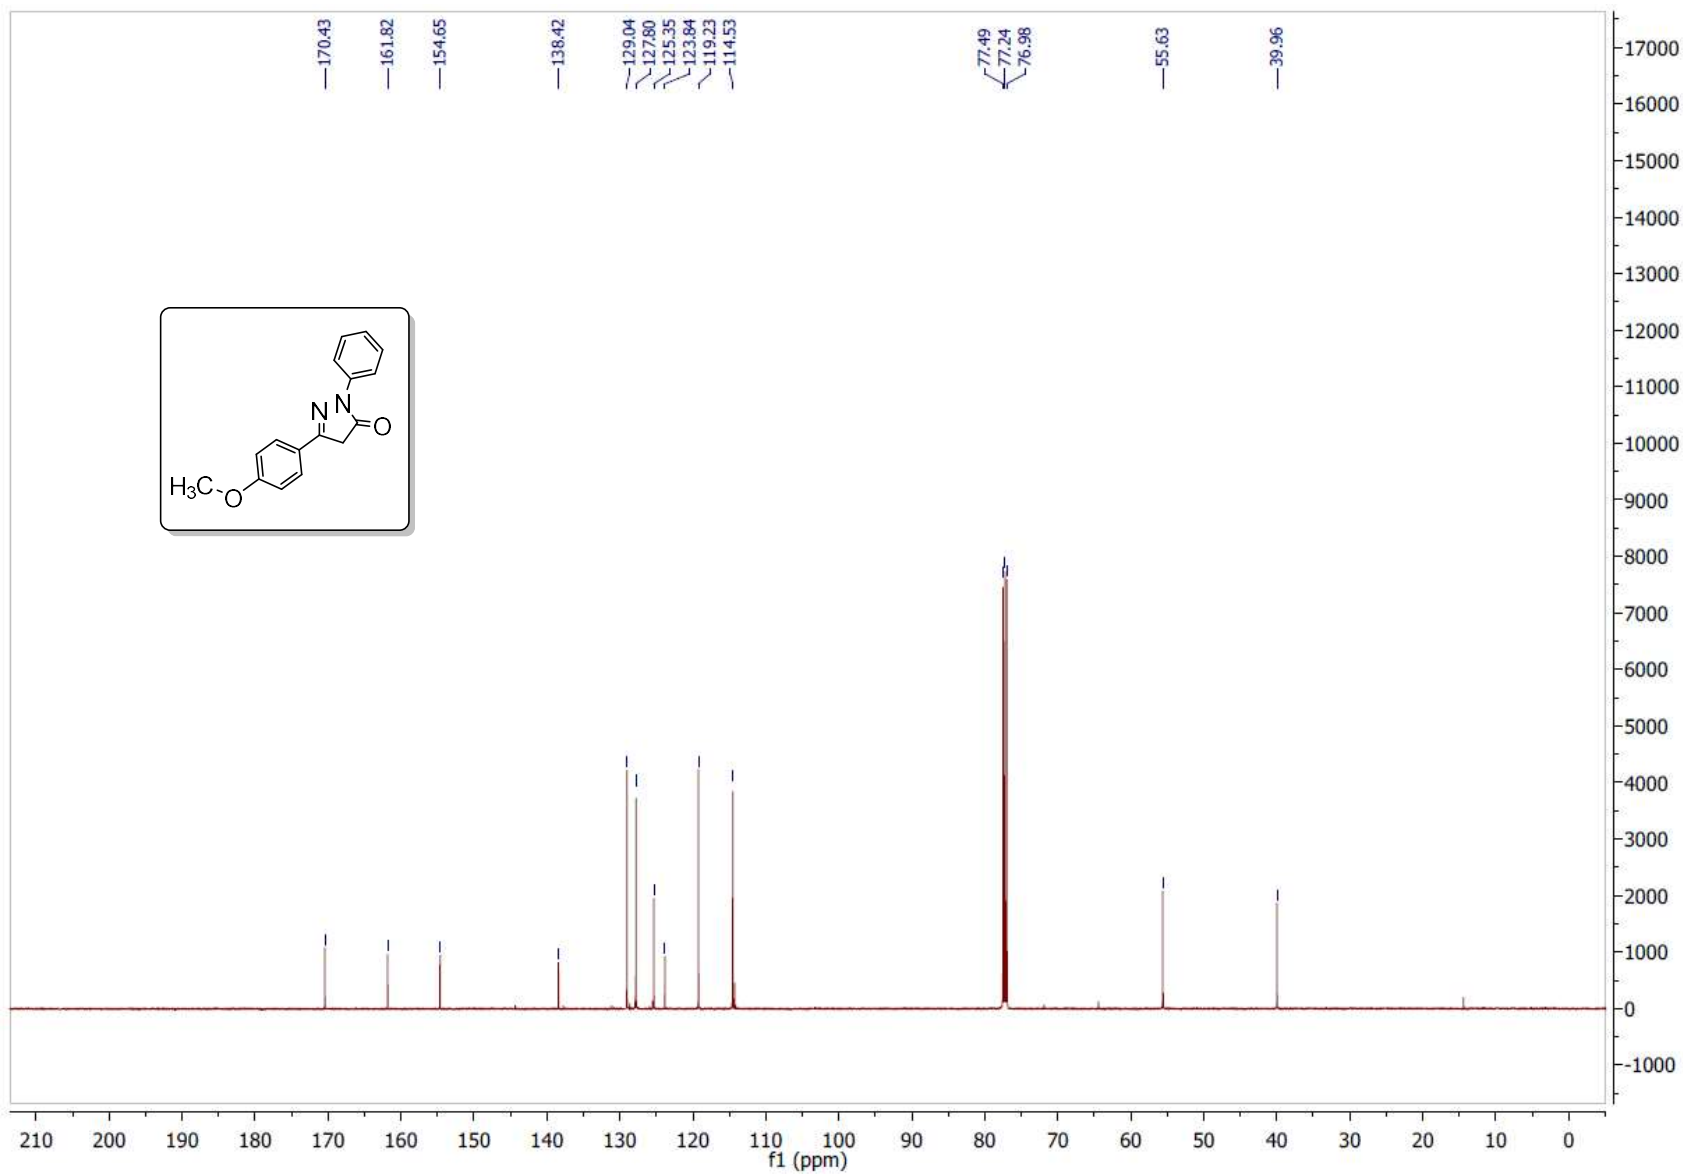

### 5-(4-methoxyphenyl)-2-phenyl-2,4-dihydro-3H-pyrazol-3-one (P9): ESI-MS

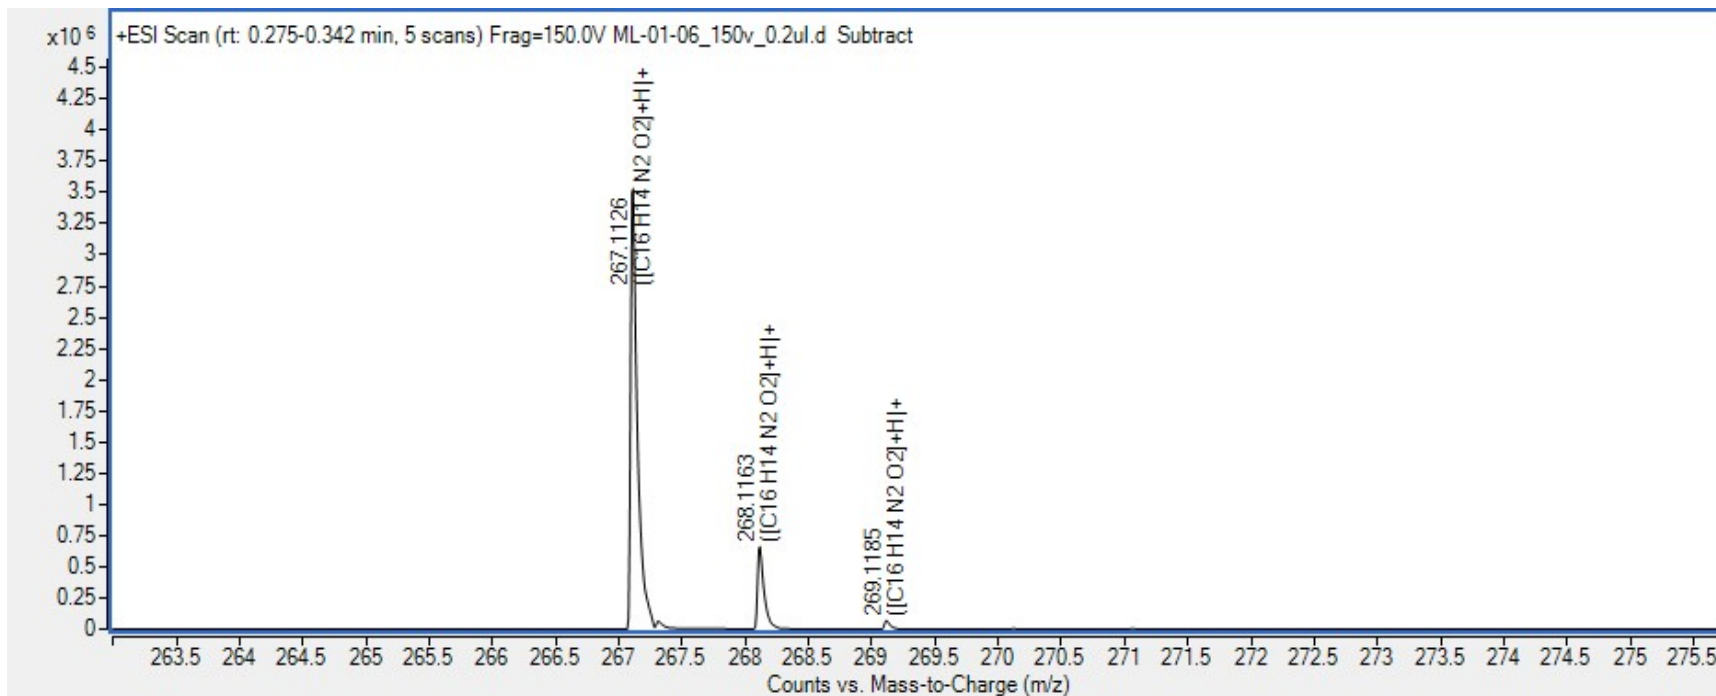

| Formula       | Species | m/z      | Score | Diff (abs. ppm) | Mass     |
|---------------|---------|----------|-------|-----------------|----------|
| C16 H14 N2 O2 | (M+H)+  | 267.1126 | 99.44 | 0.39            | 266.1054 |

5-(3-methoxyphenyl)-2-phenyl-2,4-dihydro-3H-pyrazol-3-one (P10): <sup>1</sup>H-NMR (CDCl<sub>3</sub>)

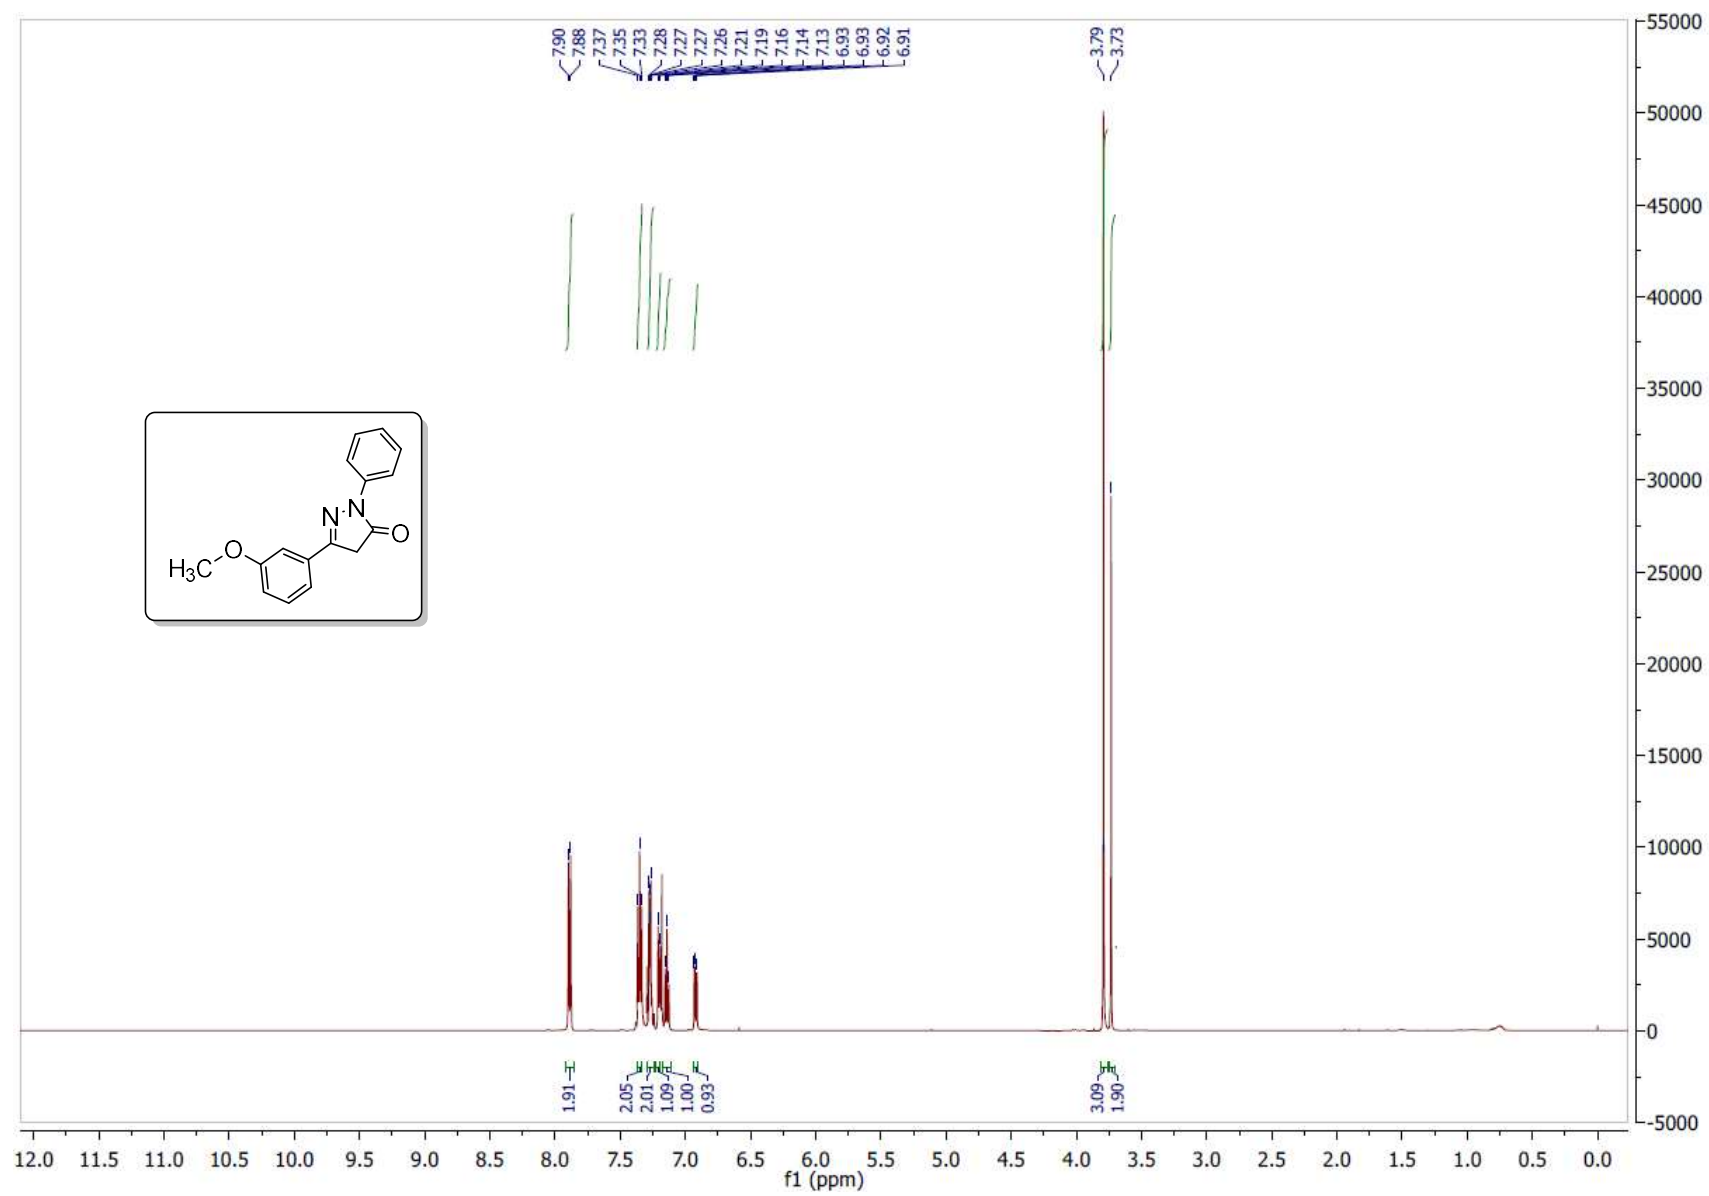

5-(3-methoxyphenyl)-2-phenyl-2,4-dihydro-3H-pyrazol-3-one (P10):  $^{13}\text{C}$ -NMR ( $\text{CDCl}_3$ )

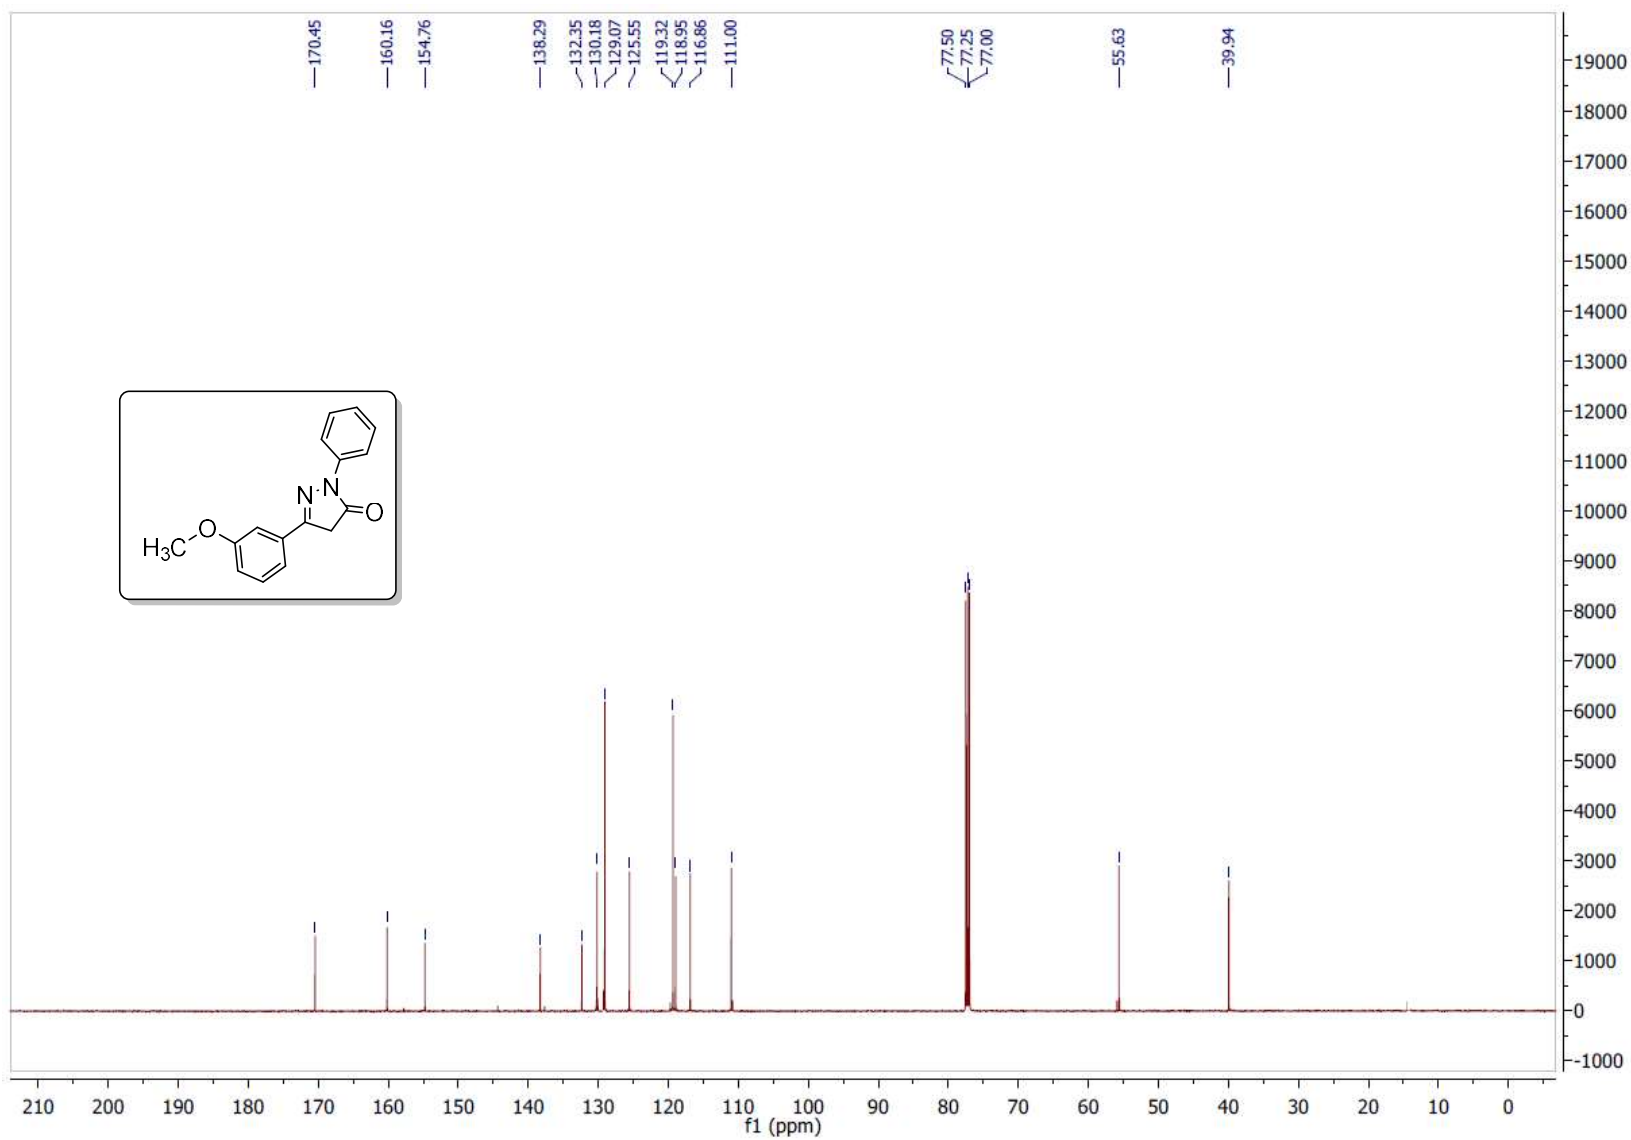

### 5-(3-methoxyphenyl)-2-phenyl-2,4-dihydro-3H-pyrazol-3-one (P10): ESI-MS

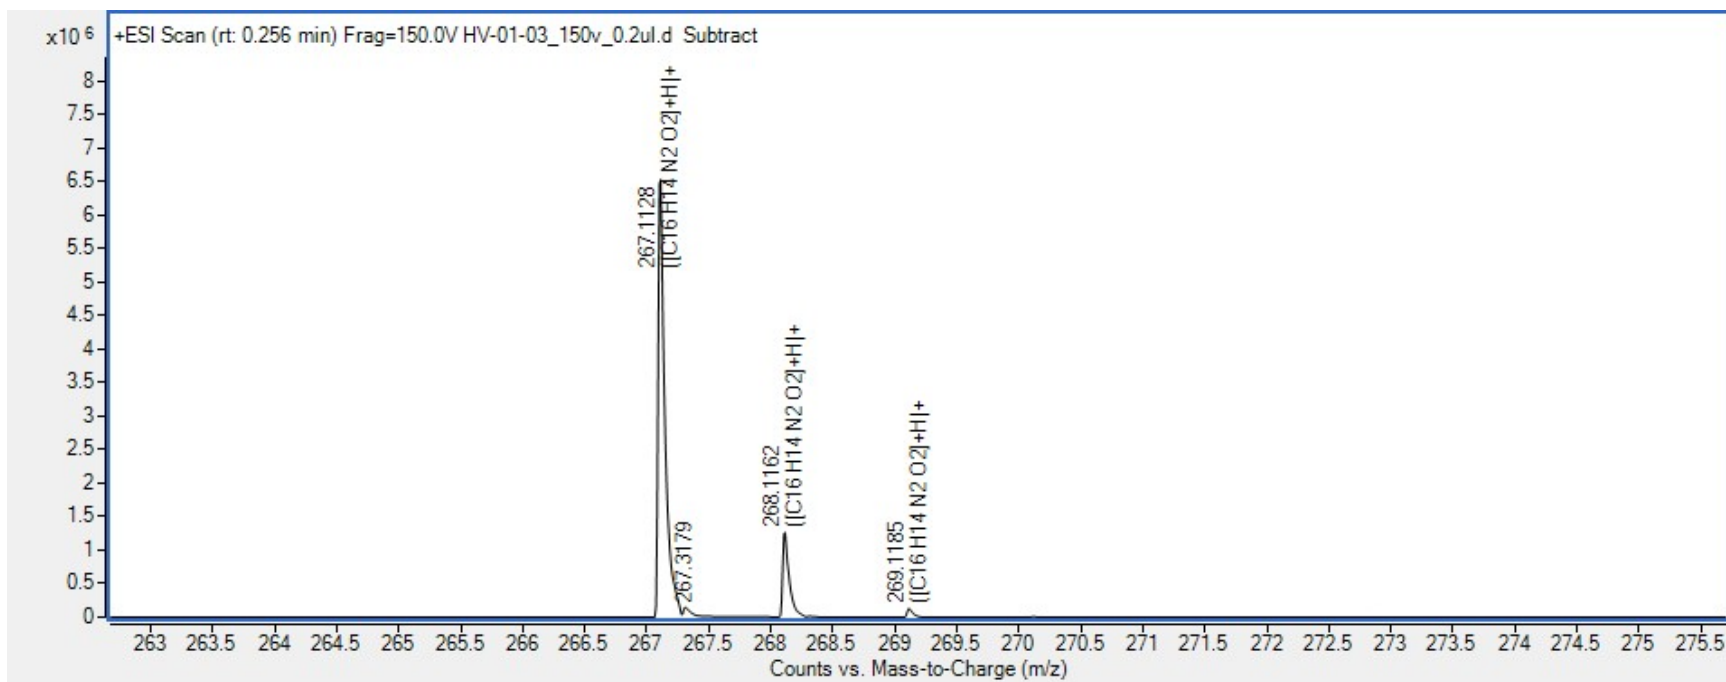

| Formula,       | Species, | m/z,      | Score, | Diff (abs. ppm), | Mass     |
|----------------|----------|-----------|--------|------------------|----------|
| C16 H14 N2 O2, | (M+H)+,  | 267.1128, | 99.59, | 0.16,            | 266.1056 |

2-phenyl-5-(4-(trifluoromethyl)phenyl)-2,4-dihydro-3H-pyrazol-3-one (P11):  $^1\text{H-NMR}$  ( $\text{CDCl}_3$ )

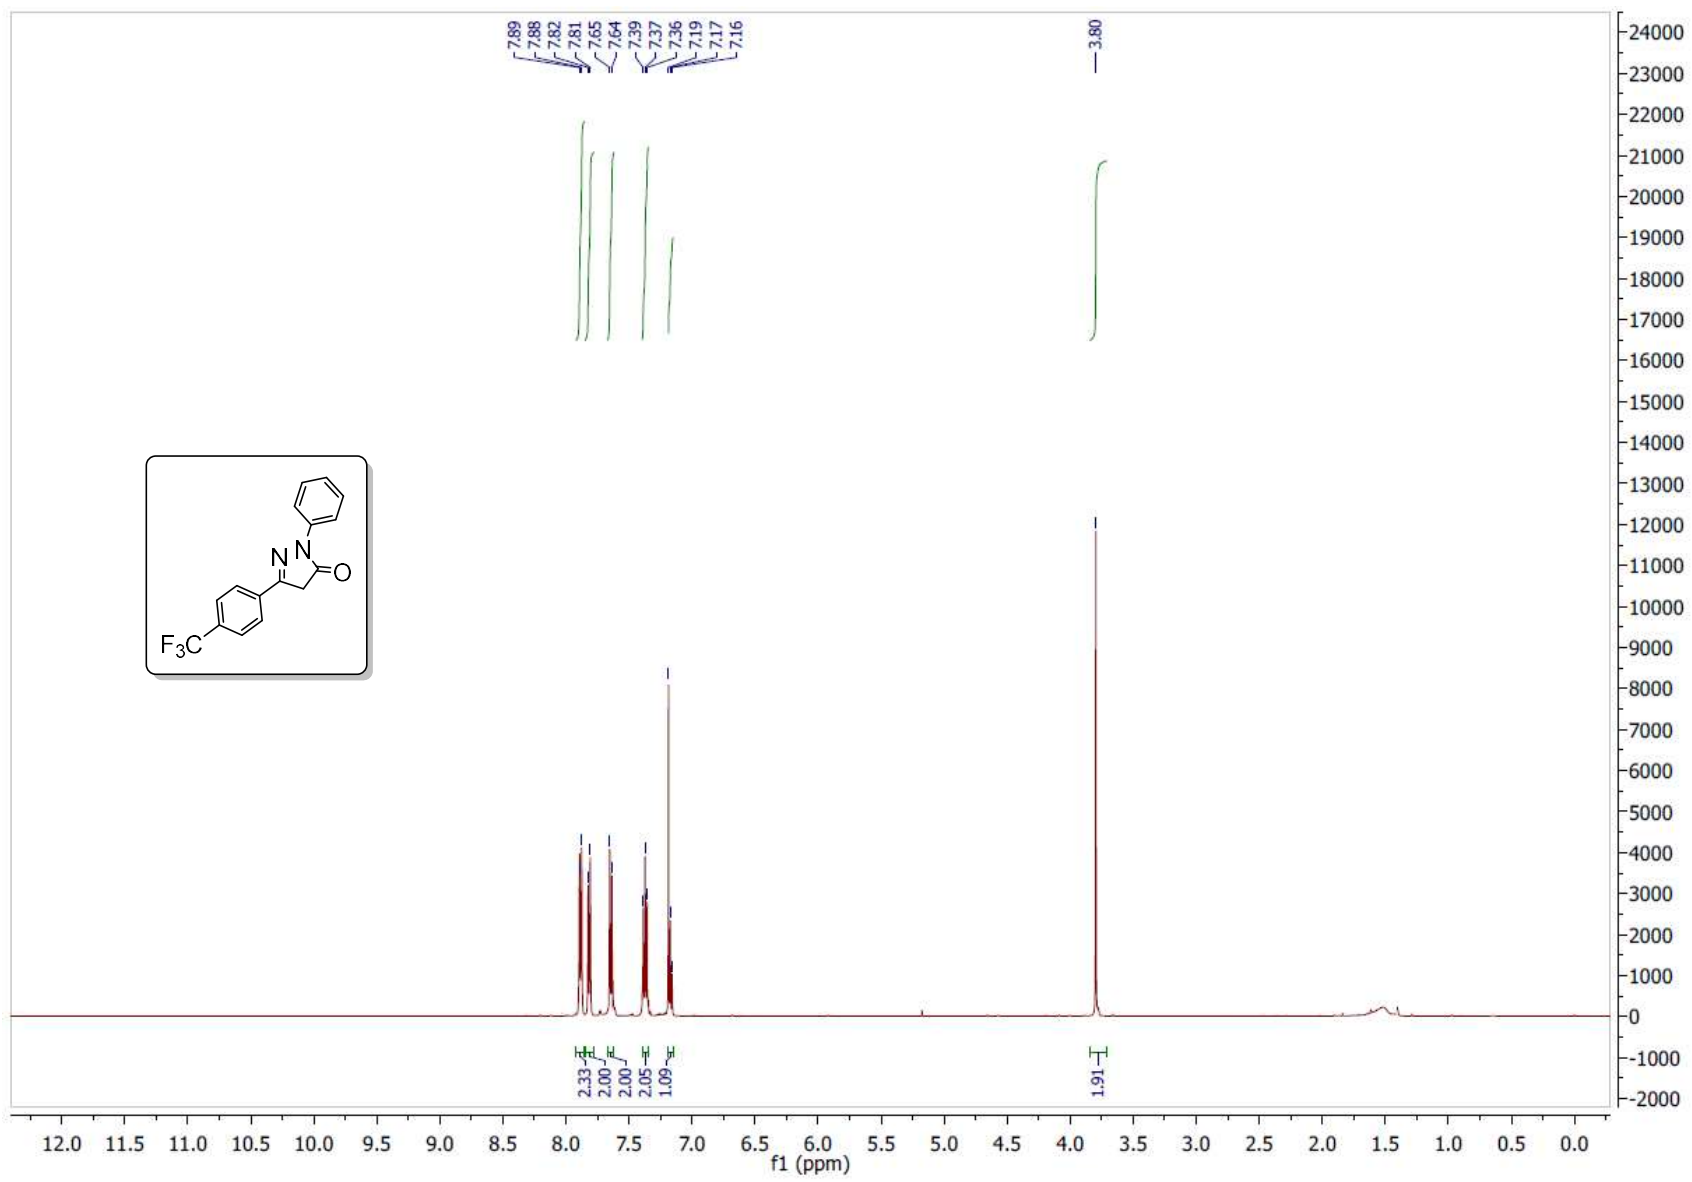

2-phenyl-5-(4-(trifluoromethyl)phenyl)-2,4-dihydro-3H-pyrazol-3-one (P11):  $^{13}\text{C}$ -NMR ( $\text{CDCl}_3$ )

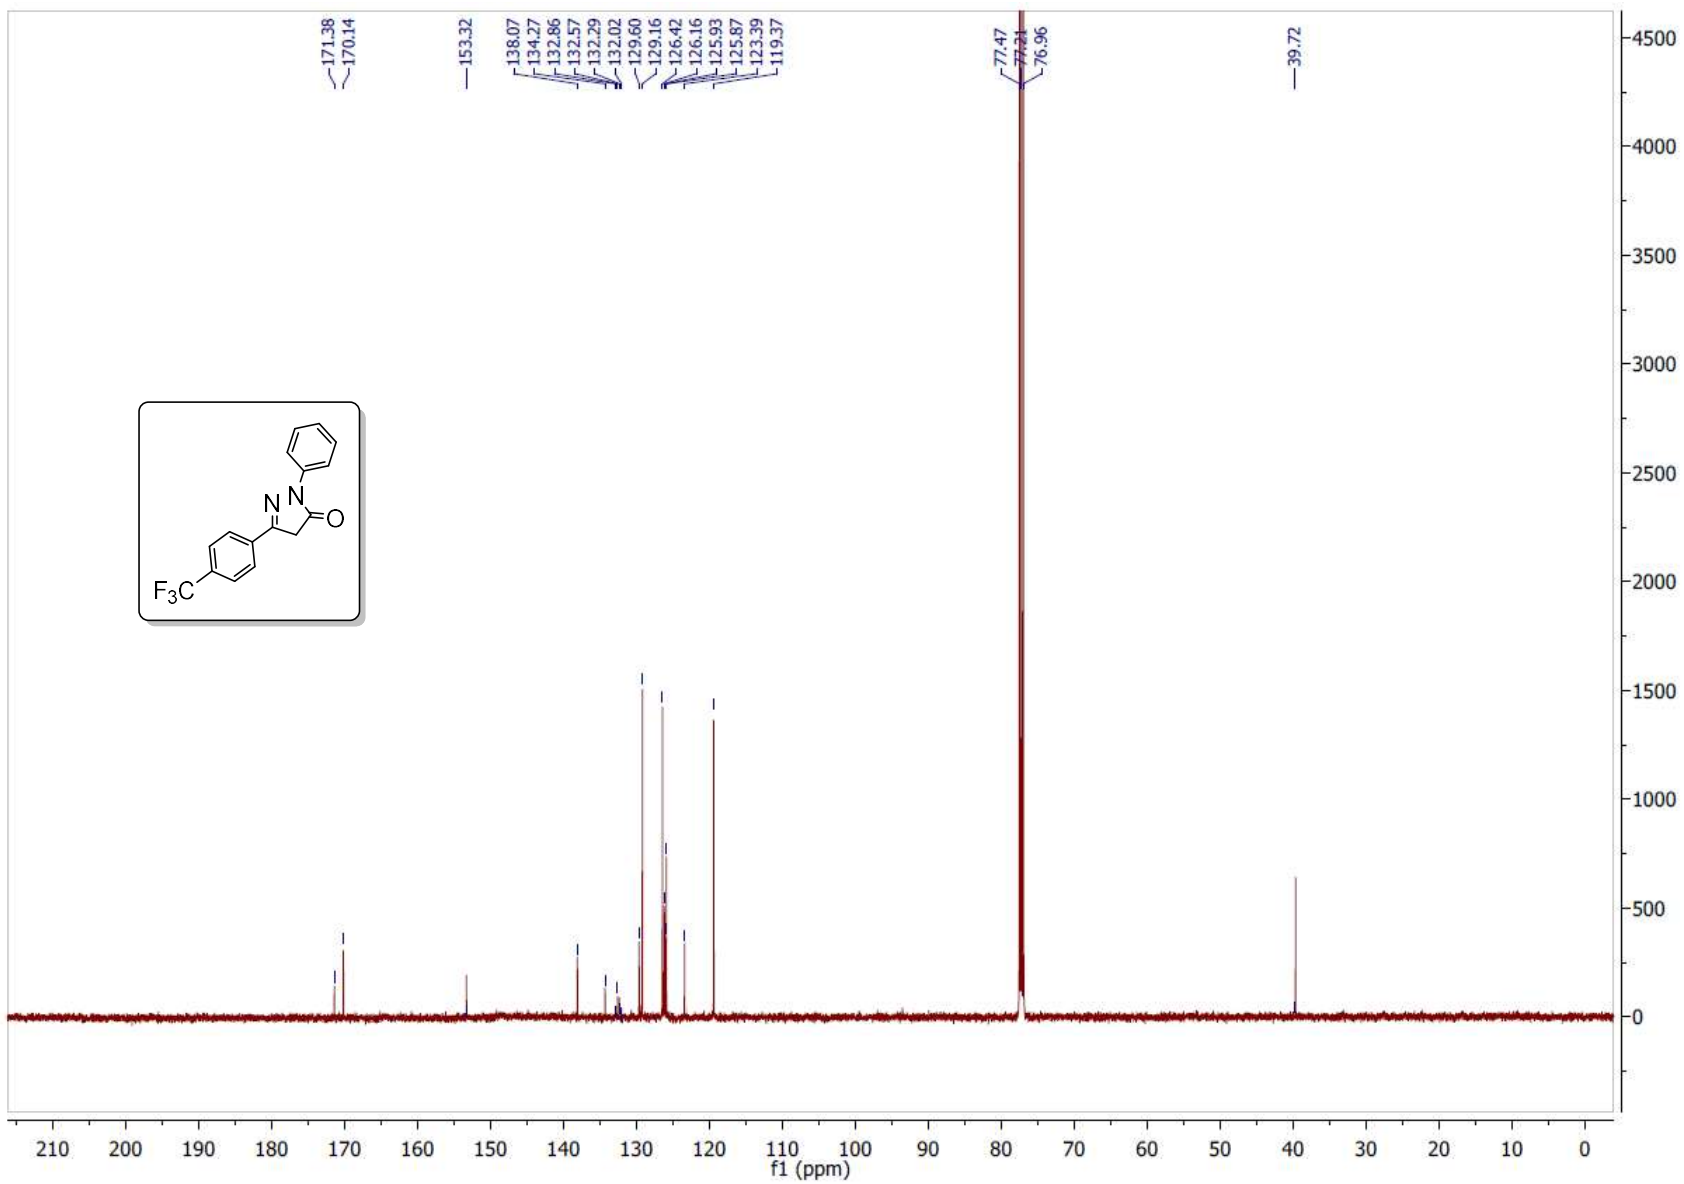

## 2-phenyl-5-(4-(trifluoromethyl)phenyl)-2,4-dihydro-3H-pyrazol-3-one (P11): ESI-MS

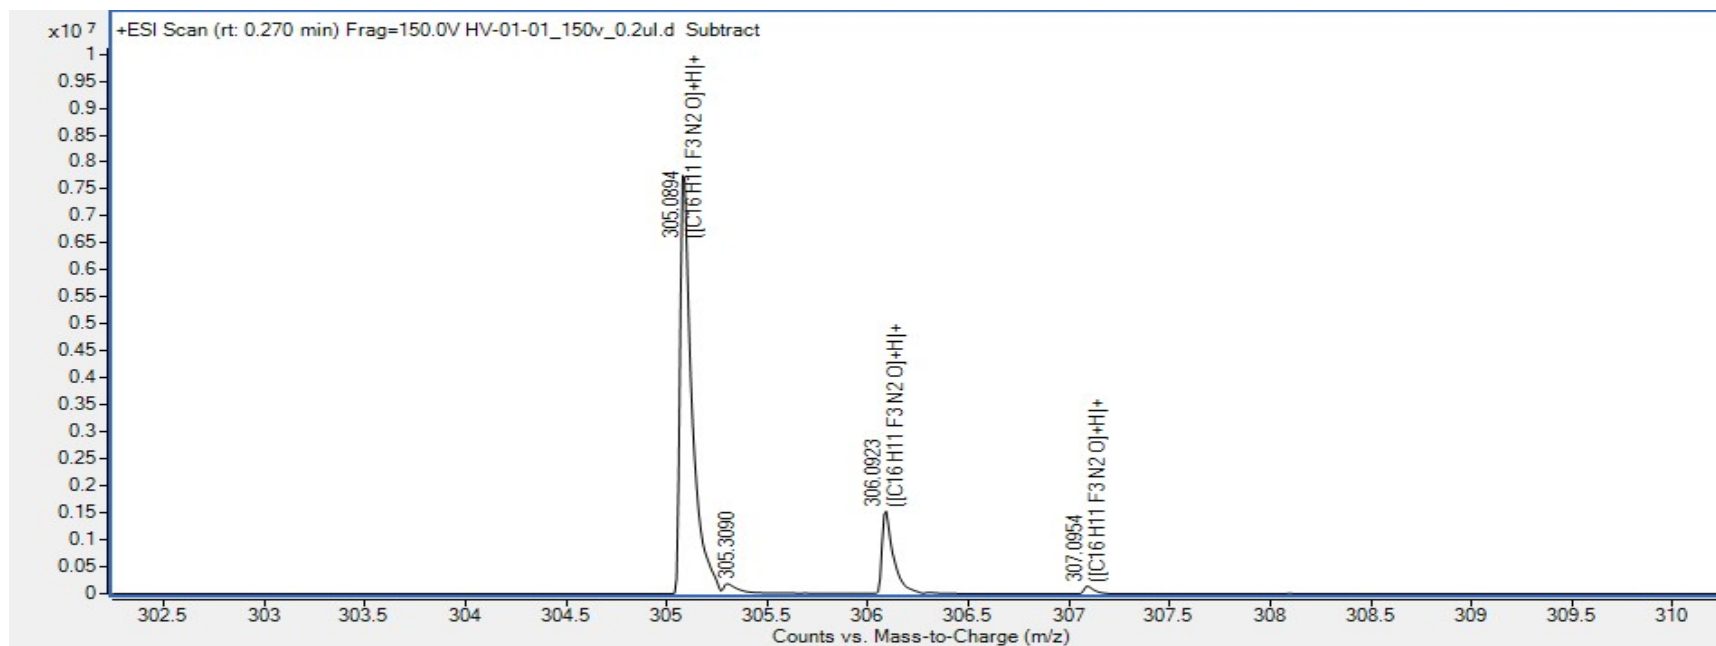

| Formula,         | Species, | m/z,      | Score, | Diff (abs. ppm), | Mass     |
|------------------|----------|-----------|--------|------------------|----------|
| C16 H11 F3 N2 O, | (M+H)+,  | 305.0894, | 99.34, | 0.98,            | 304.0821 |



2-phenyl-5-(2,3,4,5-tetrafluorophenyl)-2,4-dihydro-3H-pyrazol-3-one (P12):  $^1\text{H-NMR}$  ( $\text{CDCl}_3$ )

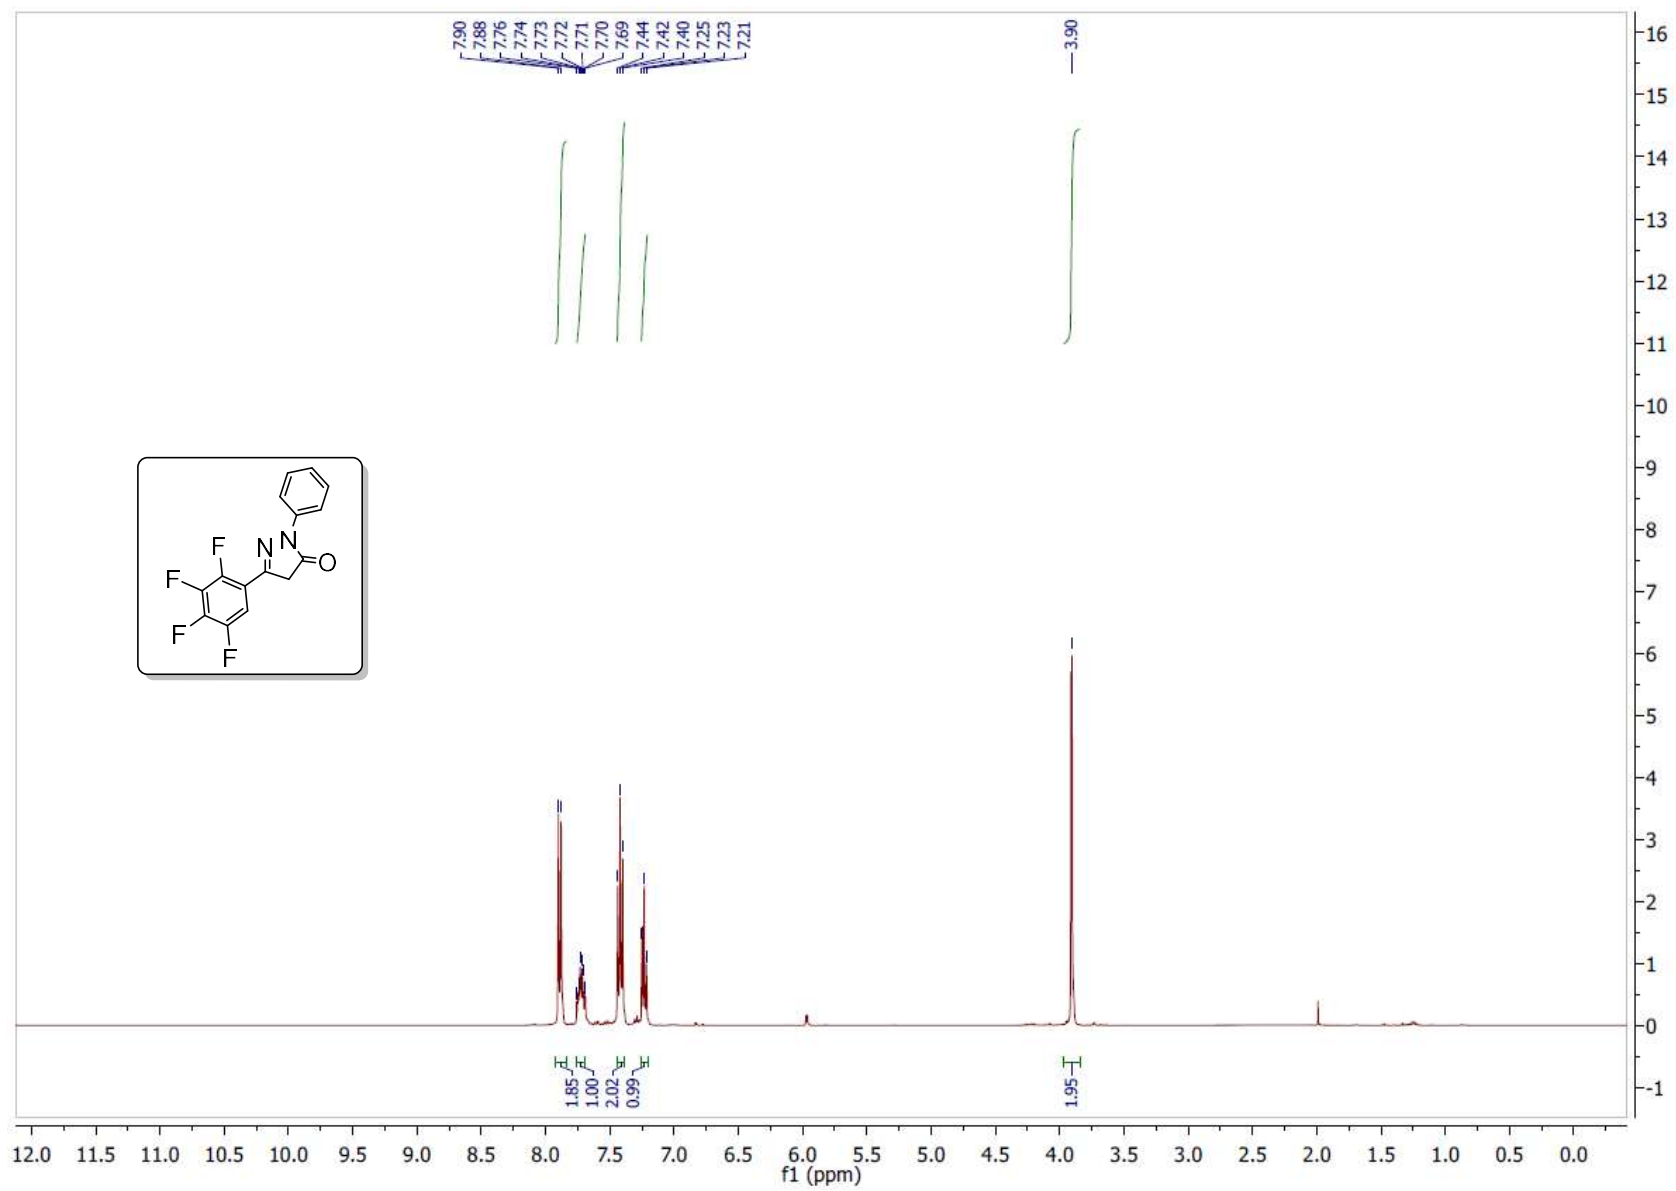

2-phenyl-5-(2,3,4,5-tetrafluorophenyl)-2,4-dihydro-3H-pyrazol-3-one (P12):  $^{13}\text{C}$ -NMR ( $\text{CDCl}_3$ )

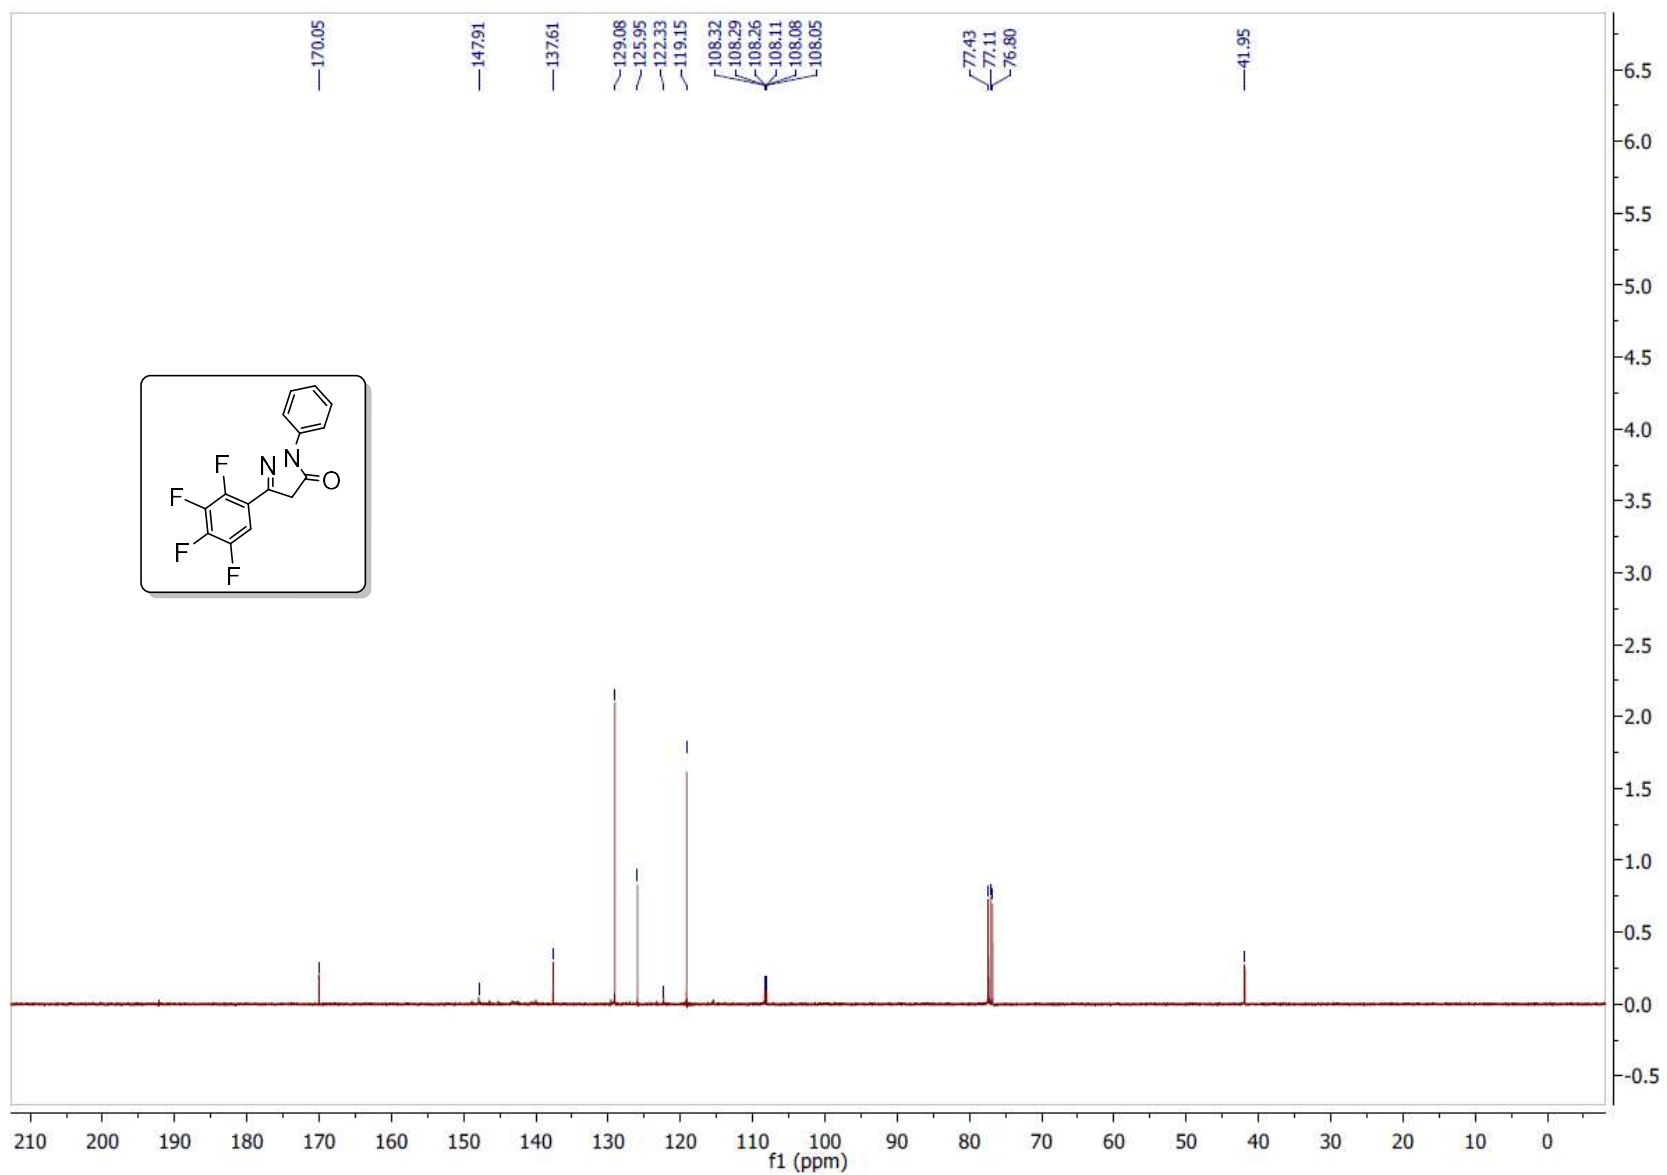

## 2-phenyl-5-(2,3,4,5-tetrafluorophenyl)-2,4-dihydro-3H-pyrazol-3-one (P12): ESI-MS

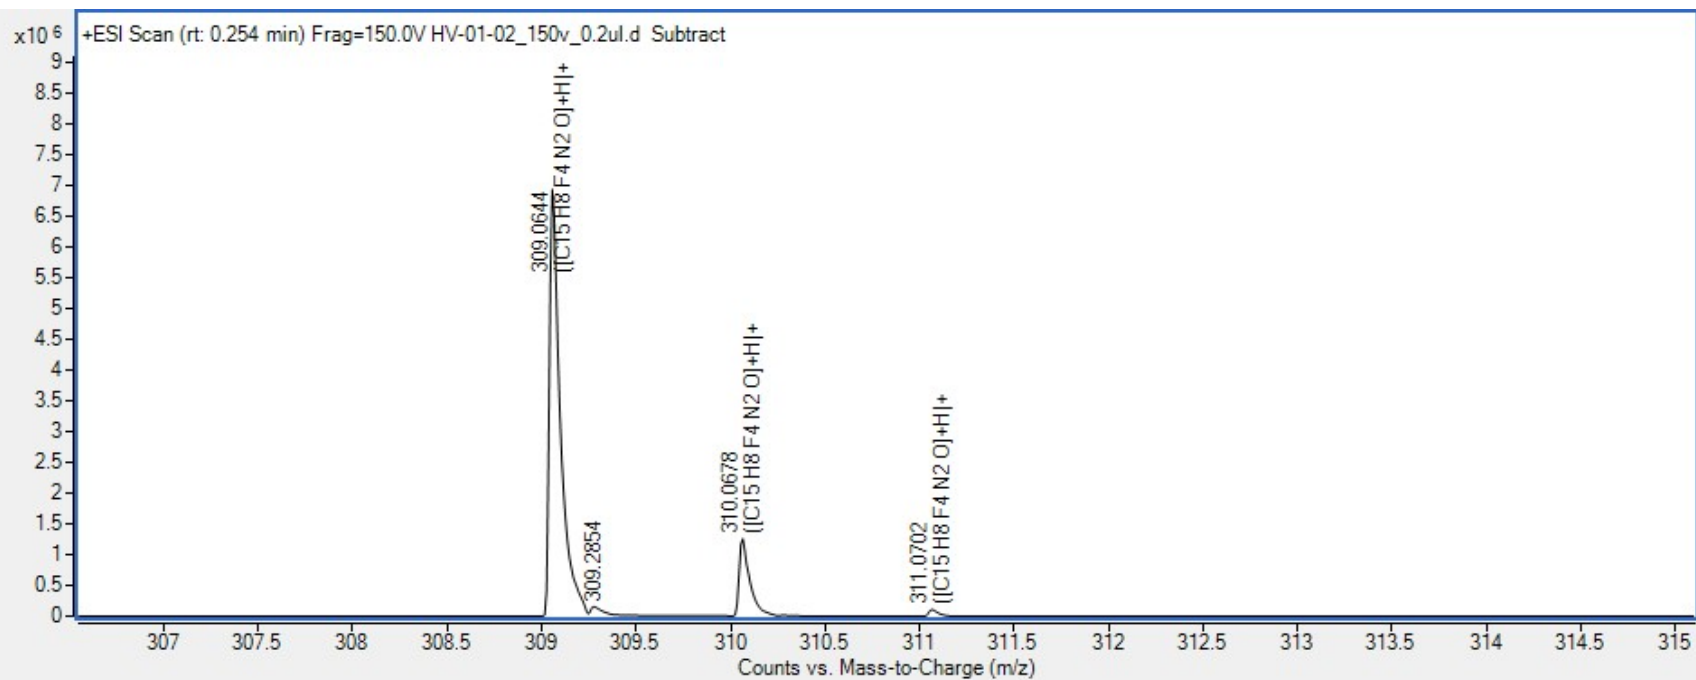

| Formula,        | Species,             | m/z,      | Score, | Diff (abs. ppm), | Mass     |
|-----------------|----------------------|-----------|--------|------------------|----------|
| C15 H8 F4 N2 O, | (M+H) <sup>+</sup> , | 309.0644, | 99.61, | 0.28,            | 308.0572 |

2-(4-bromophenyl)-5-(4-fluorophenyl)-2,4-dihydro-3H-pyrazol-3-one (P13): <sup>1</sup>H-NMR (CDCl<sub>3</sub>)

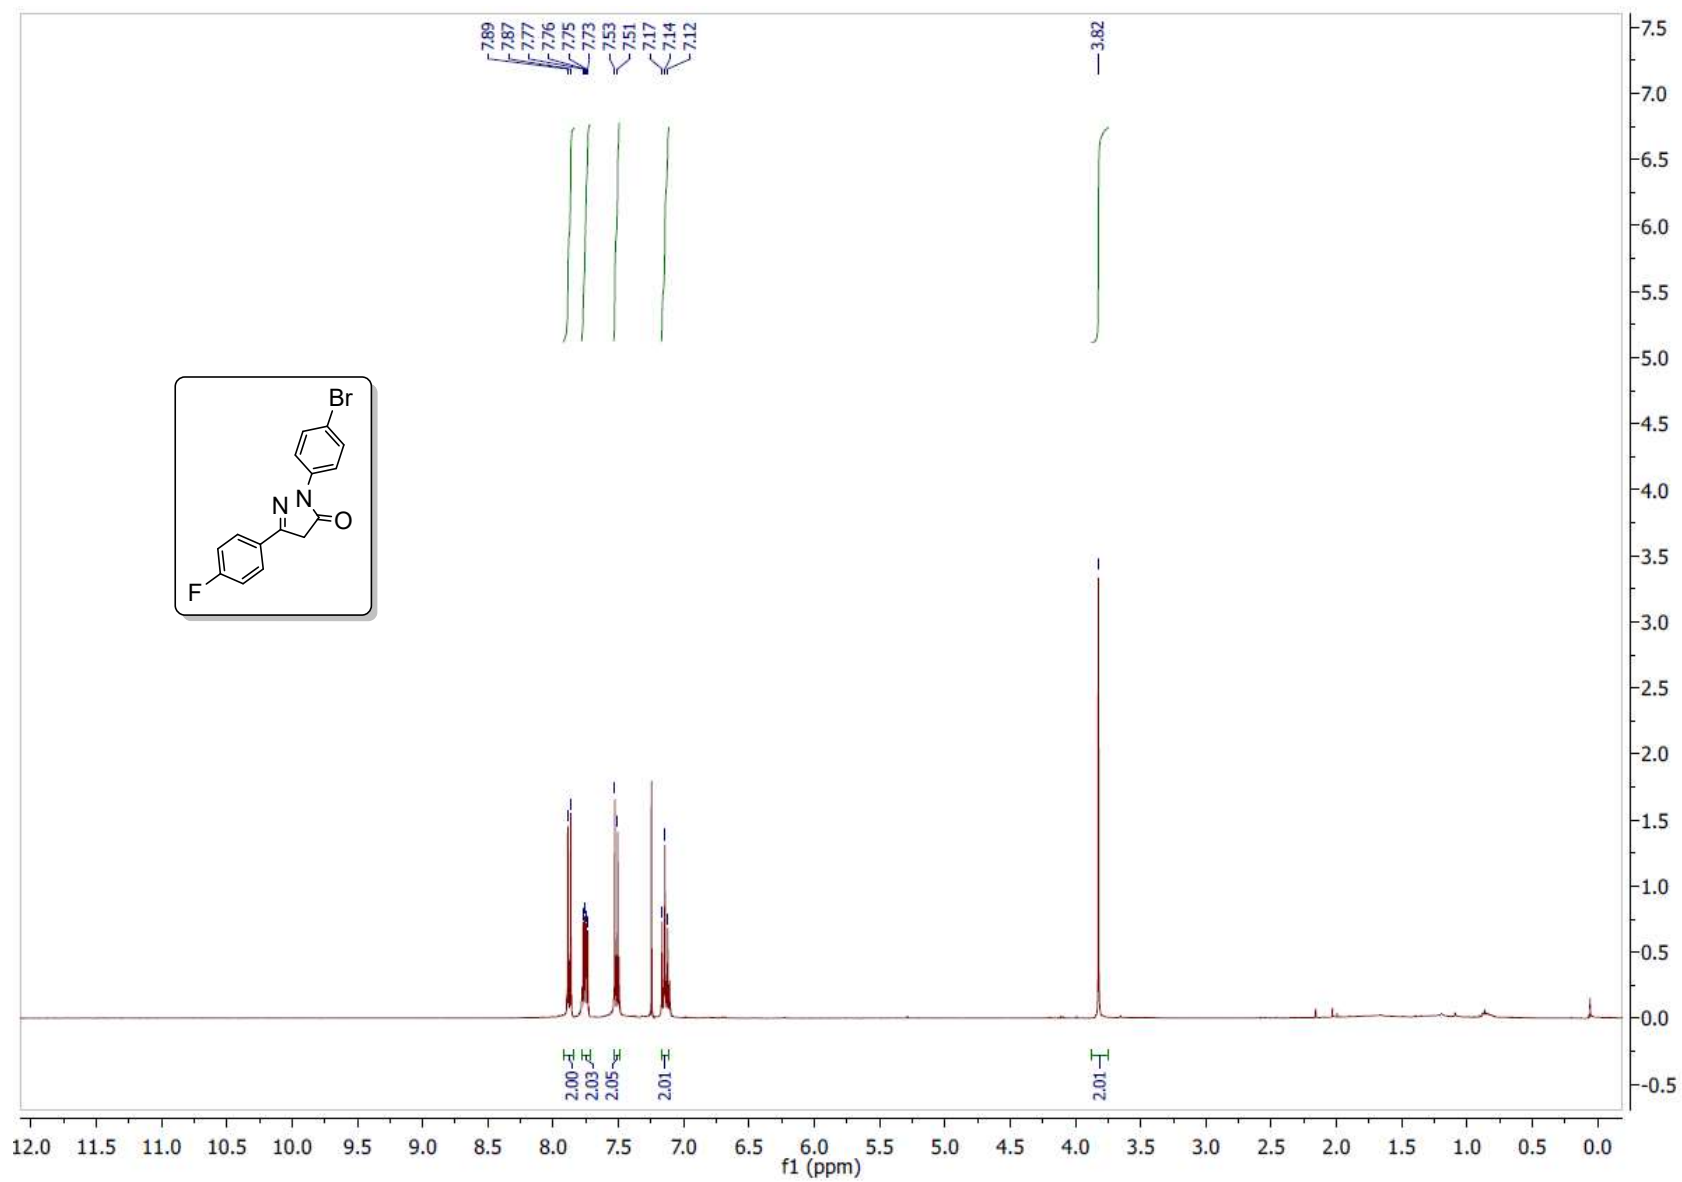

2-(4-bromophenyl)-5-(4-fluorophenyl)-2,4-dihydro-3H-pyrazol-3-one (P13):  $^{13}\text{C}$ -NMR ( $\text{CDCl}_3$ )

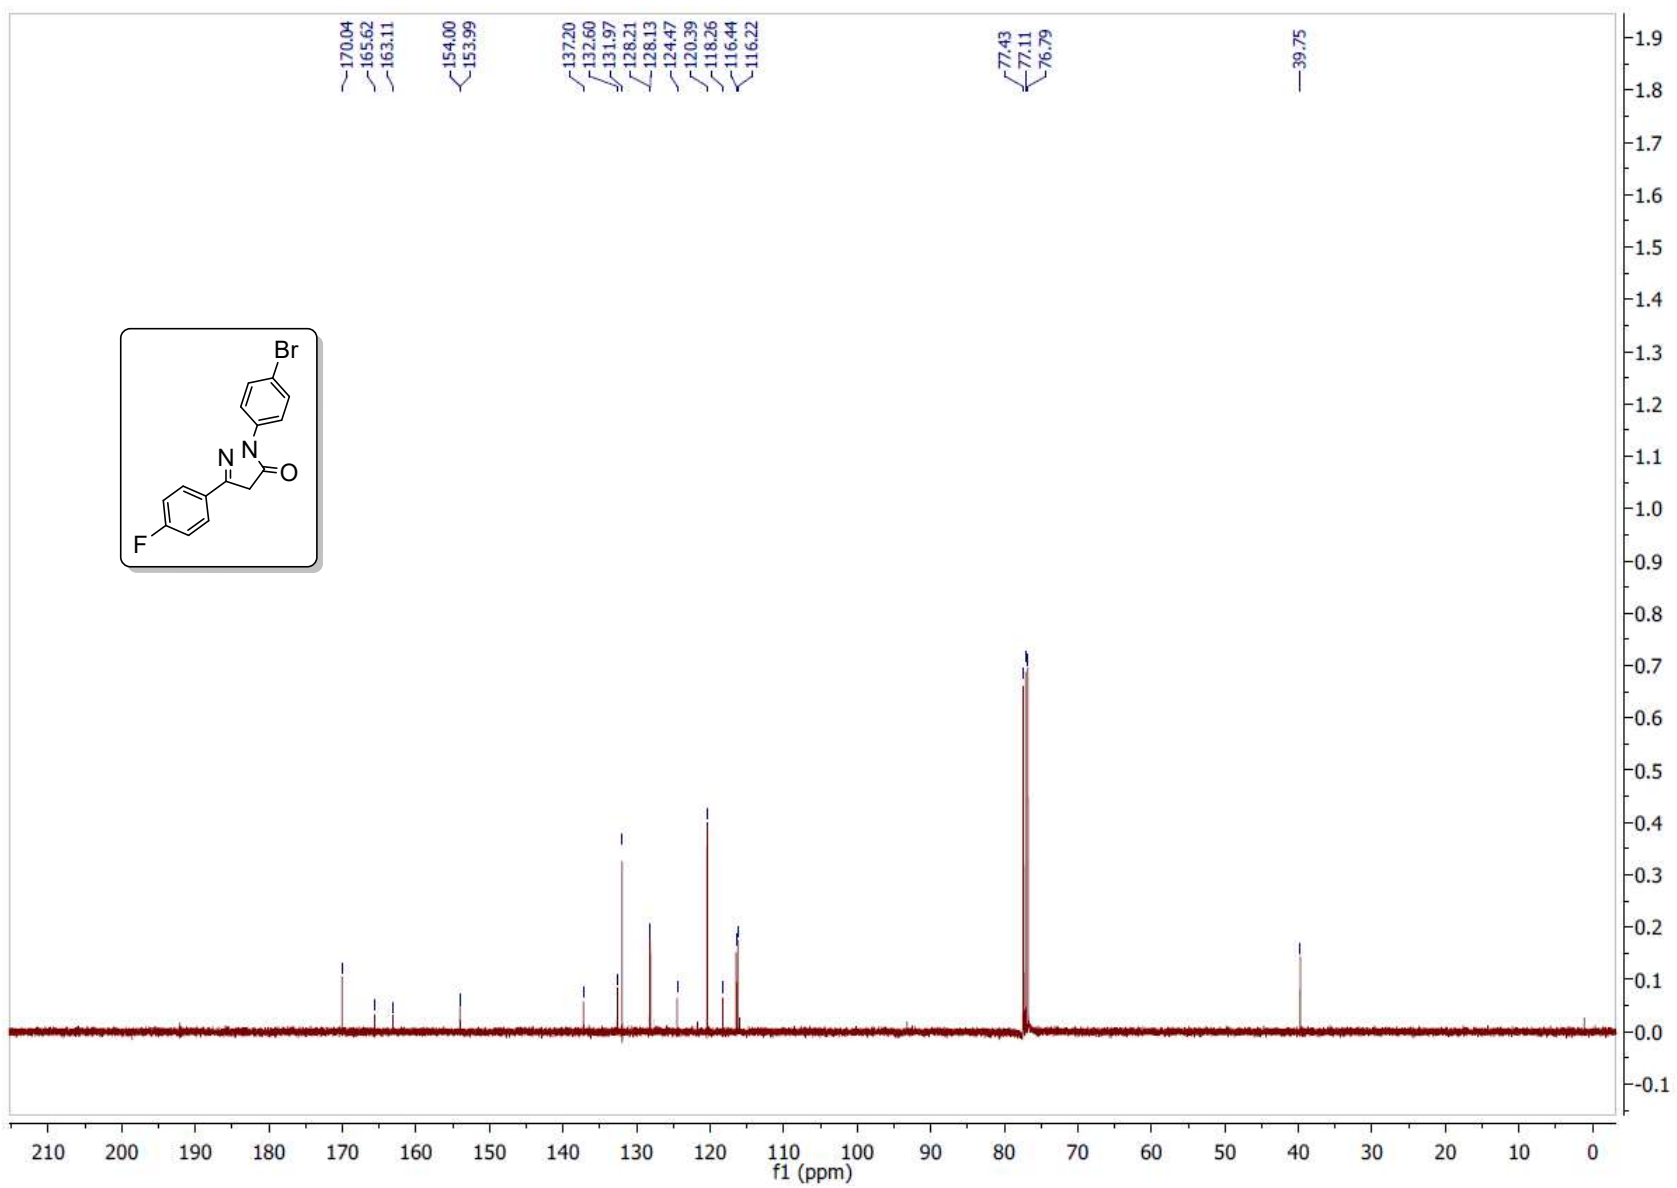

**2-(4-bromophenyl)-5-(4-fluorophenyl)-2,4-dihydro-3H-pyrazol-3-one (P13): ESI-MS**

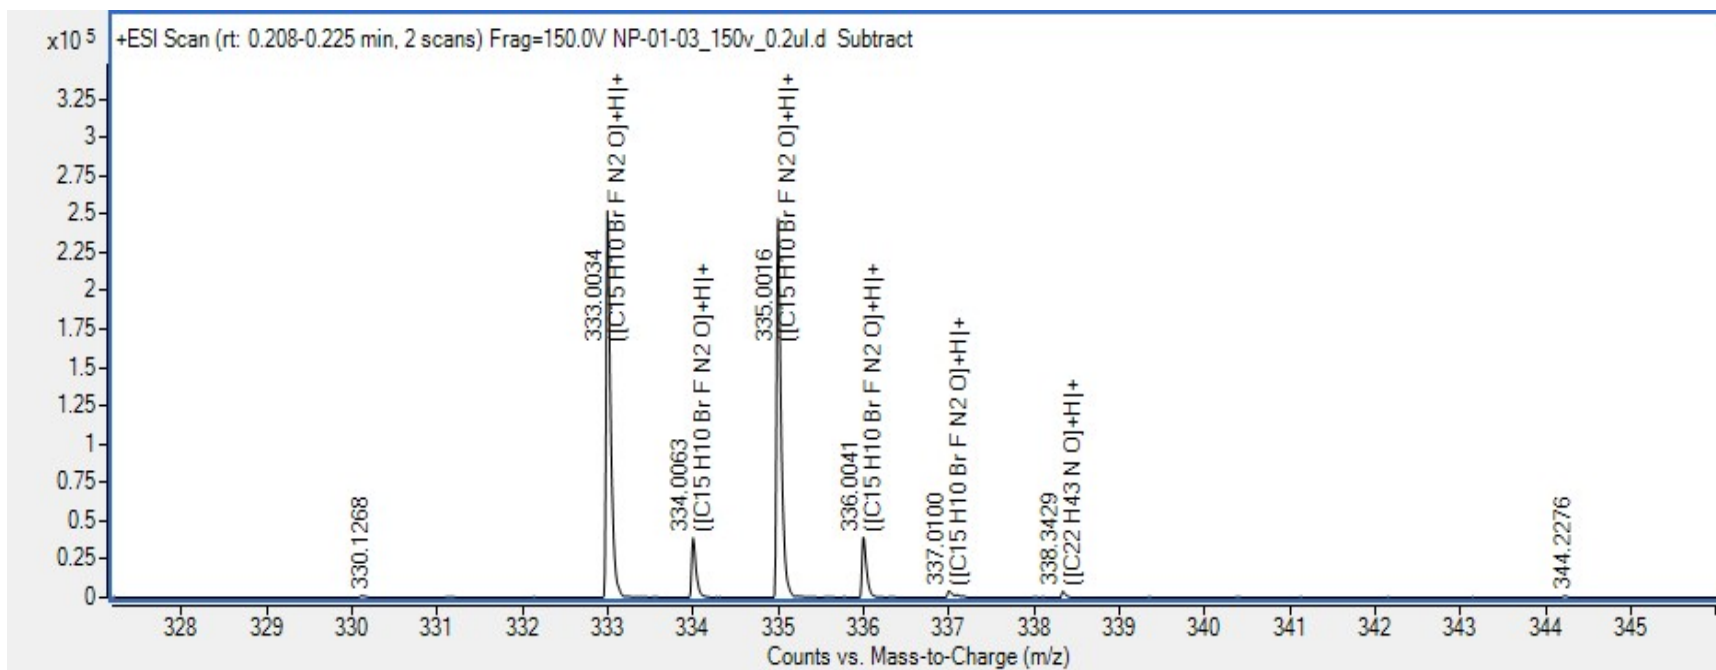

| Formula,           | Species, | m/z,      | Score, | Diff (abs. ppm), | Mass     |
|--------------------|----------|-----------|--------|------------------|----------|
| C15 H10 Br F N2 O, | (M+H)+,  | 333.0034, | 99.67, | 0.28,            | 331.9961 |

2,5-bis(4-bromophenyl)-2,4-dihydro-3H-pyrazol-3-one (P14):  $^1\text{H-NMR}$  ( $\text{CDCl}_3$ )

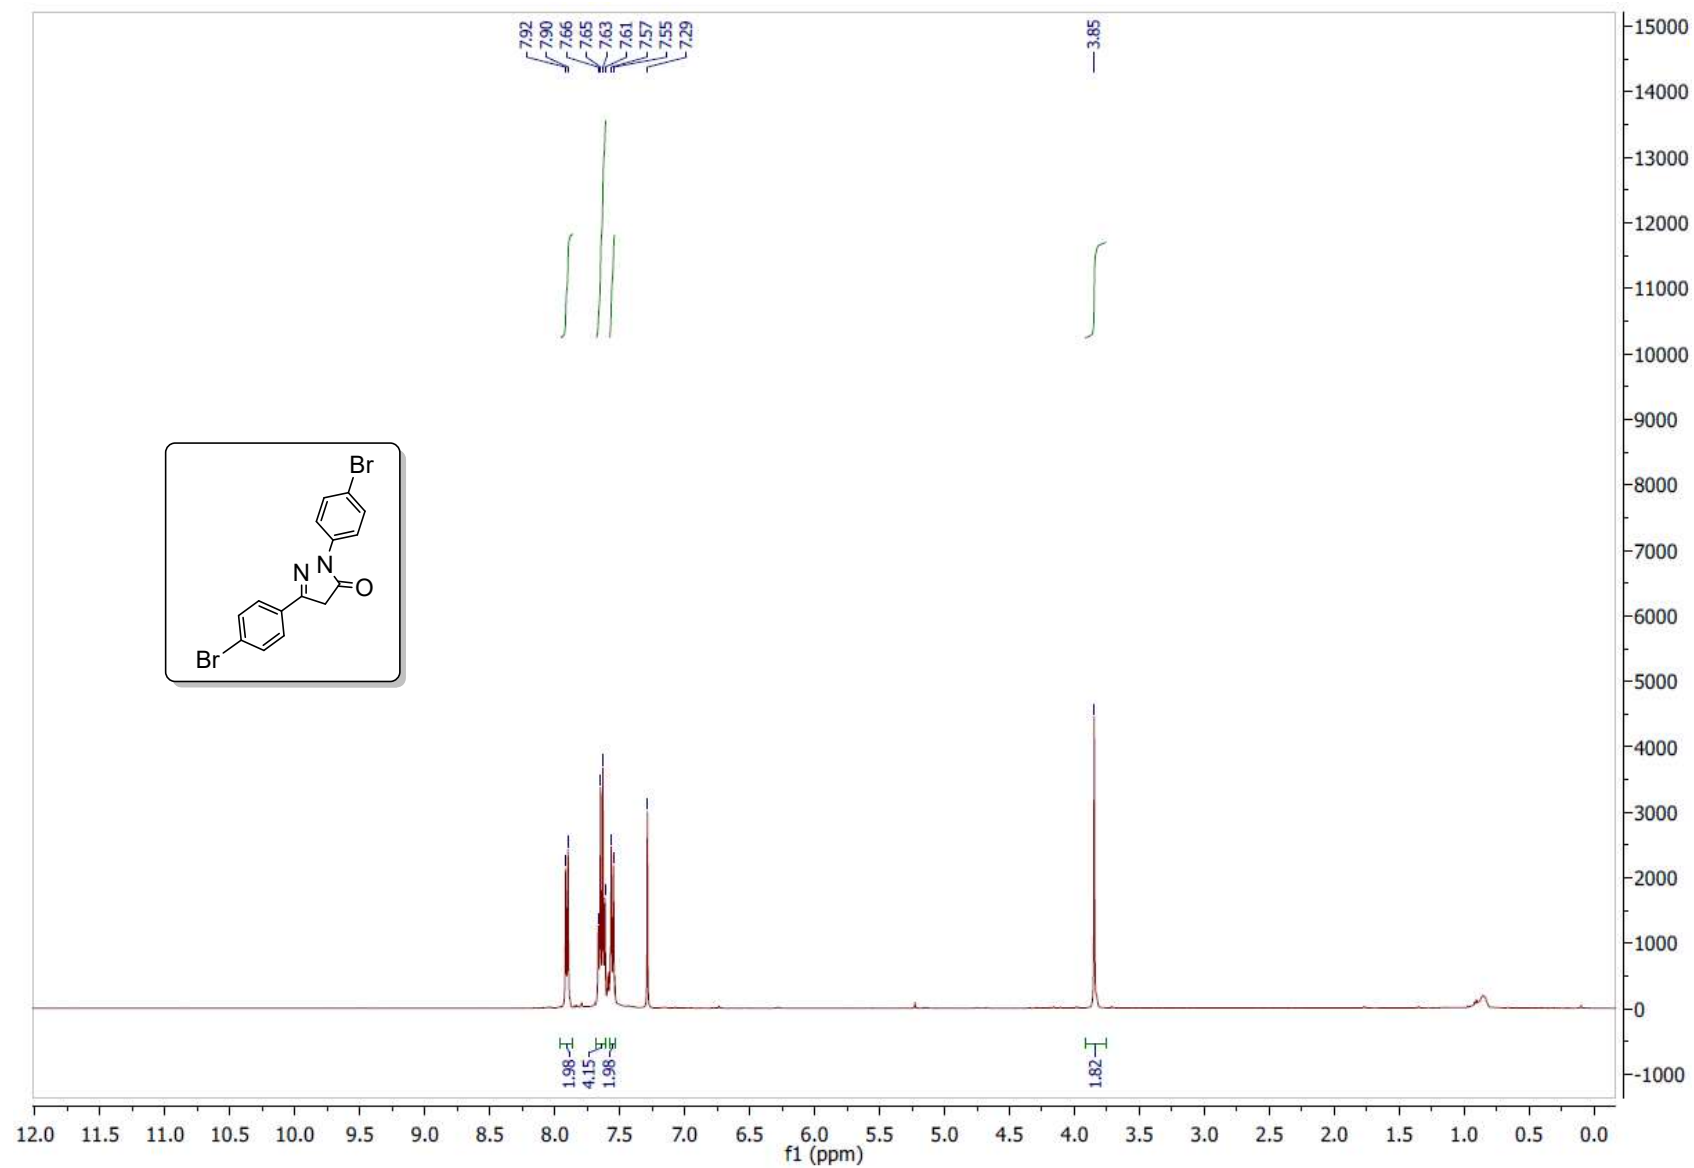

2,5-bis(4-bromophenyl)-2,4-dihydro-3H-pyrazol-3-one (P14):  $^{13}\text{C}$ -NMR ( $\text{CDCl}_3$ )

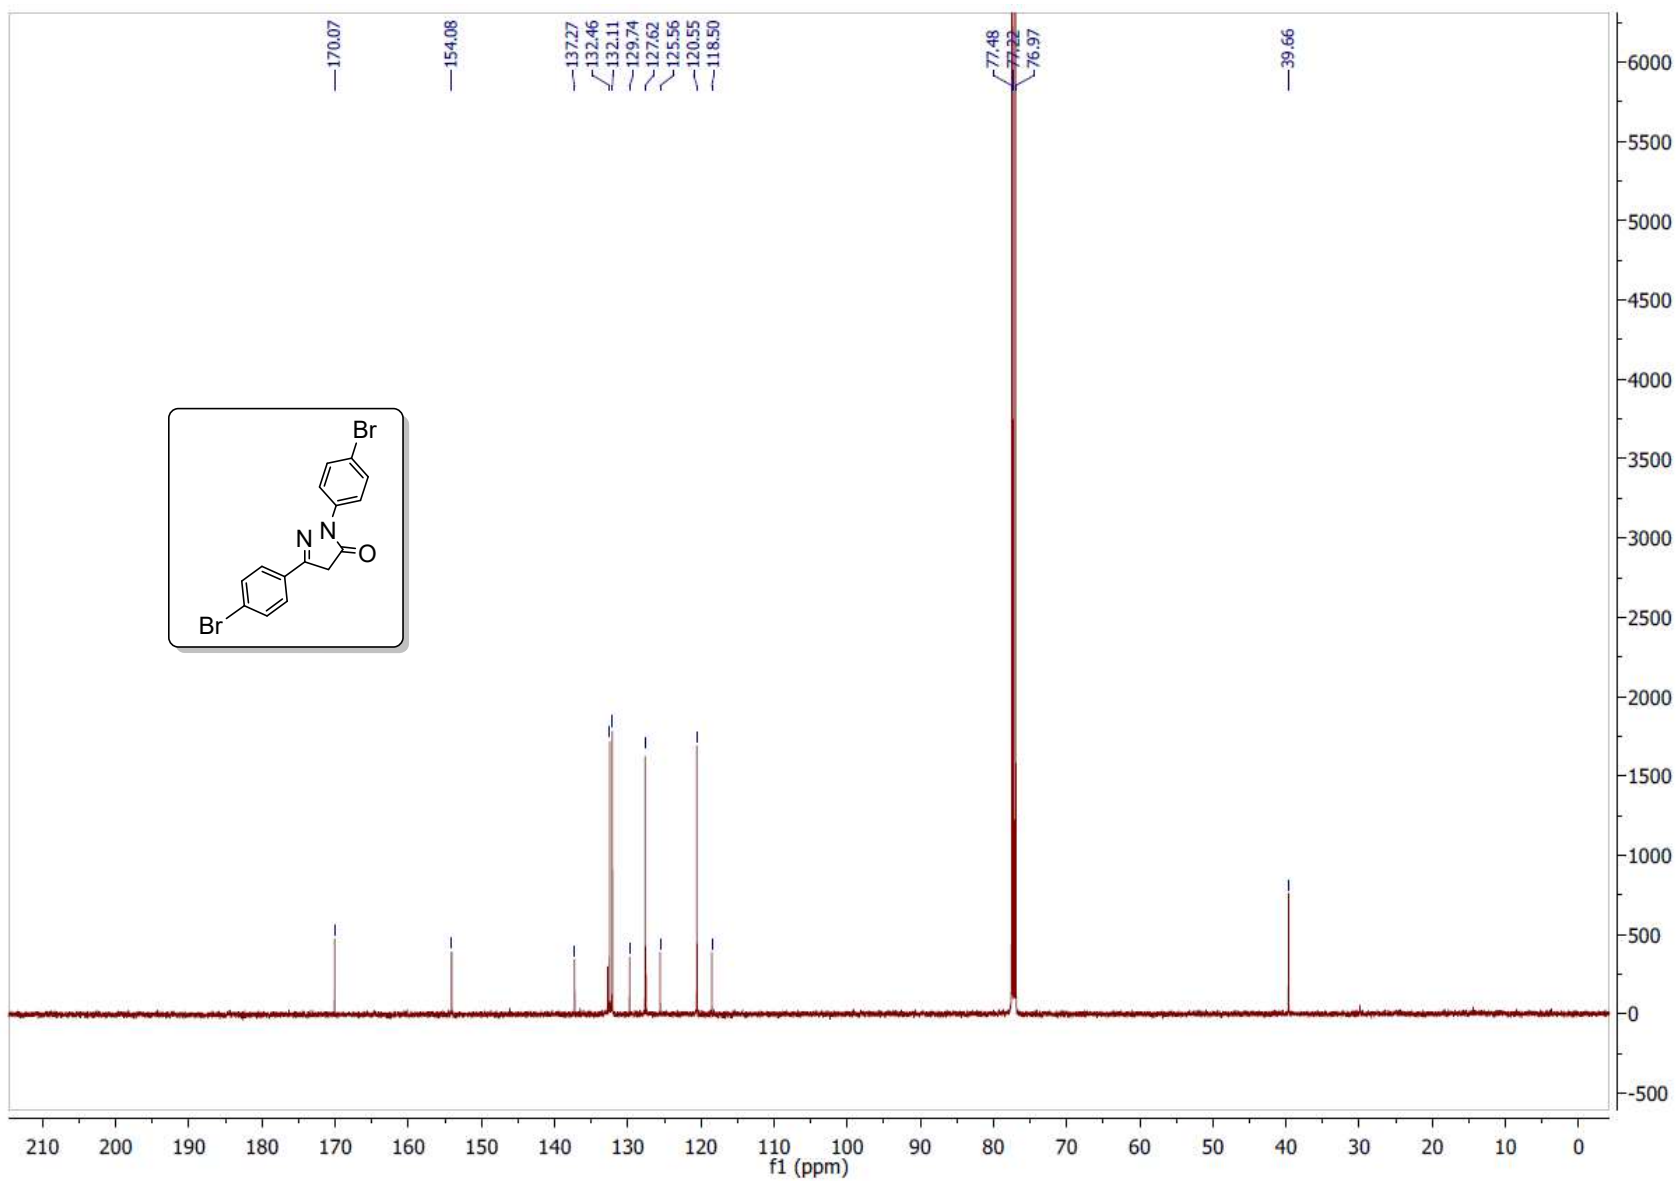



**2,5-bis(4-bromophenyl)-2,4-dihydro-3H-pyrazol-3-one (P14): ESI-MS**

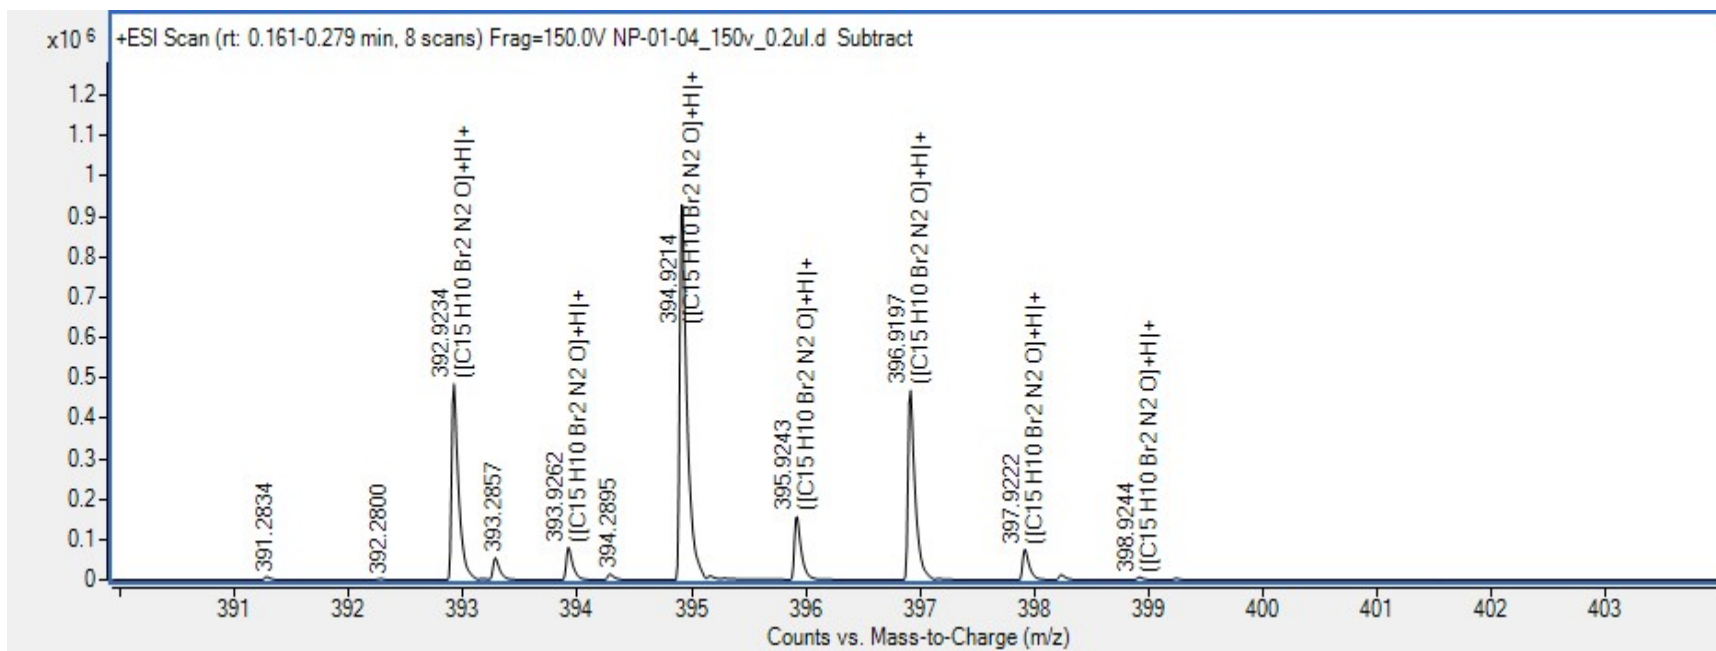

| Formula,                                                          | Species,             | m/z,      | Score, | Diff (abs. ppm), | Mass     |
|-------------------------------------------------------------------|----------------------|-----------|--------|------------------|----------|
| C <sub>15</sub> H <sub>10</sub> Br <sub>2</sub> N <sub>2</sub> O, | (M+H) <sup>+</sup> , | 392.9234, | 99.77, | 0.28,            | 391.9161 |

2-(4-bromophenyl)-5-(2-fluorophenyl)-2,4-dihydro-3H-pyrazol-3-one (P15):  $^1\text{H-NMR}$  ( $\text{CDCl}_3$ )

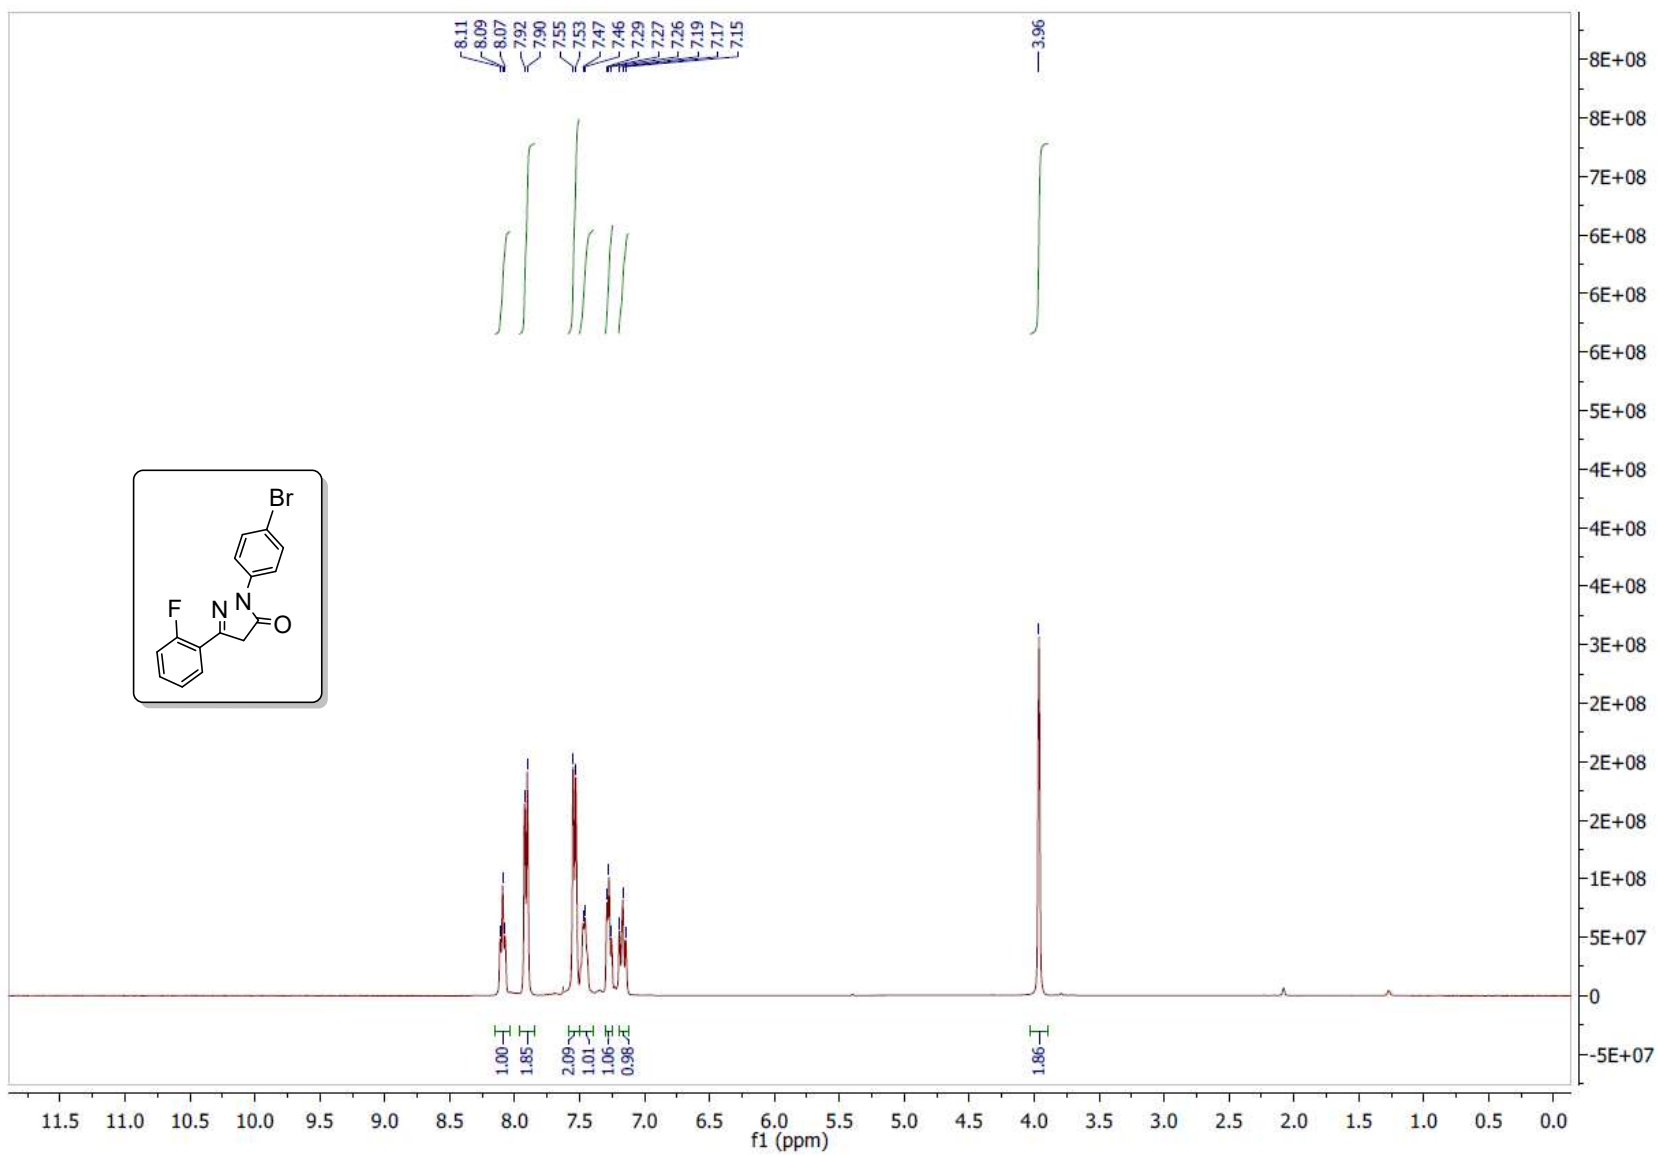

2-(4-bromophenyl)-5-(2-fluorophenyl)-2,4-dihydro-3H-pyrazol-3-one (P15):  $^{13}\text{C}$ -NMR ( $\text{CDCl}_3$ )

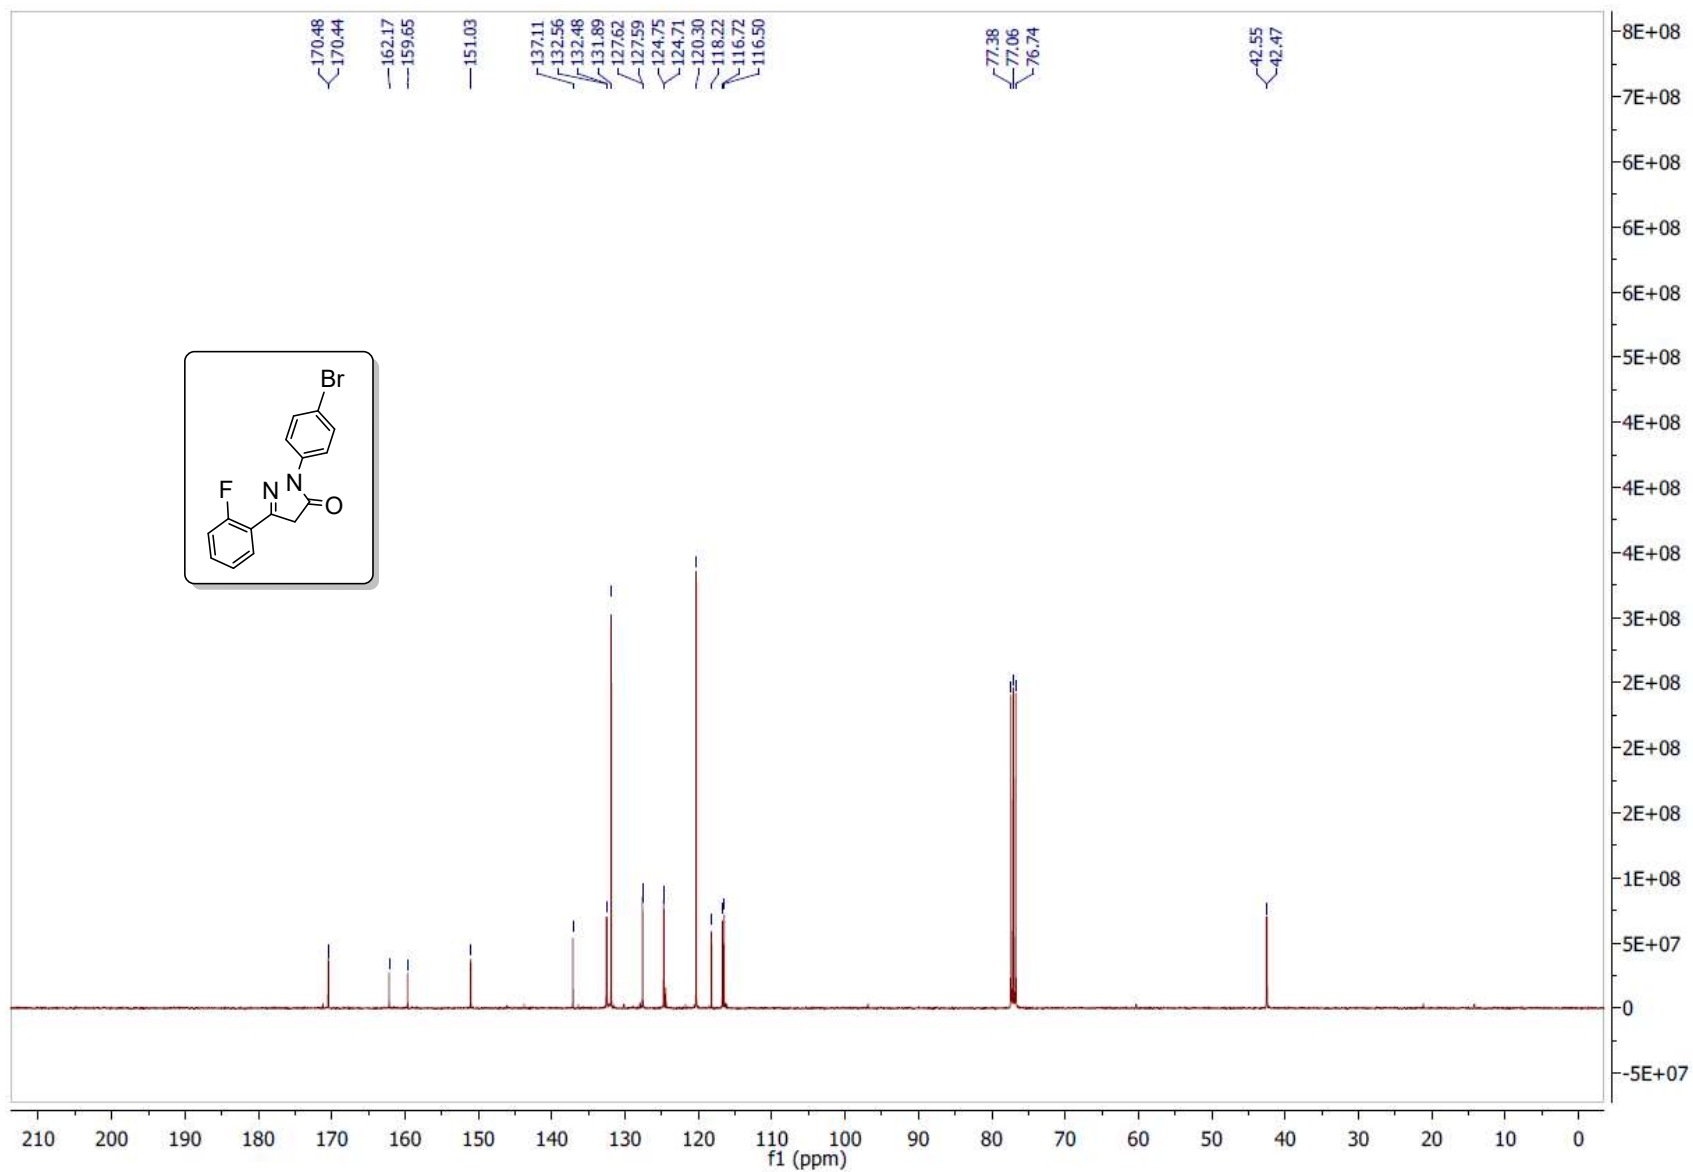

**2-(4-bromophenyl)-5-(2-fluorophenyl)-2,4-dihydro-3H-pyrazol-3-one (P15):**

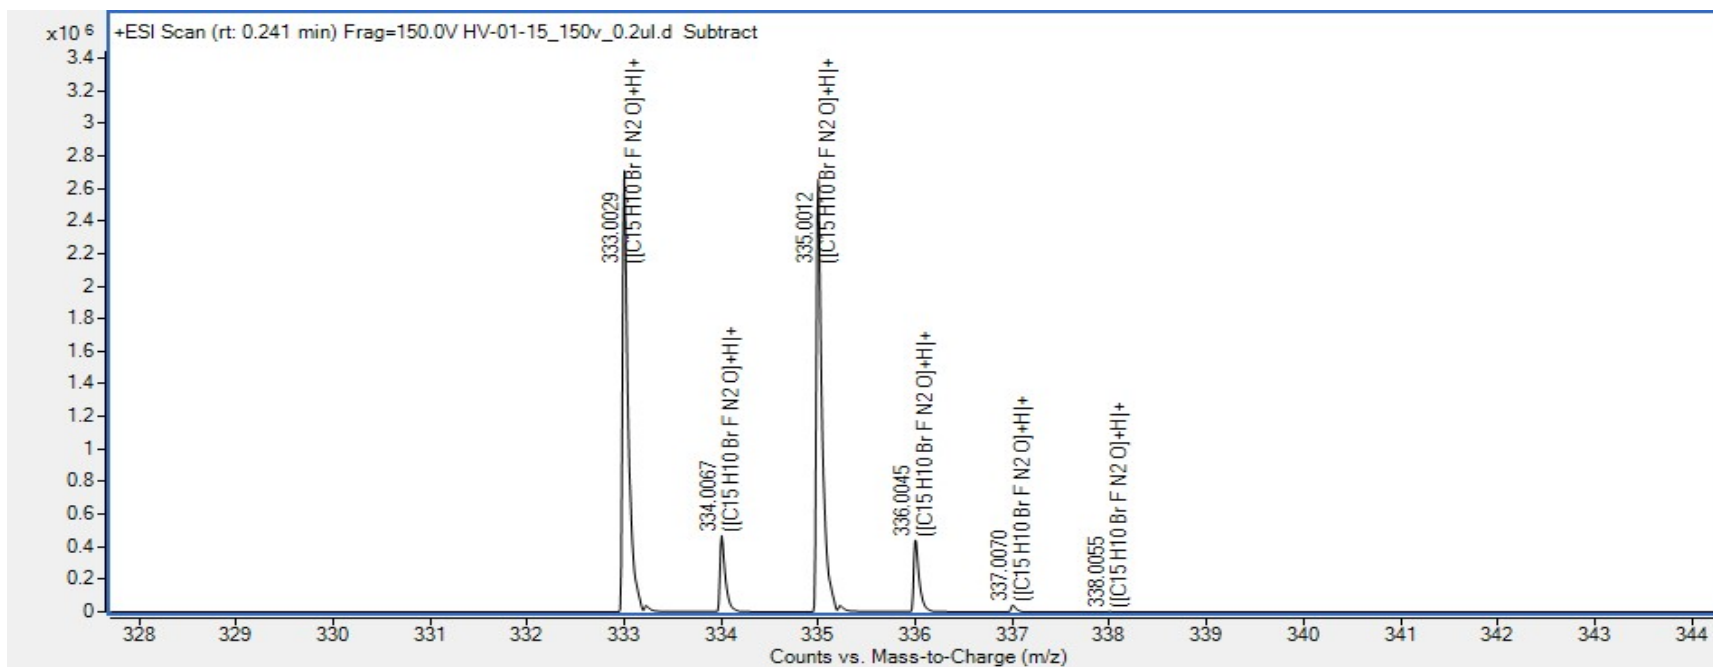

| Formula,           | Species,             | m/z,      | Score, | Diff (abs. ppm), | Mass     |
|--------------------|----------------------|-----------|--------|------------------|----------|
| C15 H10 Br F N2 O, | (M+H) <sup>+</sup> , | 333.0029, | 99.19, | 0.73,            | 331.9958 |

1-(4-bromophenyl)-5-ethoxy-3-(2-fluorophenyl)-1H-pyrazole (P15'):  $^1\text{H-NMR}$  ( $\text{CDCl}_3$ )

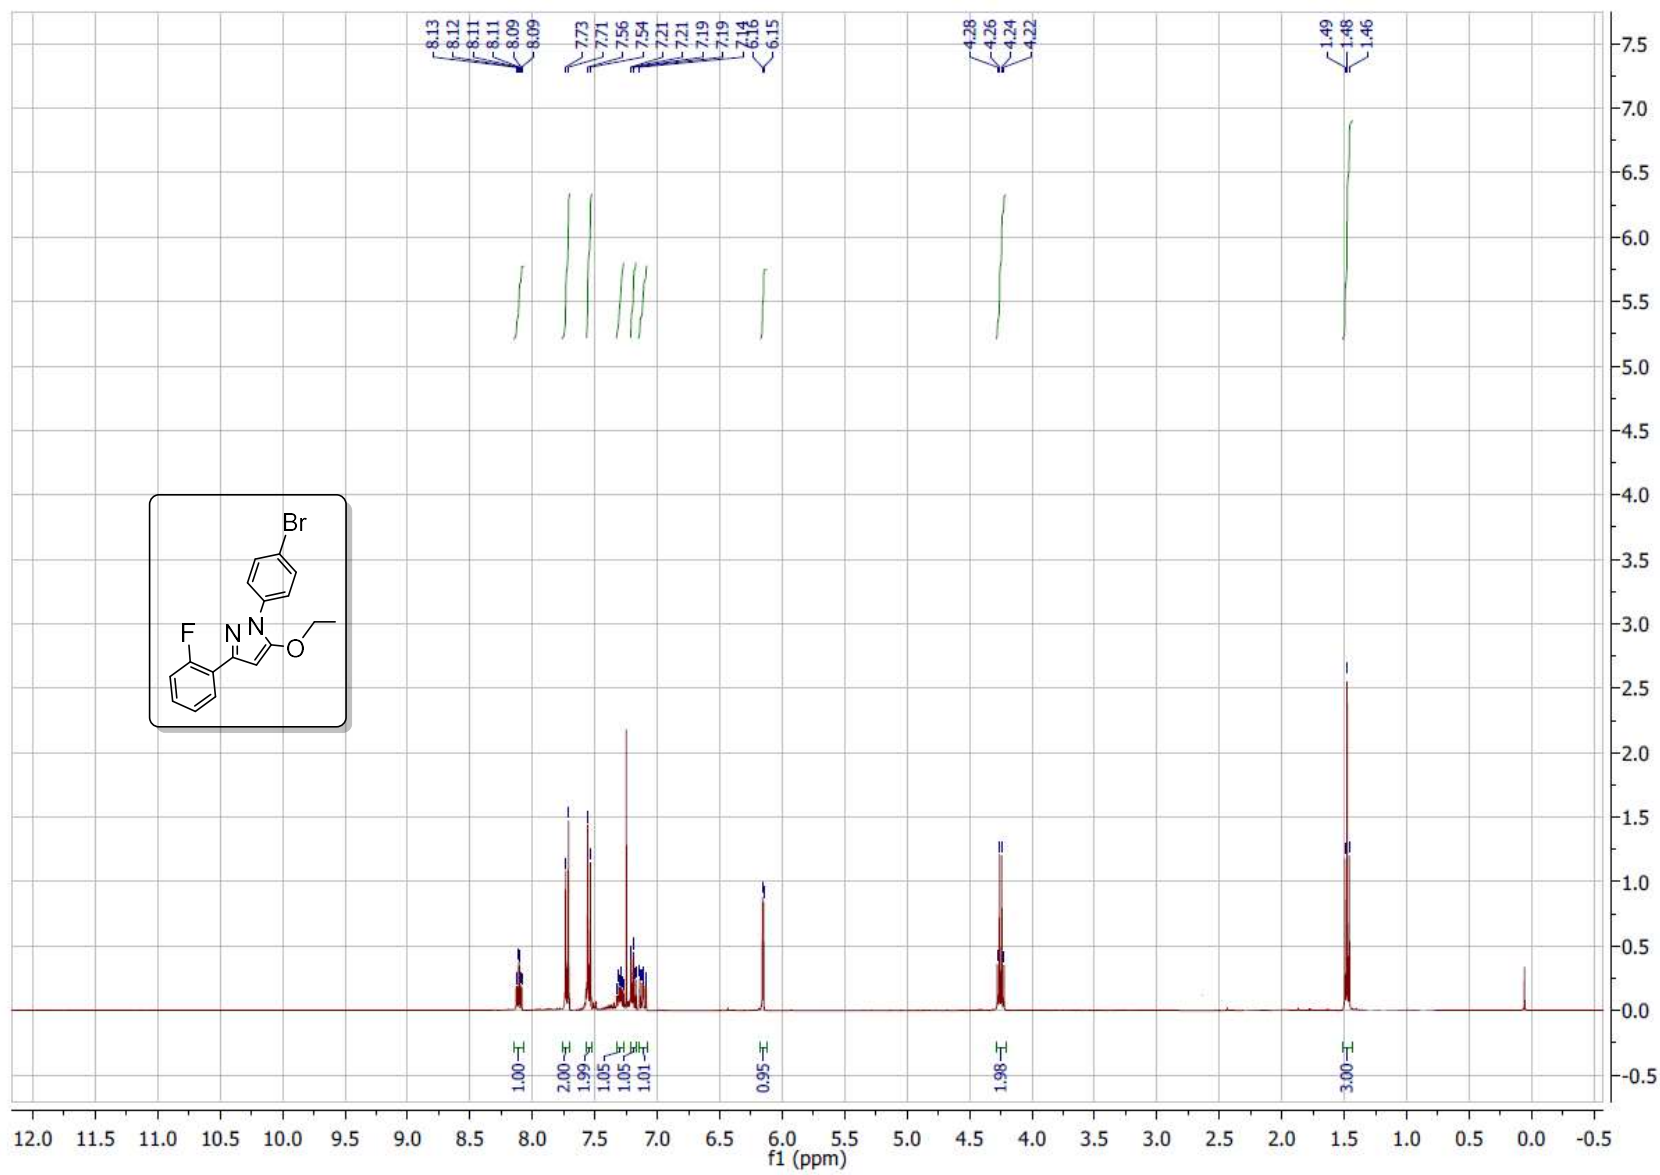

1-(4-bromophenyl)-5-ethoxy-3-(2-fluorophenyl)-1H-pyrazole (P15'):  $^{13}\text{C}$ -NMR ( $\text{CDCl}_3$ )

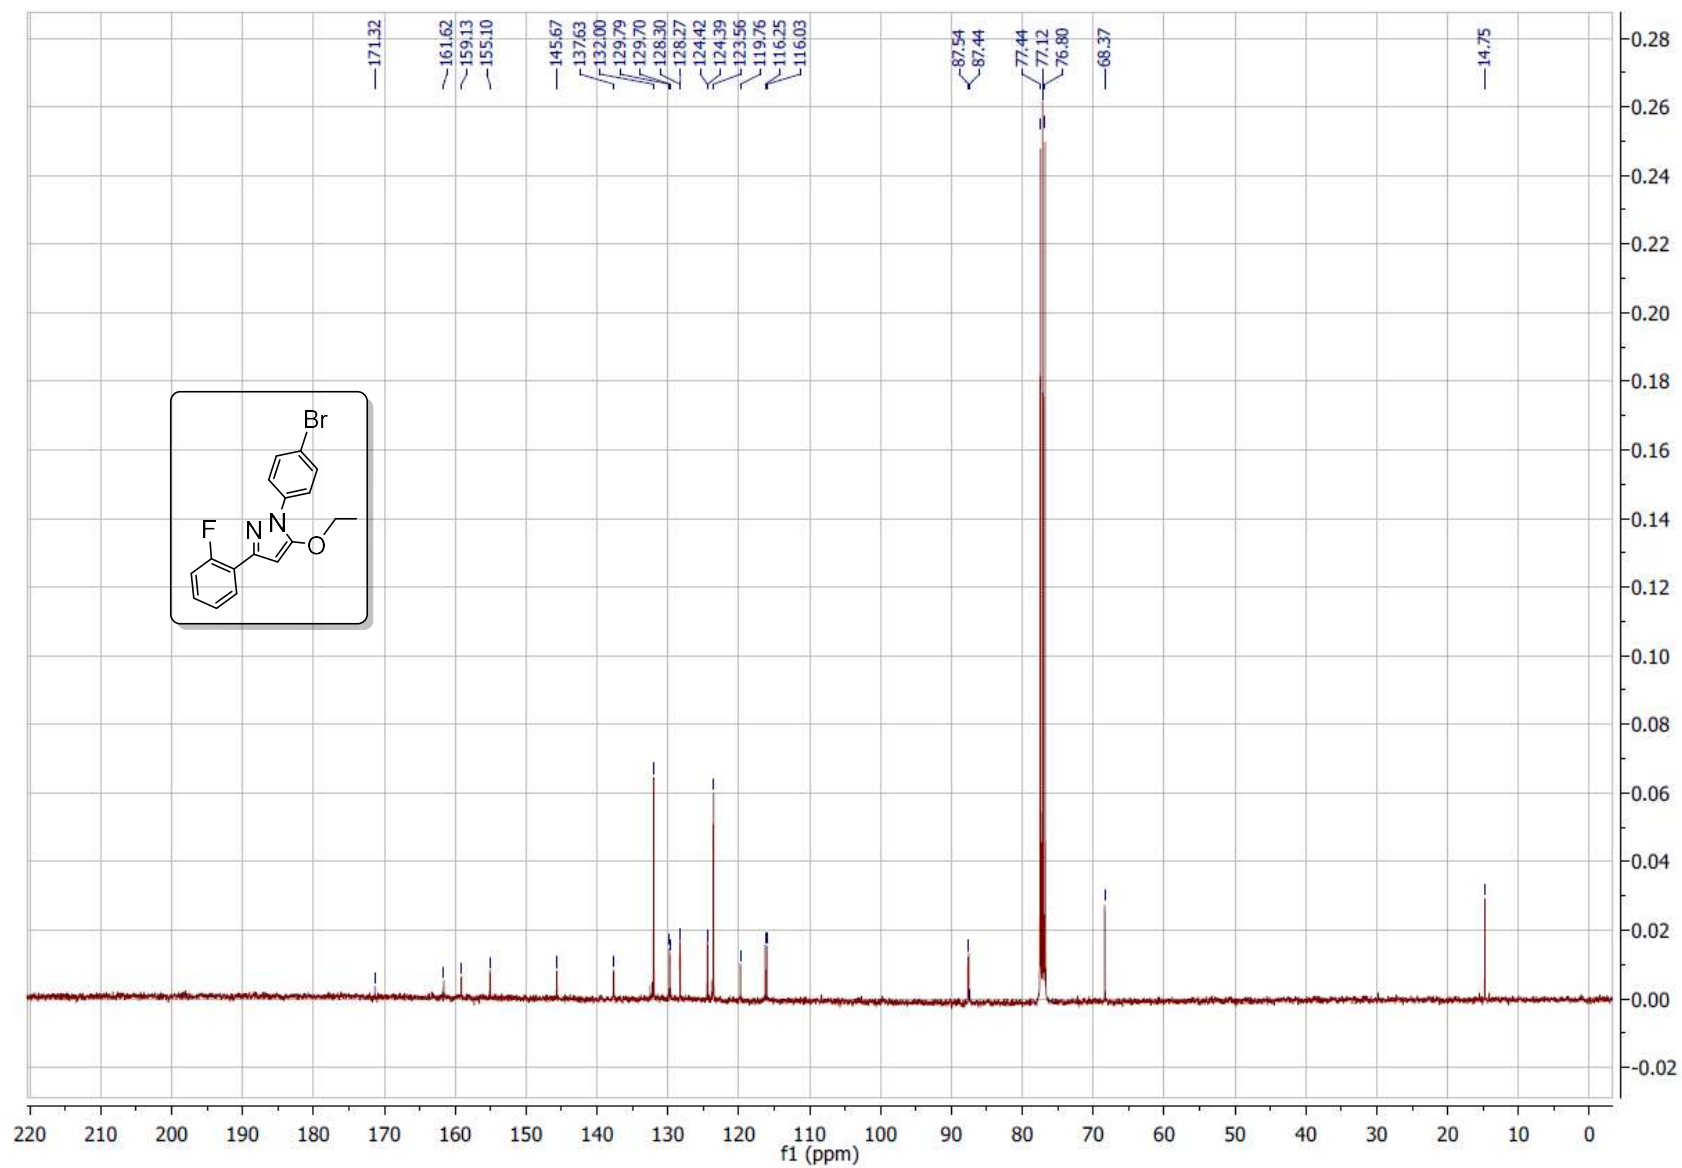

5-(4-bromophenyl)-2-(4-(trifluoromethyl)phenyl)-2,4-dihydro-3H-pyrazol-3-one (P16):  $^1\text{H-NMR}$  ( $\text{CDCl}_3$ )

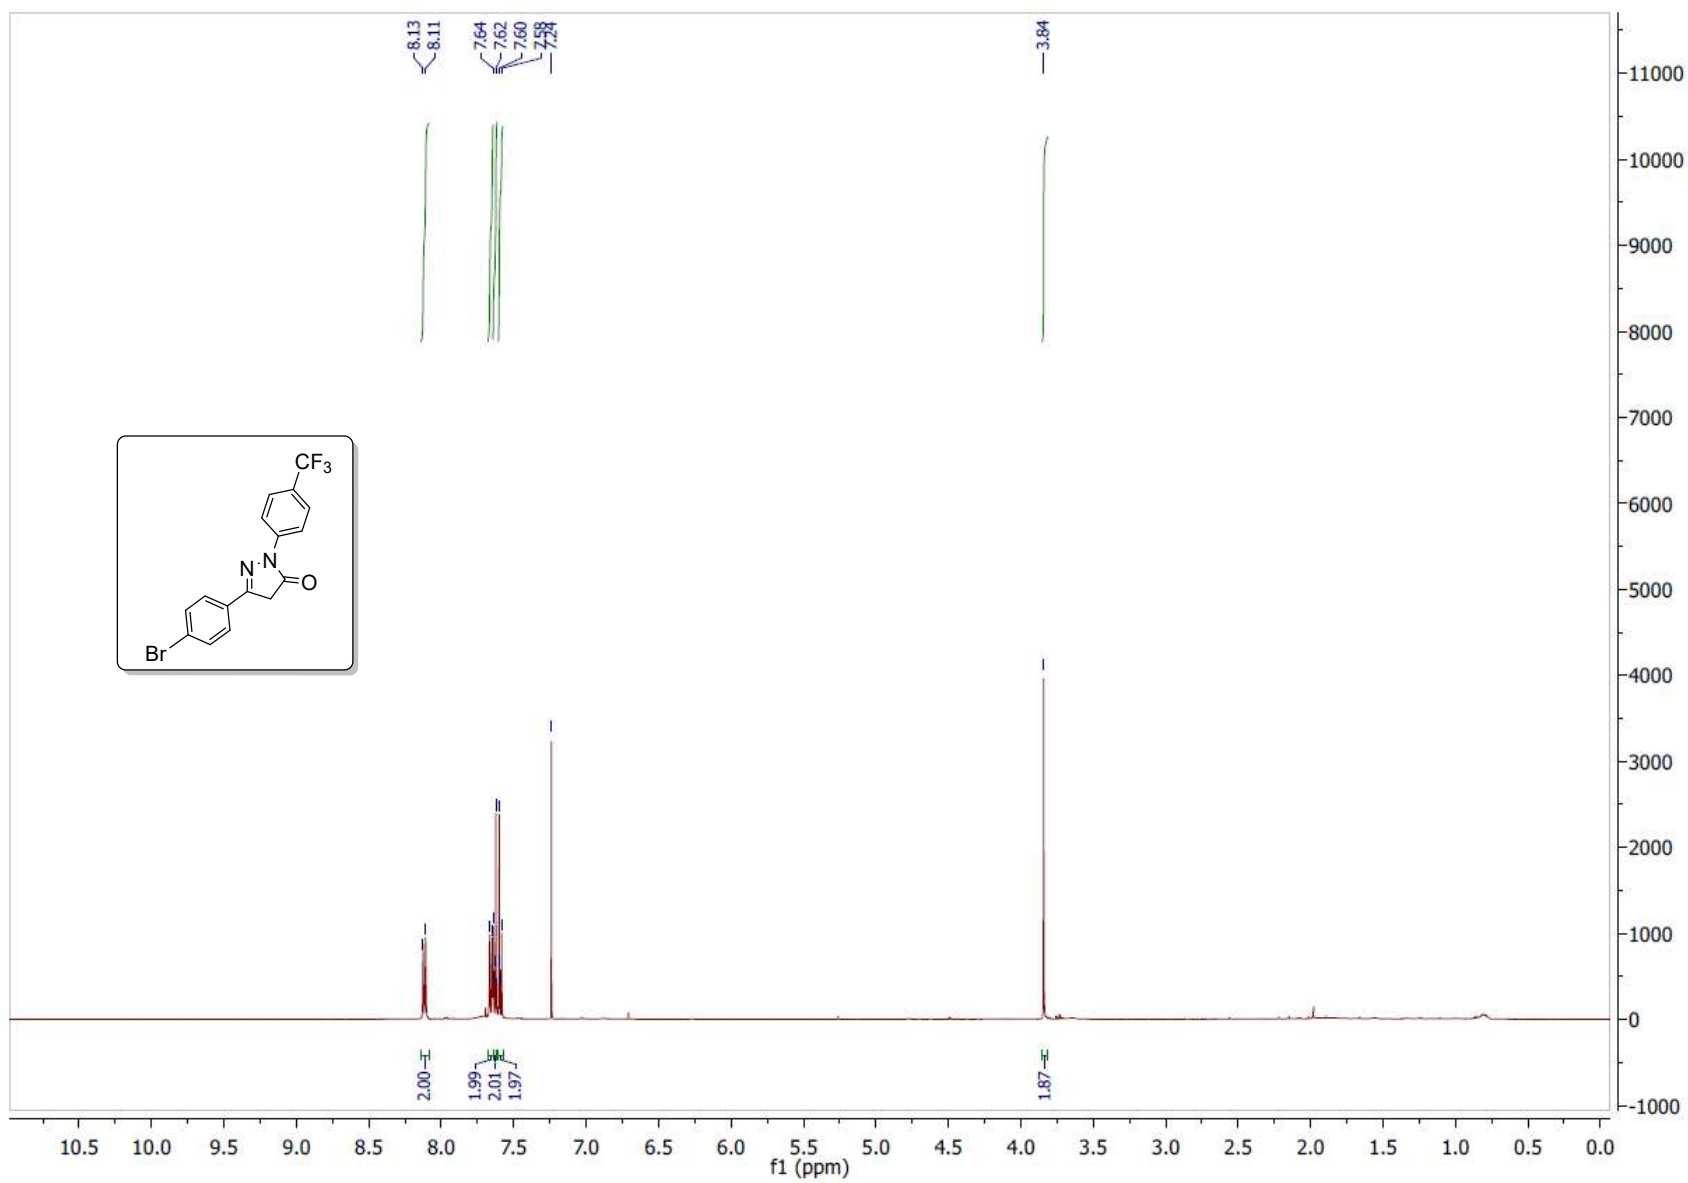

5-(4-bromophenyl)-2-(4-(trifluoromethyl)phenyl)-2,4-dihydro-3H-pyrazol-3-one (P16):  $^{13}\text{C}$ -NMR ( $\text{CDCl}_3$ )

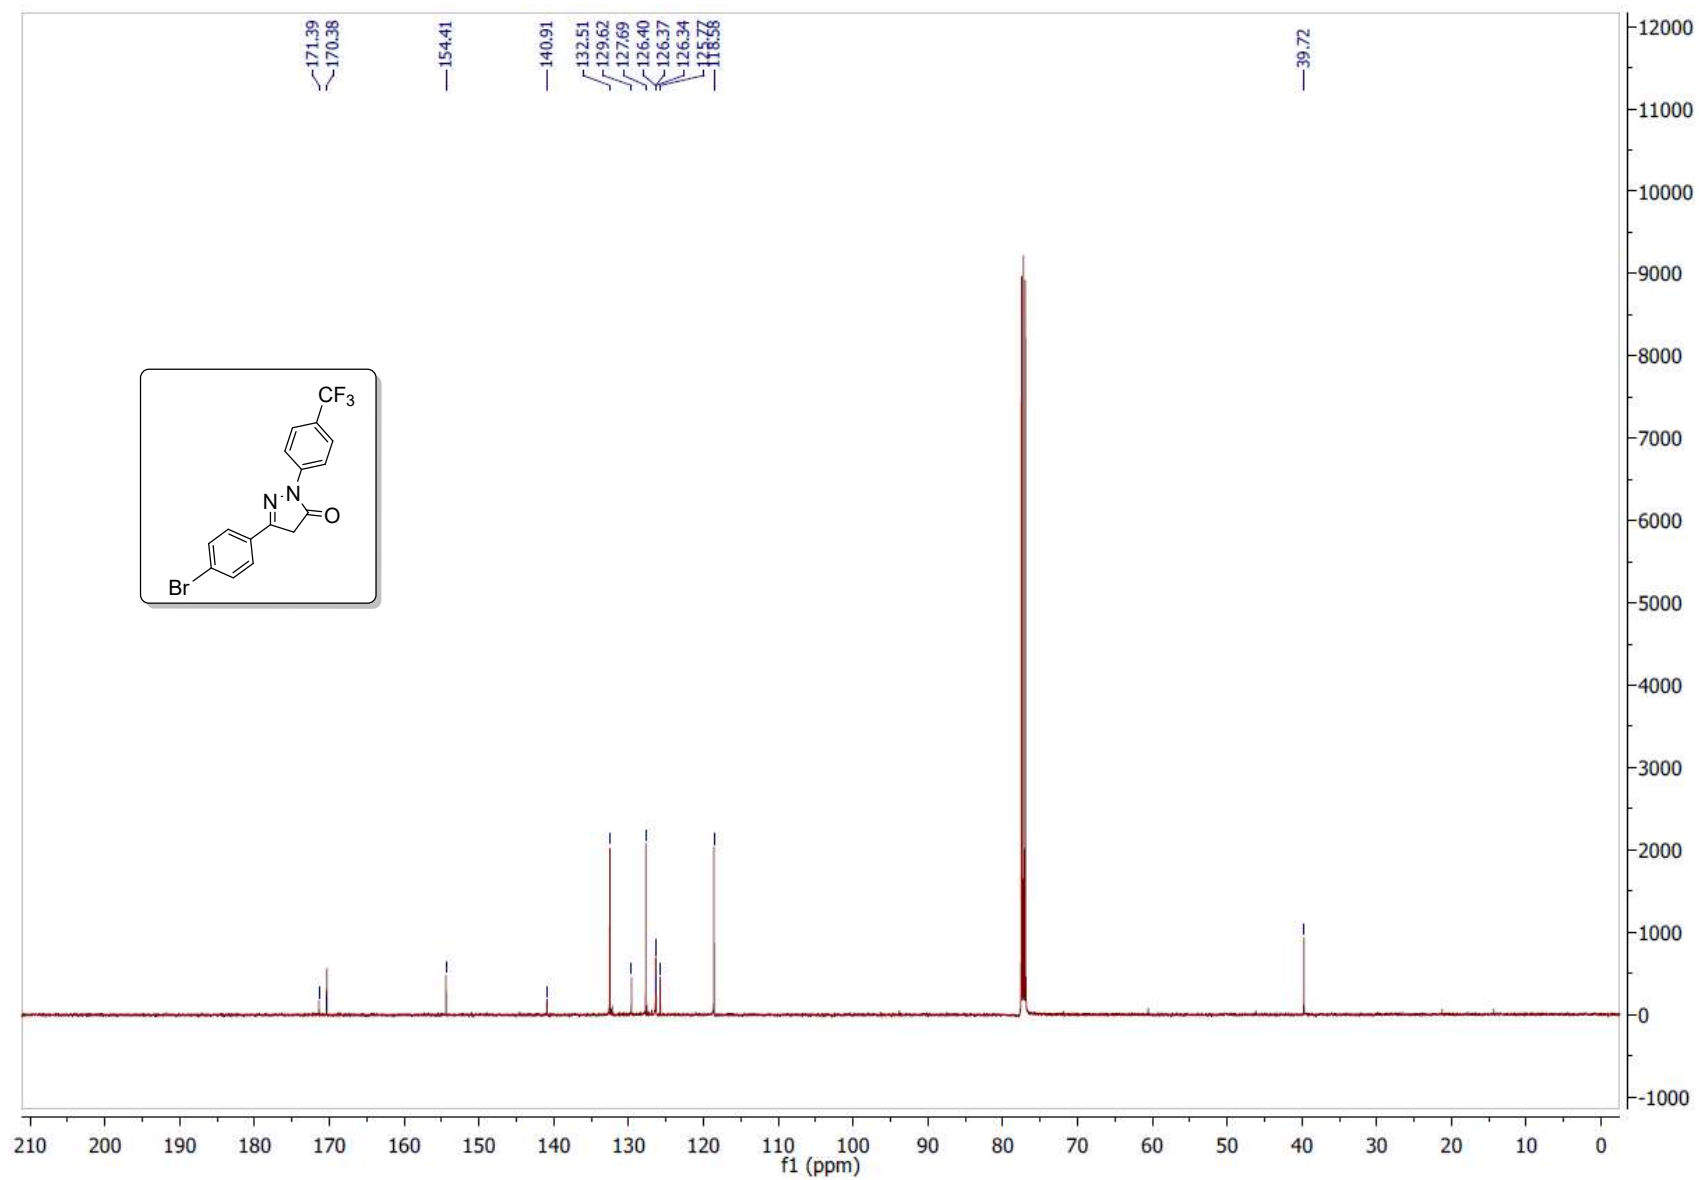



**5-(4-bromophenyl)-2-(4-(trifluoromethyl)phenyl)-2,4-dihydro-3H-pyrazol-3-one (P16): ESI-MS**

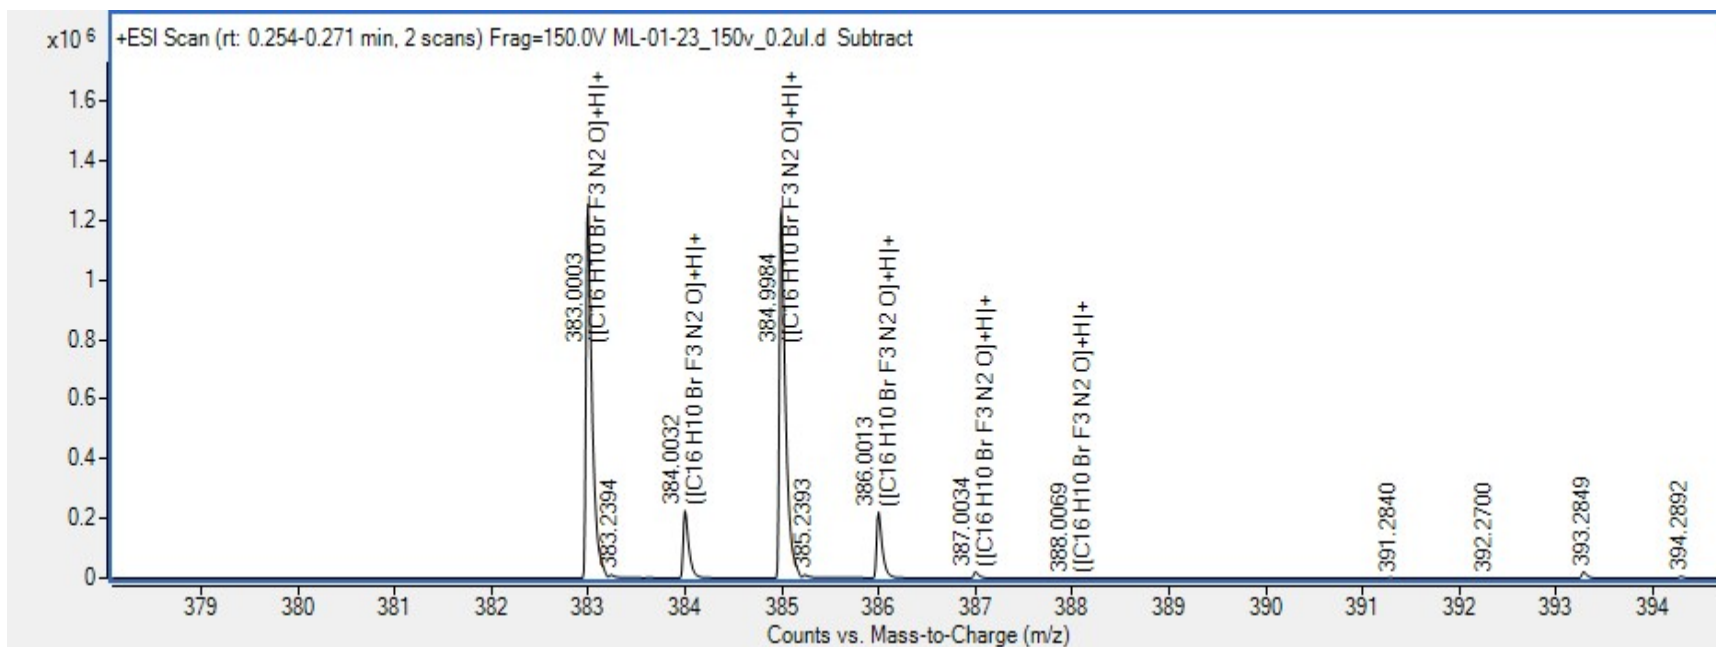

| Formula,            | Species,             | m/z,      | Score, | Diff (abs. ppm), | Mass    |
|---------------------|----------------------|-----------|--------|------------------|---------|
| C16 H10 Br F3 N2 O, | (M+H) <sup>+</sup> , | 383.0003, | 99.86, | 0.41,            | 381.993 |

5-(4-bromophenyl)-2-(3,5-dichlorophenyl)-2,4-dihydro-3H-pyrazol-3-one (P17):  $^1\text{H-NMR}$  ( $\text{CDCl}_3$ )

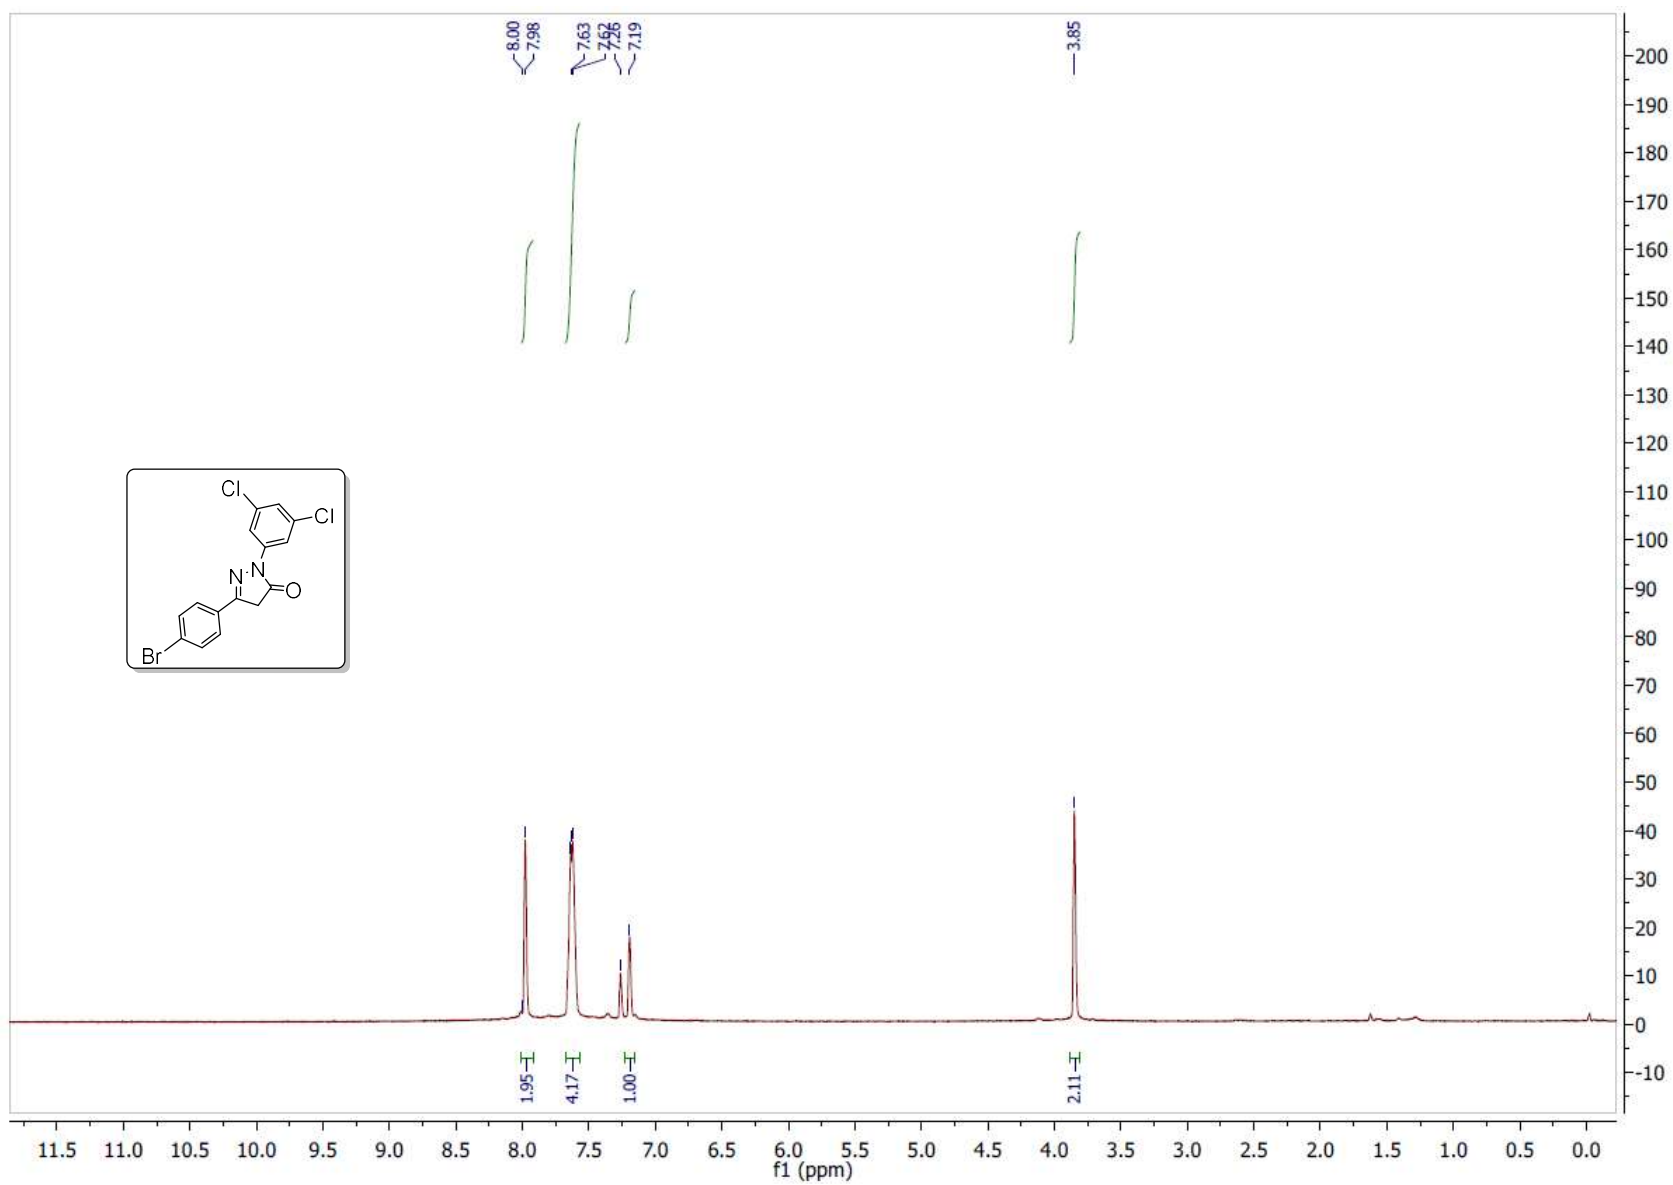

5-(4-bromophenyl)-2-(3,5-dichlorophenyl)-2,4-dihydro-3H-pyrazol-3-one (P17): <sup>13</sup>C-NMR (CDCl<sub>3</sub>)

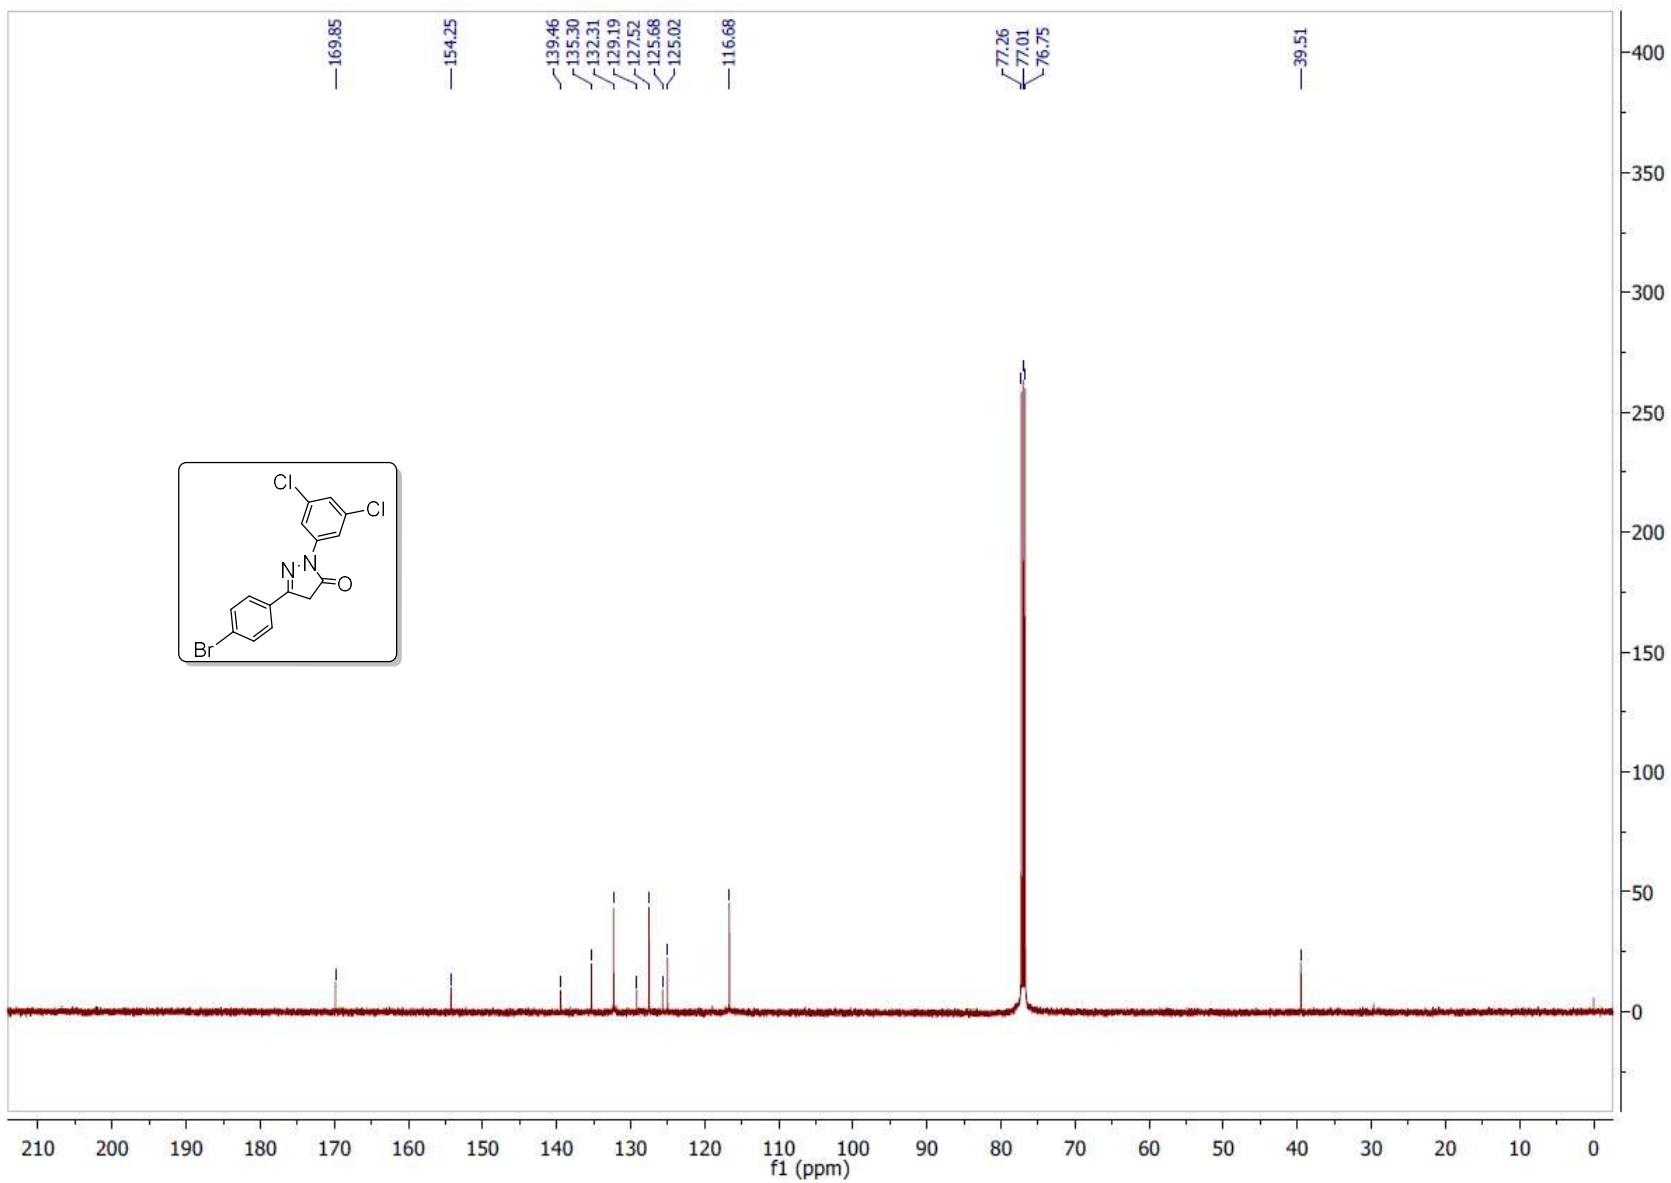

**5-(4-bromophenyl)-2-(3,5-dichlorophenyl)-2,4-dihydro-3H-pyrazol-3-one (P17): ESI-MS**

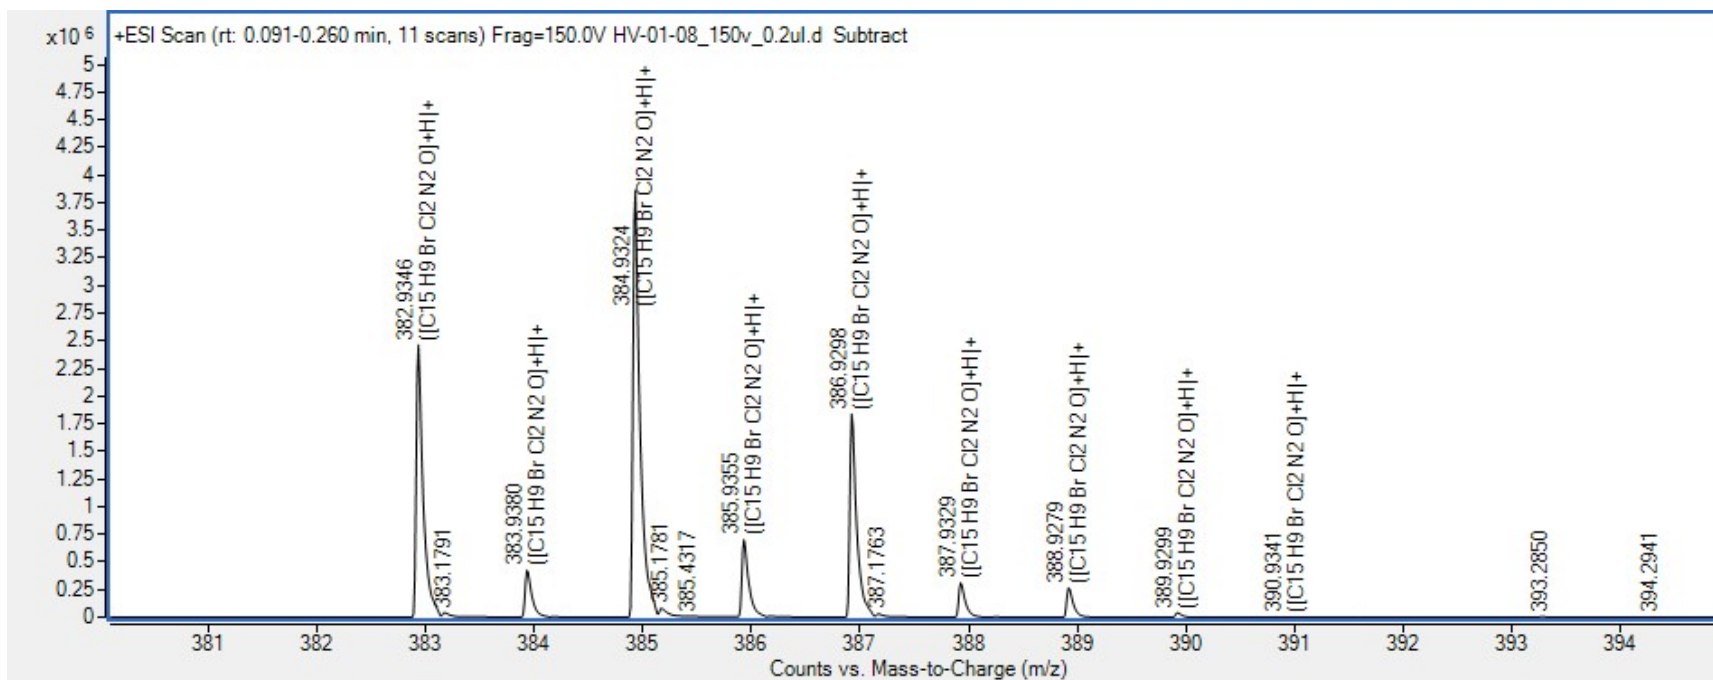

| Formula,            | Species, | m/z,      | Score, | Diff (abs. ppm), | Mass     |
|---------------------|----------|-----------|--------|------------------|----------|
| C15 H9 Br Cl2 N2 O, | (M+H)+,  | 382.9346, | 99.67, | 0.37,            | 381.9274 |
